# Supplementary material for: A one-pot three-component domino protocol for the synthesis of penta-substituted 4H-pyrans
Source: Royal Society of Chemistry journal article supplement (doi:10.1039/c3ra41510d), 2013-01-01
Supplement: c3ra41510d.pdf [file c3ra41510d.pdf]

Electronic Supplementary Material (ESI) for RSC Advances

This journal is © The Royal Society of Chemistry

# **A one-pot three-component domino protocol for the synthesis of penta-substituted 4*H*-pyrans**

**Sathiyamoorthi Sivakumar, Selvaraj Kanchithalaivan and Raju Ranjith Kumar\***

*Department of Organic Chemistry, School of Chemistry, Madurai Kamaraj University,  
Madurai – 625021, Tamil Nadu, India*

Supporting Information

## Table of Contents

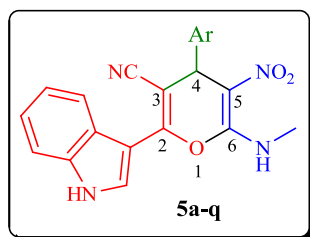

| No | List of Figures                           | Page |
|----|-------------------------------------------|------|
| 1  | <sup>1</sup> H NMR Spectrum of <b>5a</b>  | 4    |
| 2  | <sup>13</sup> C NMR Spectrum of <b>5a</b> | 4    |
| 3  | <sup>1</sup> H NMR Spectrum of <b>5b</b>  | 5    |
| 4  | <sup>13</sup> C NMR Spectrum of <b>5b</b> | 5    |
| 5  | <sup>1</sup> H NMR Spectrum of <b>5c</b>  | 6    |
| 6  | <sup>13</sup> C NMR Spectrum of <b>5c</b> | 6    |
| 7  | <sup>1</sup> H NMR Spectrum of <b>5d</b>  | 7    |
| 8  | <sup>13</sup> C NMR Spectrum of <b>5d</b> | 7    |
| 9  | <sup>1</sup> H NMR Spectrum of <b>5e</b>  | 8    |
| 10 | <sup>13</sup> C NMR Spectrum of <b>5e</b> | 8    |
| 11 | <sup>1</sup> H NMR Spectrum of <b>5f</b>  | 9    |
| 12 | <sup>13</sup> C NMR Spectrum of <b>5f</b> | 9    |
| 13 | DEPT 135 NMR Spectrum of <b>5f</b>        | 10   |
| 14 | H, H-COSY Spectrum of <b>5f</b>           | 10   |
| 15 | C, H-COSY Spectrum of <b>5f</b>           | 11   |
| 16 | HMBC Spectrum of <b>5f</b>                | 11   |
| 17 | <sup>1</sup> H NMR Spectrum of <b>5g</b>  | 12   |
| 18 | <sup>13</sup> C NMR Spectrum of <b>5g</b> | 12   |
| 19 | <sup>1</sup> H NMR Spectrum of <b>5h</b>  | 13   |
| 20 | <sup>13</sup> C NMR Spectrum of <b>5h</b> | 13   |
| 21 | <sup>1</sup> H NMR Spectrum of <b>5i</b>  | 14   |
| 22 | <sup>13</sup> C NMR Spectrum of <b>5i</b> | 14   |
| 23 | <sup>1</sup> H NMR Spectrum of <b>5j</b>  | 15   |
| 24 | <sup>13</sup> C NMR Spectrum of <b>5j</b> | 15   |
| 25 | <sup>1</sup> H NMR Spectrum of <b>5k</b>  | 16   |
| 26 | <sup>13</sup> C NMR Spectrum of <b>5k</b> | 16   |
| 27 | <sup>1</sup> H NMR Spectrum of <b>5l</b>  | 17   |
| 28 | <sup>13</sup> C NMR Spectrum of <b>5l</b> | 17   |
| 29 | <sup>1</sup> H NMR Spectrum of <b>5m</b>  | 18   |
| 30 | <sup>13</sup> C NMR Spectrum of <b>5m</b> | 18   |
| 31 | <sup>1</sup> H NMR Spectrum of <b>5n</b>  | 19   |
| 32 | <sup>13</sup> C NMR Spectrum of <b>5n</b> | 19   |
| 33 | <sup>1</sup> H NMR Spectrum of <b>5o</b>  | 20   |
| 34 | <sup>13</sup> C NMR Spectrum of <b>5o</b> | 20   |
| 35 | <sup>1</sup> H NMR Spectrum of <b>5p</b>  | 21   |
| 36 | <sup>13</sup> C NMR Spectrum of <b>5p</b> | 21   |
| 37 | <sup>1</sup> H NMR Spectrum of <b>5q</b>  | 22   |
| 38 | <sup>13</sup> C NMR Spectrum of <b>5q</b> | 22   |

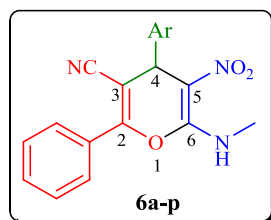

| No | List of Figures                           | Page |
|----|-------------------------------------------|------|
| 39 | <sup>1</sup> H NMR Spectrum of <b>6a</b>  | 23   |
| 40 | <sup>13</sup> C NMR Spectrum of <b>6a</b> | 23   |
| 41 | <sup>1</sup> H NMR Spectrum of <b>6b</b>  | 24   |
| 42 | <sup>13</sup> C NMR Spectrum of <b>6b</b> | 24   |
| 43 | DEPT 135 NMR Spectrum of <b>6b</b>        | 25   |
| 44 | H, H-COSY Spectrum of <b>6b</b>           | 25   |
| 45 | C, H-COSY Spectrum of <b>6b</b>           | 26   |
| 46 | HMBC Spectrum of <b>6b</b>                | 26   |
| 47 | <sup>1</sup> H NMR Spectrum of <b>6c</b>  | 27   |
| 48 | <sup>13</sup> C NMR Spectrum of <b>6c</b> | 27   |
| 49 | <sup>1</sup> H NMR Spectrum of <b>6d</b>  | 28   |
| 50 | <sup>13</sup> C NMR Spectrum of <b>6d</b> | 28   |
| 51 | <sup>1</sup> H NMR Spectrum of <b>6e</b>  | 29   |
| 52 | <sup>13</sup> C NMR Spectrum of <b>6e</b> | 29   |
| 53 | <sup>1</sup> H NMR Spectrum of <b>6f</b>  | 30   |
| 54 | <sup>13</sup> C NMR Spectrum of <b>6f</b> | 30   |
| 55 | <sup>1</sup> H NMR Spectrum of <b>6g</b>  | 31   |
| 56 | <sup>13</sup> C NMR Spectrum of <b>6g</b> | 31   |
| 57 | <sup>1</sup> H NMR Spectrum of <b>6h</b>  | 32   |
| 58 | <sup>13</sup> C NMR Spectrum of <b>6h</b> | 32   |
| 59 | <sup>1</sup> H NMR Spectrum of <b>6i</b>  | 33   |
| 60 | <sup>13</sup> C NMR Spectrum of <b>6i</b> | 33   |
| 61 | <sup>1</sup> H NMR Spectrum of <b>6j</b>  | 34   |
| 62 | <sup>13</sup> C NMR Spectrum of <b>6j</b> | 34   |
| 63 | <sup>1</sup> H NMR Spectrum of <b>6k</b>  | 35   |
| 64 | <sup>13</sup> C NMR Spectrum of <b>6k</b> | 35   |
| 65 | <sup>1</sup> H NMR Spectrum of <b>6l</b>  | 36   |
| 66 | <sup>13</sup> C NMR Spectrum of <b>6l</b> | 36   |
| 67 | <sup>1</sup> H NMR Spectrum of <b>6m</b>  | 37   |
| 68 | <sup>13</sup> C NMR Spectrum of <b>6m</b> | 37   |
| 69 | <sup>1</sup> H NMR Spectrum of <b>6n</b>  | 38   |
| 70 | <sup>13</sup> C NMR Spectrum of <b>6n</b> | 38   |
| 71 | <sup>1</sup> H NMR Spectrum of <b>6o</b>  | 39   |
| 72 | <sup>13</sup> C NMR Spectrum of <b>6o</b> | 39   |
| 73 | <sup>1</sup> H NMR Spectrum of <b>6p</b>  | 40   |
| 74 | <sup>13</sup> C NMR Spectrum of <b>6p</b> | 40   |

| No | List of Figures                                                          | Page |
|----|--------------------------------------------------------------------------|------|
| 75 | <sup>1</sup> H NMR spectrum of isolated intermediate <b>8 (benzoyl)</b>  | 41   |
| 76 | <sup>13</sup> C NMR spectrum of isolated intermediate <b>8 (benzoyl)</b> | 42   |
| 77 | <sup>1</sup> H NMR spectrum of isolated intermediate <b>8 (indolyl)</b>  | 43   |
| 78 | <sup>13</sup> C NMR spectrum of isolated intermediate <b>8 (indolyl)</b> | 44   |

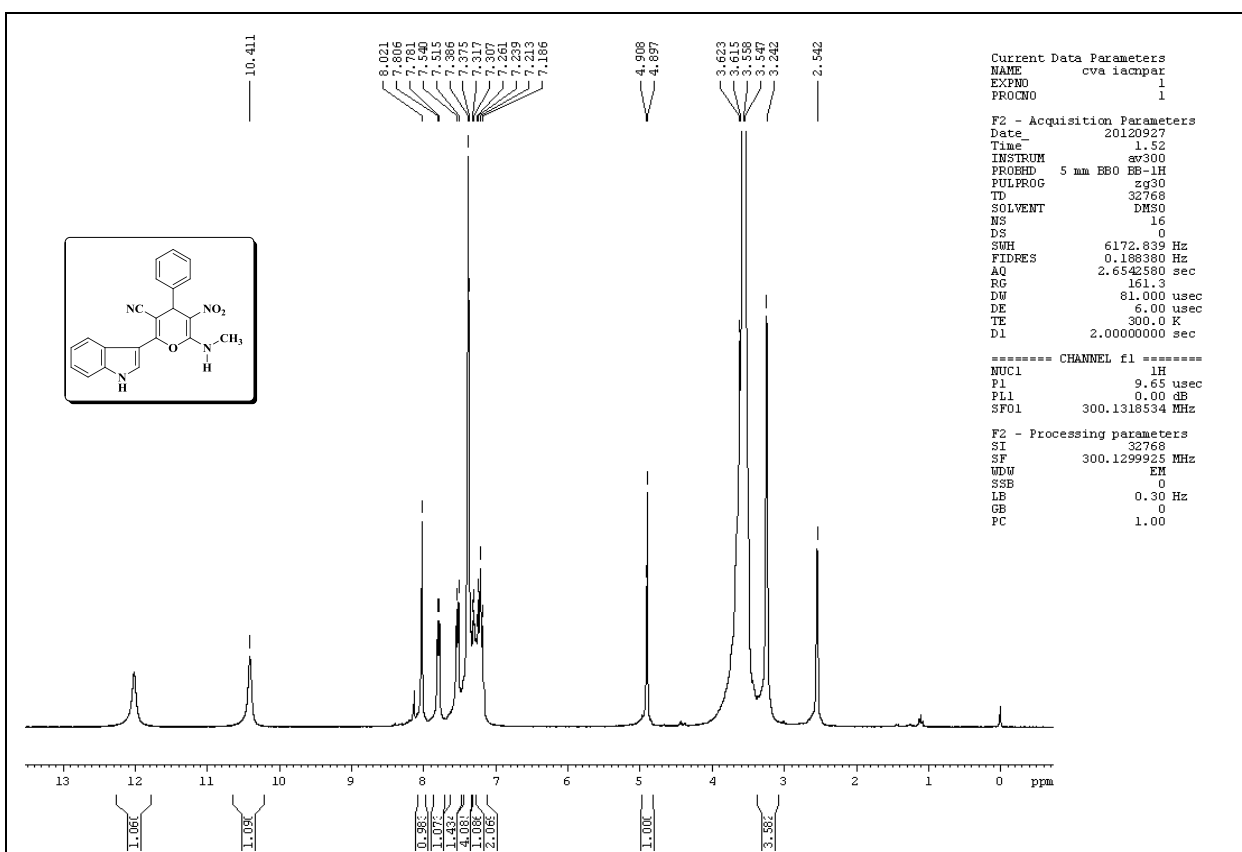

Figure 1. <sup>1</sup>H NMR Spectrum of 5a

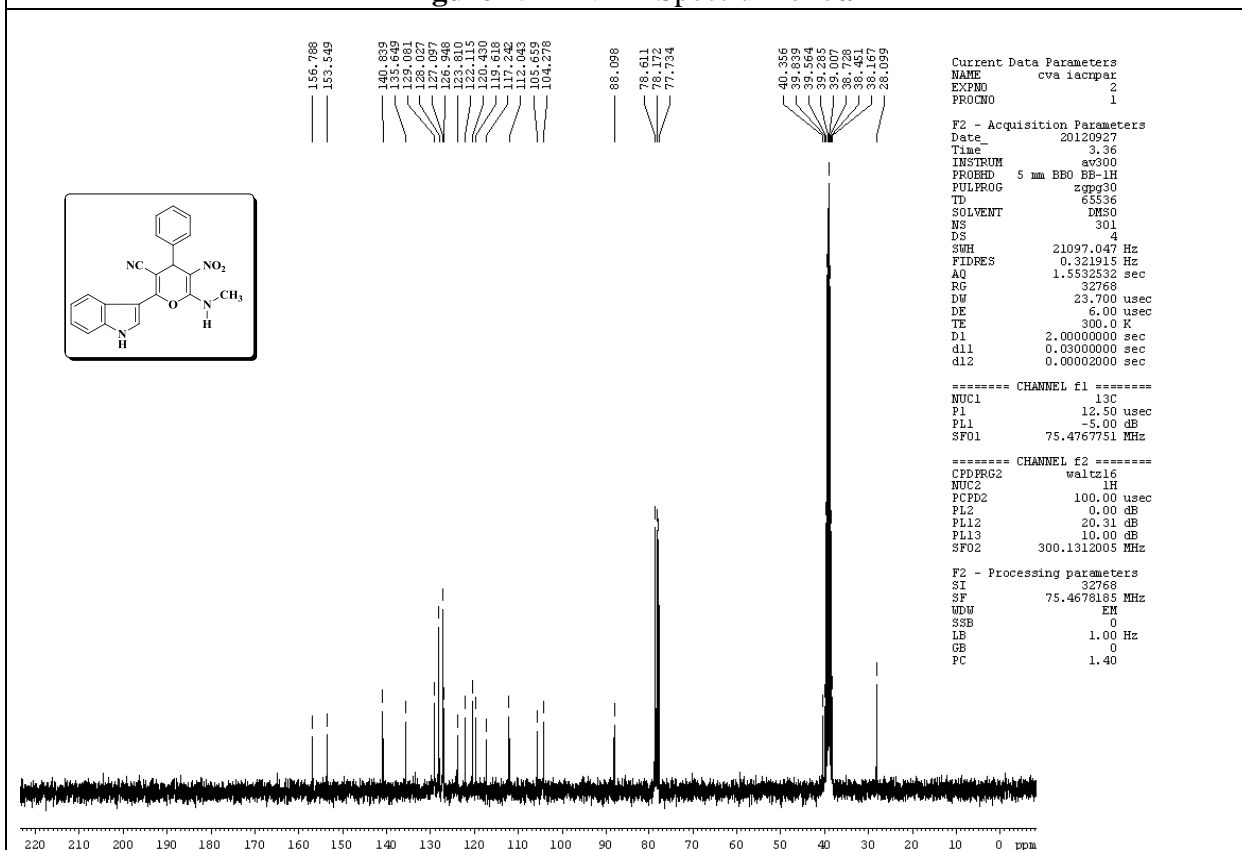

figure 2. <sup>13</sup>C NMR Spectrum of 5a

F

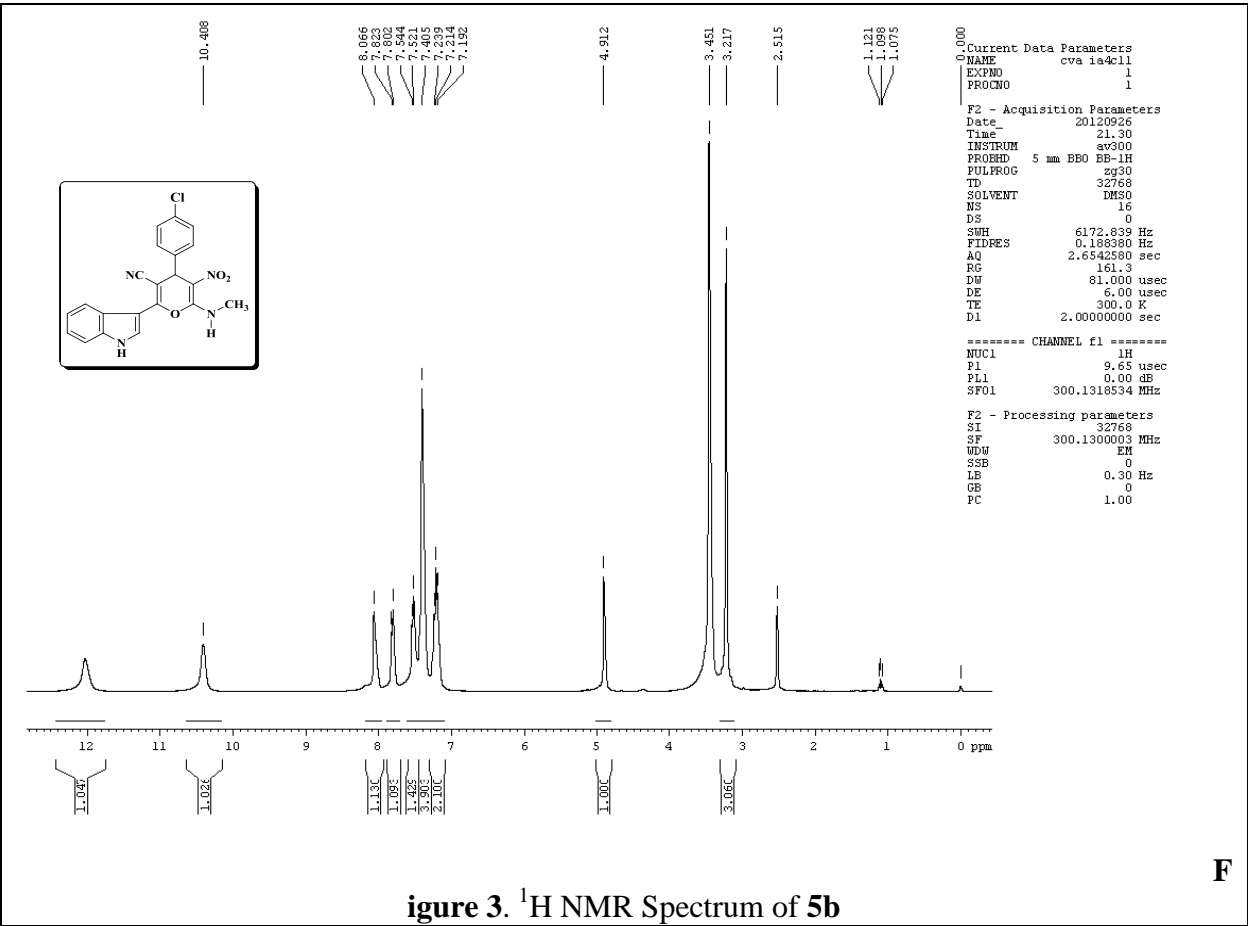

figure 3. <sup>1</sup>H NMR Spectrum of 5b

F

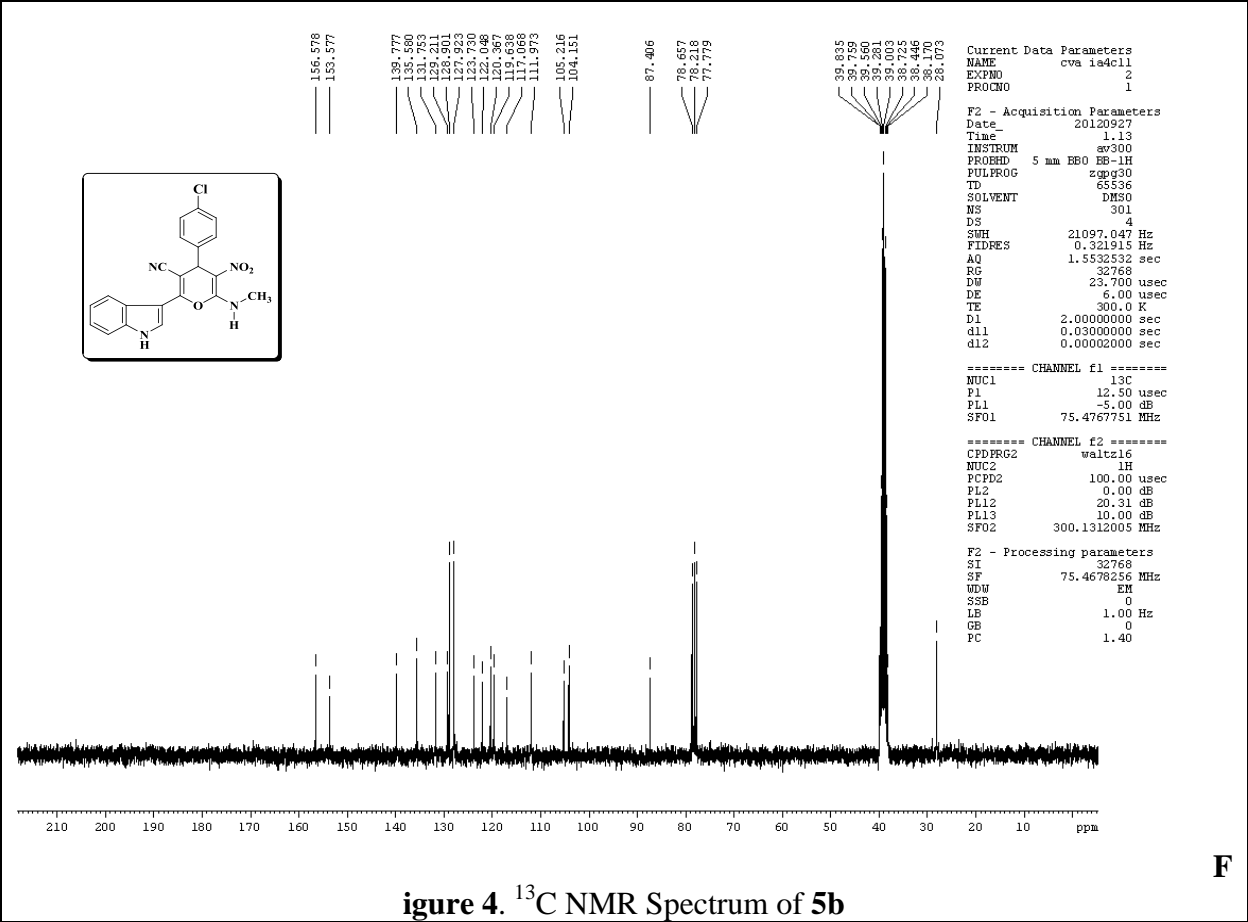

figure 4. <sup>13</sup>C NMR Spectrum of 5b

F

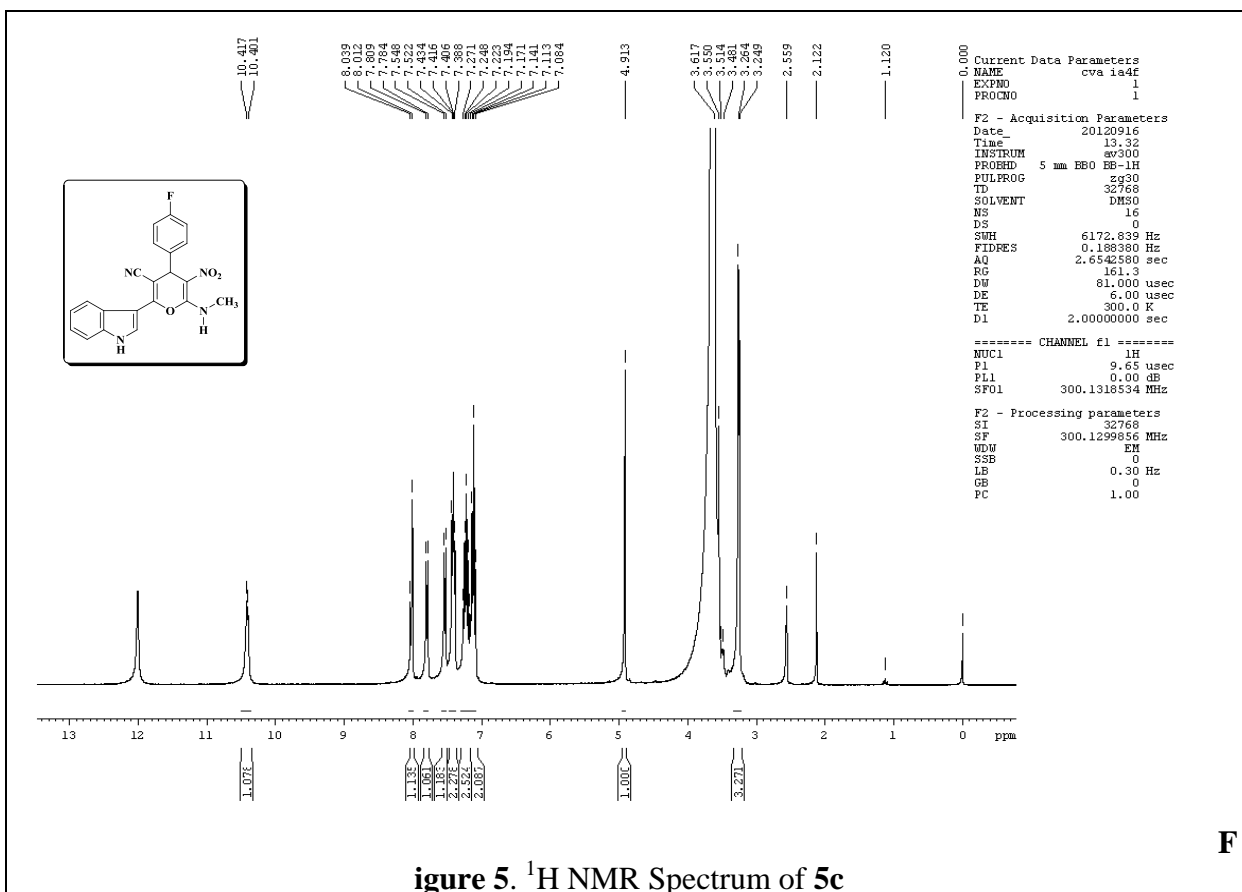

figure 5. <sup>1</sup>H NMR Spectrum of 5c

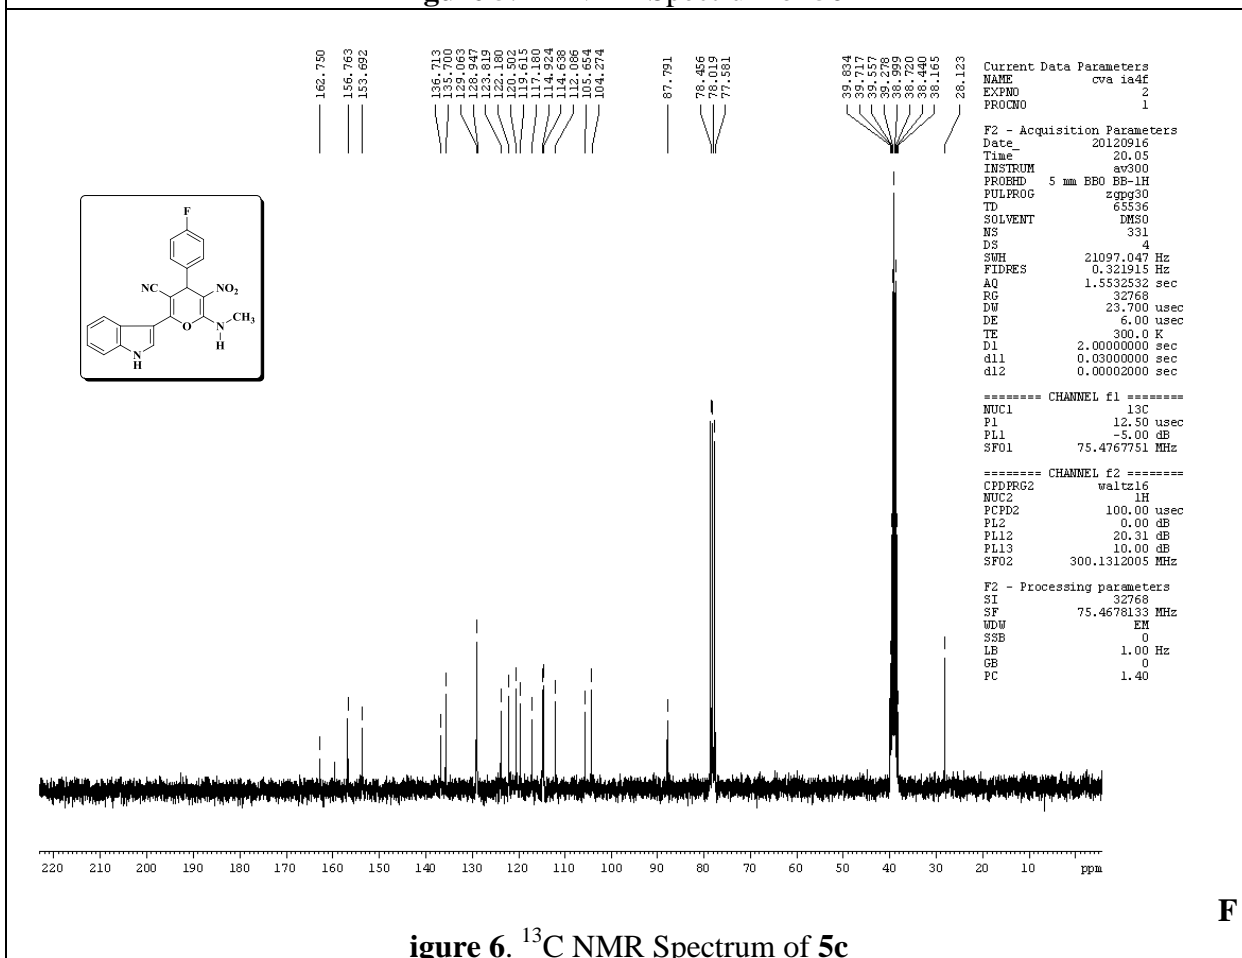

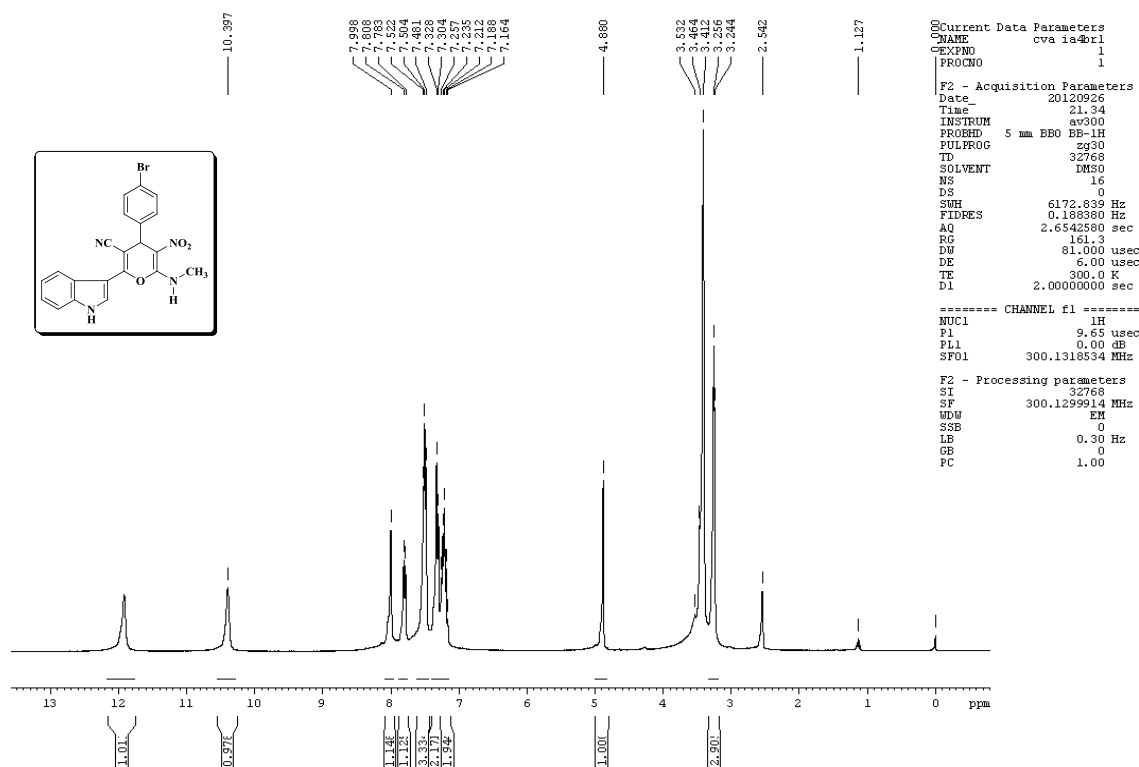

figure 7. <sup>1</sup>H NMR Spectrum of 5d

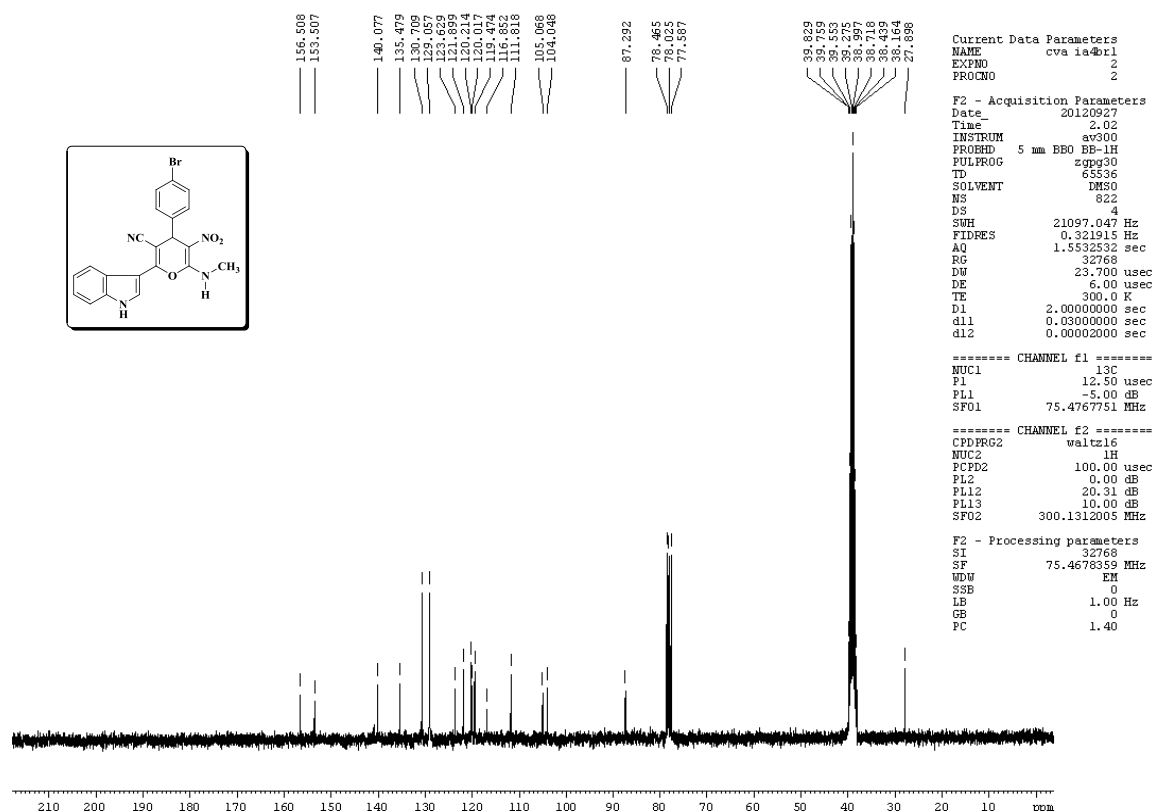

figure 8. <sup>13</sup>C NMR Spectrum of 5d

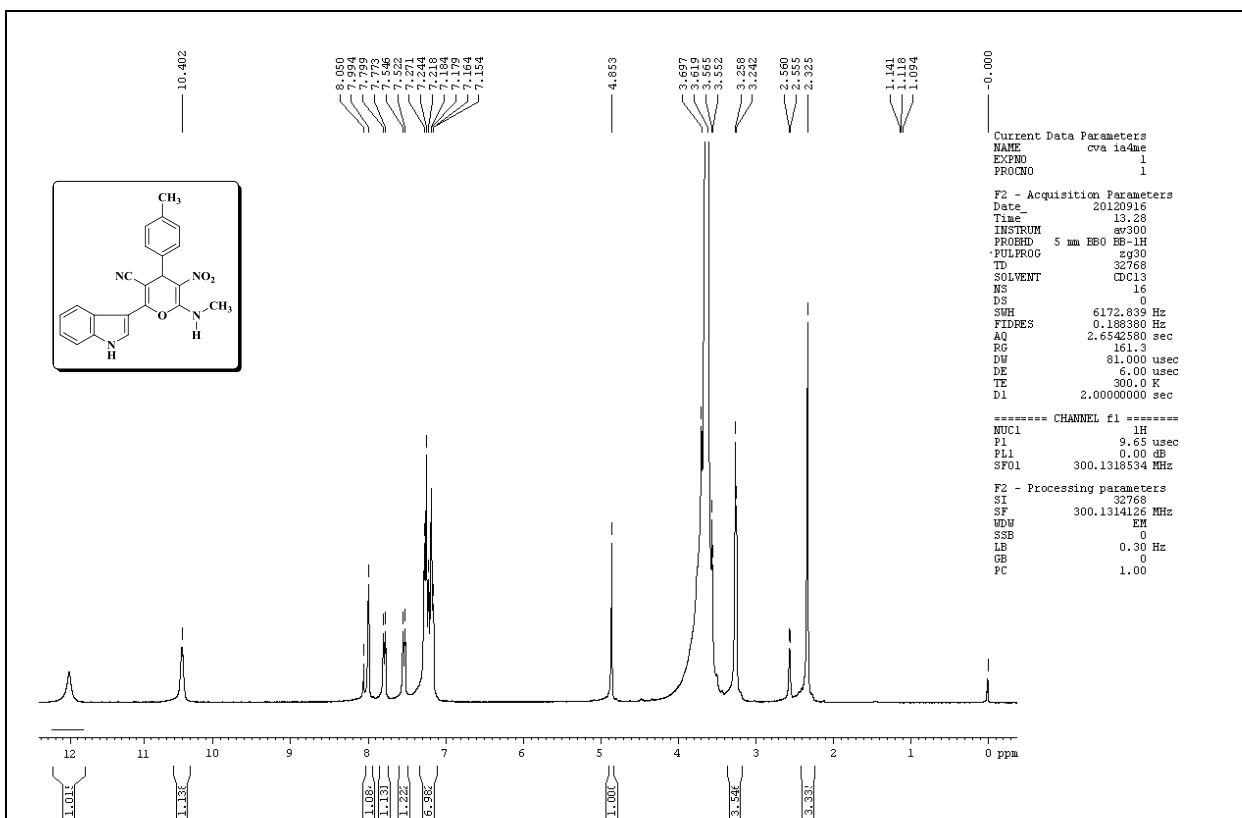

Figure 9.  $^1\text{H}$  NMR Spectrum of 5e

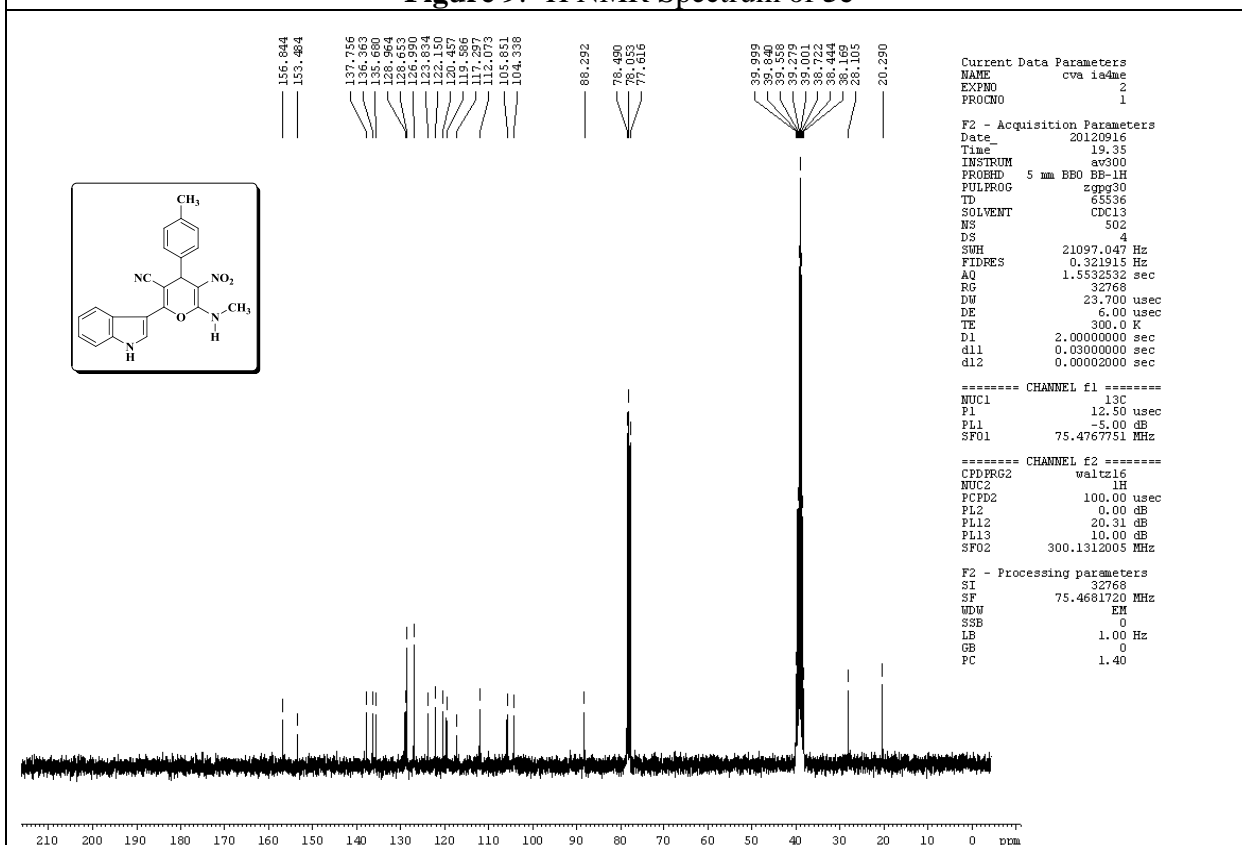

Figure 10.  $^{13}\text{C}$  NMR Spectrum of 5e

F

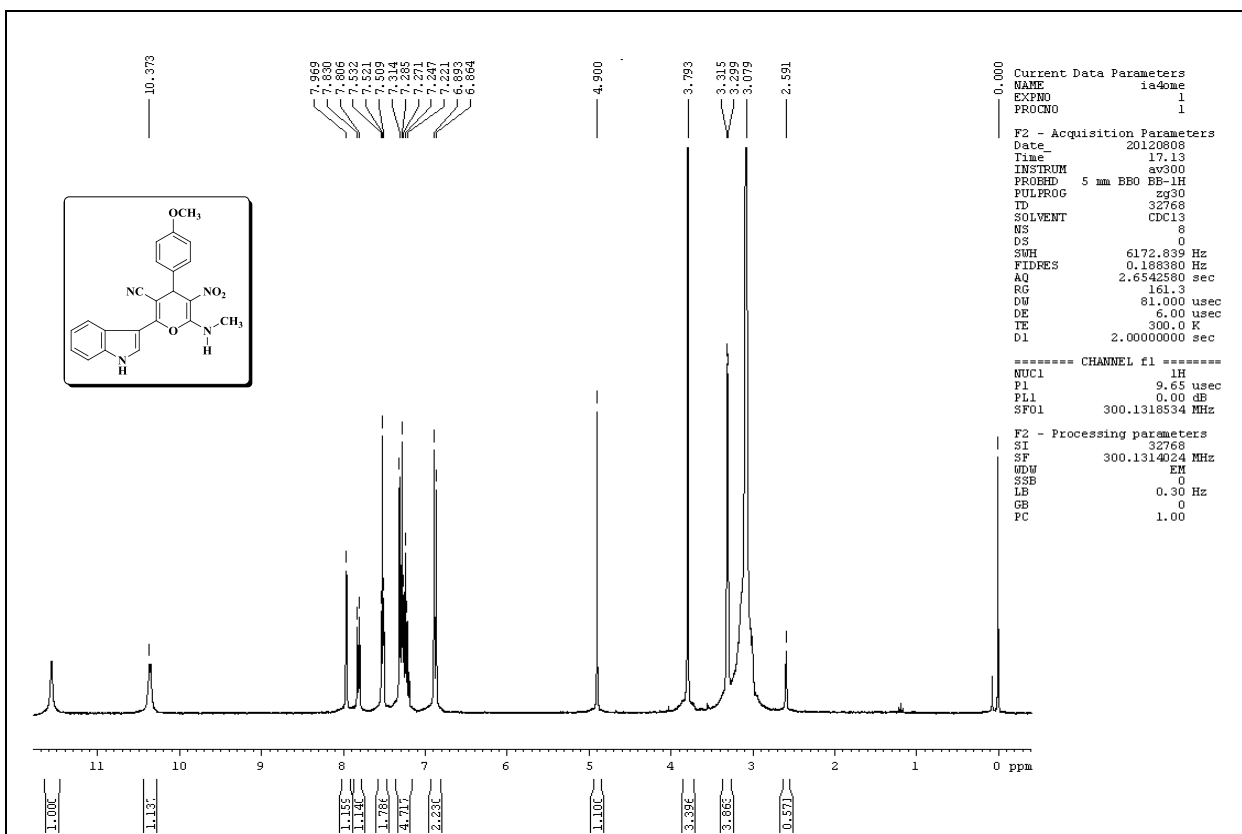

Figure 11. <sup>1</sup>H NMR Spectrum of **5f**

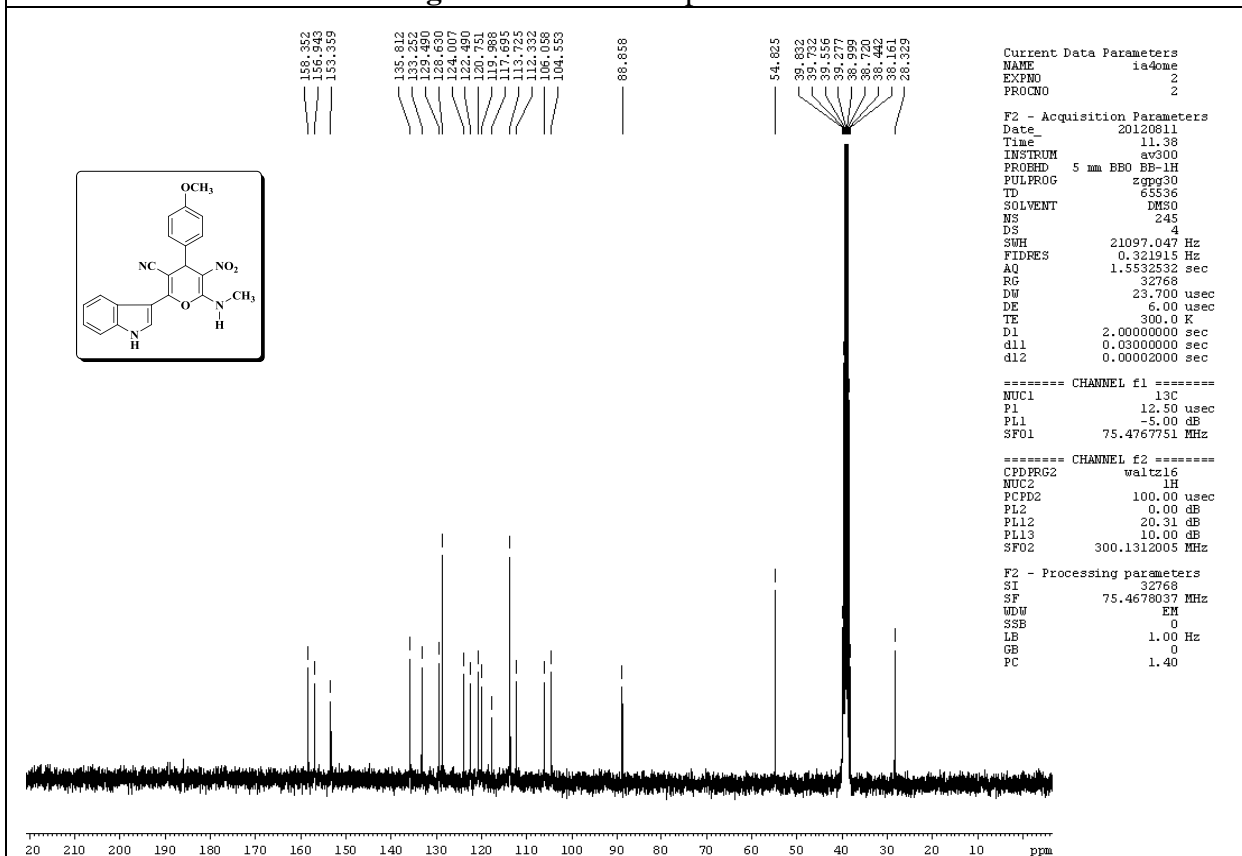

Figure 12. <sup>13</sup>C NMR Spectrum of **5f**

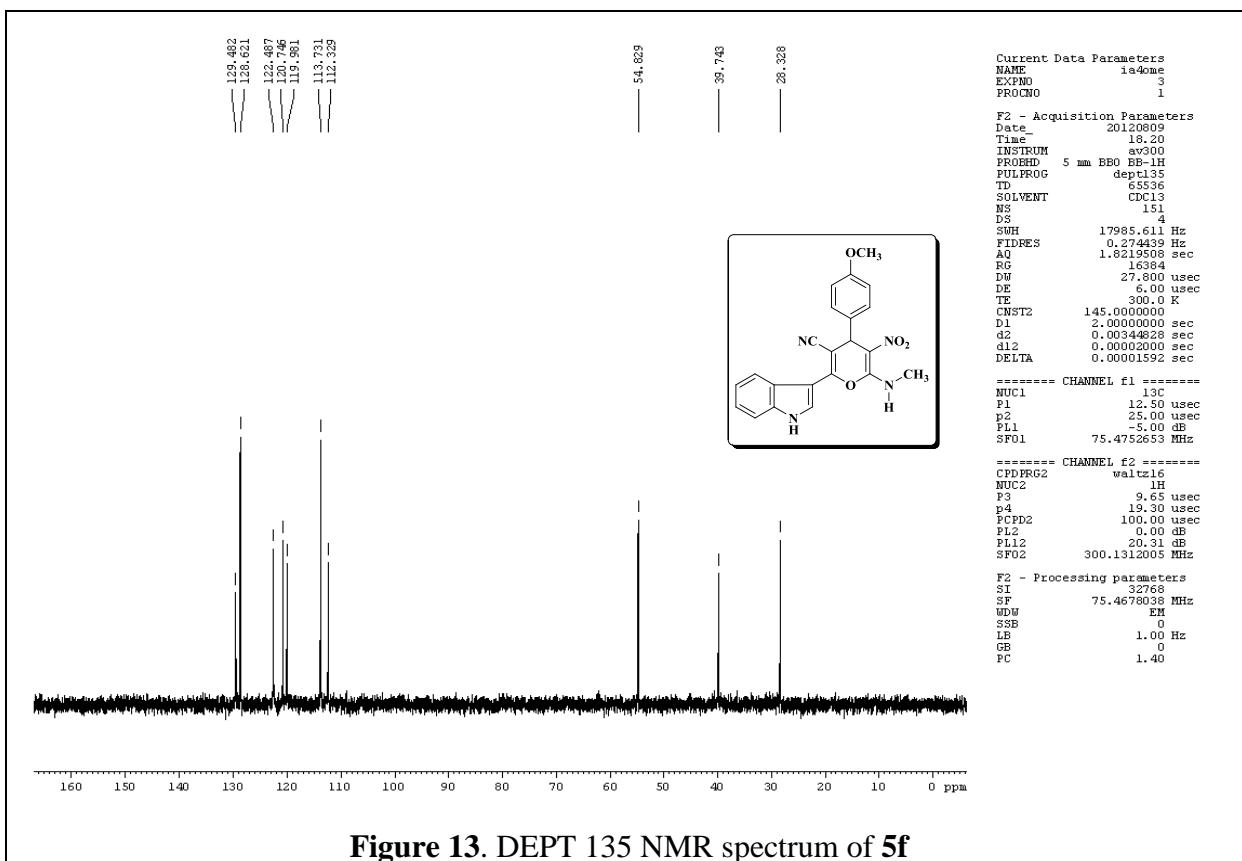

Figure 13. DEPT 135 NMR spectrum of **5f**

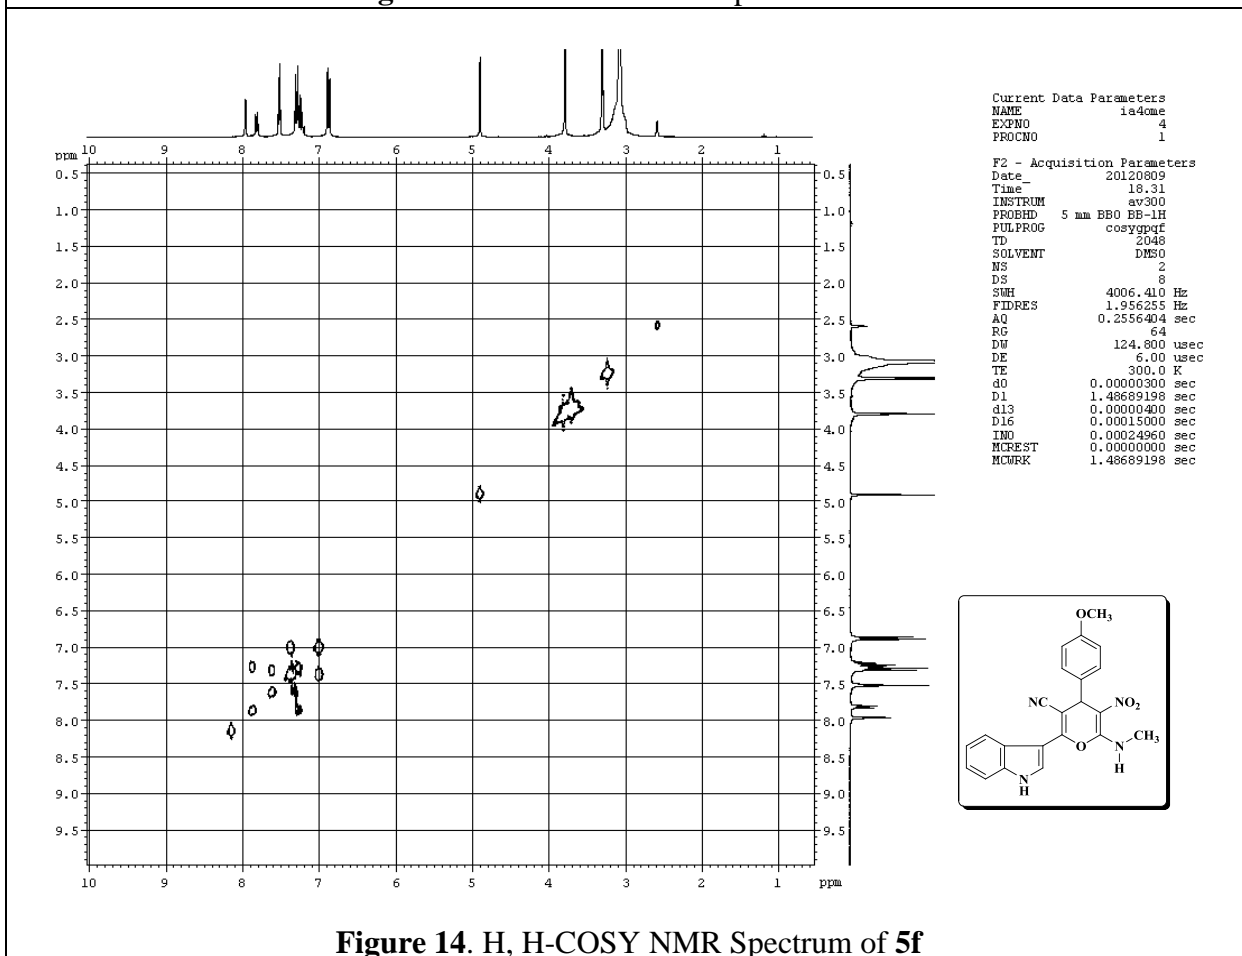

Figure 14. H, H-COSY NMR Spectrum of **5f**

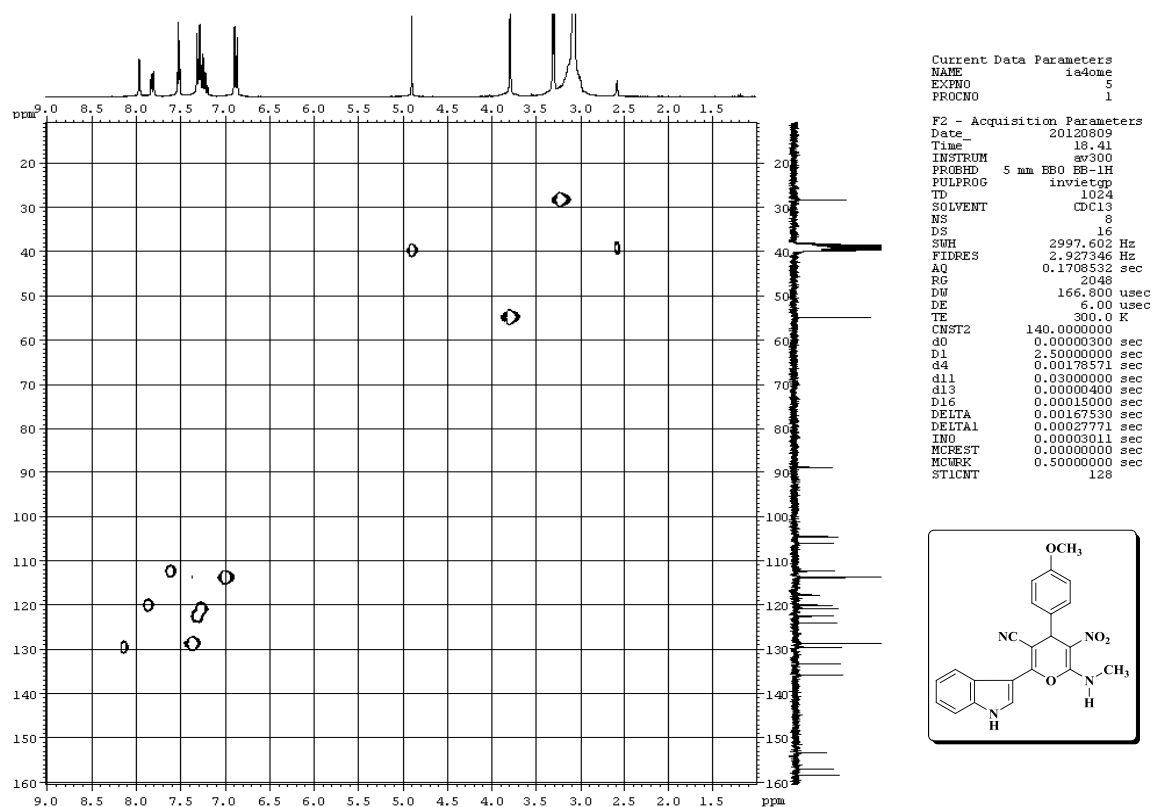

Figure 15. C, H-COSY NMR Spectrum of 5f

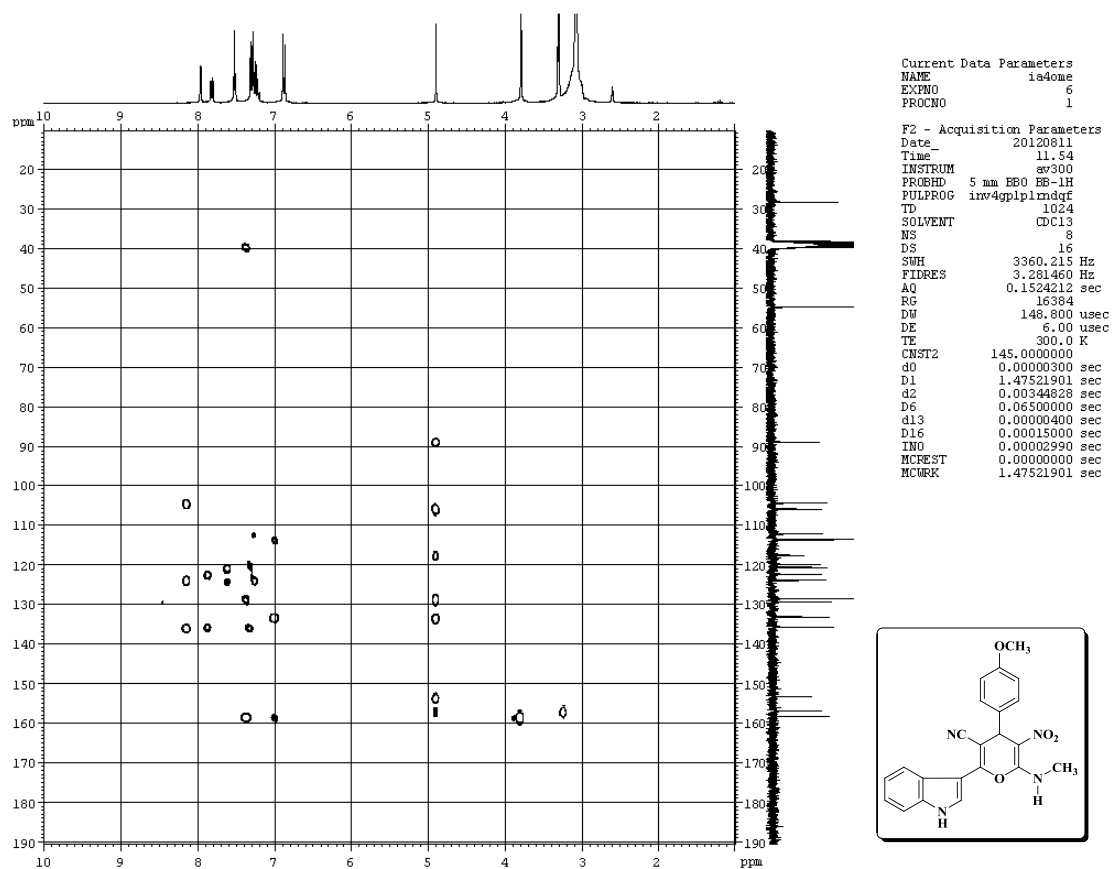

Figure 16. HMBC Spectrum of 5f

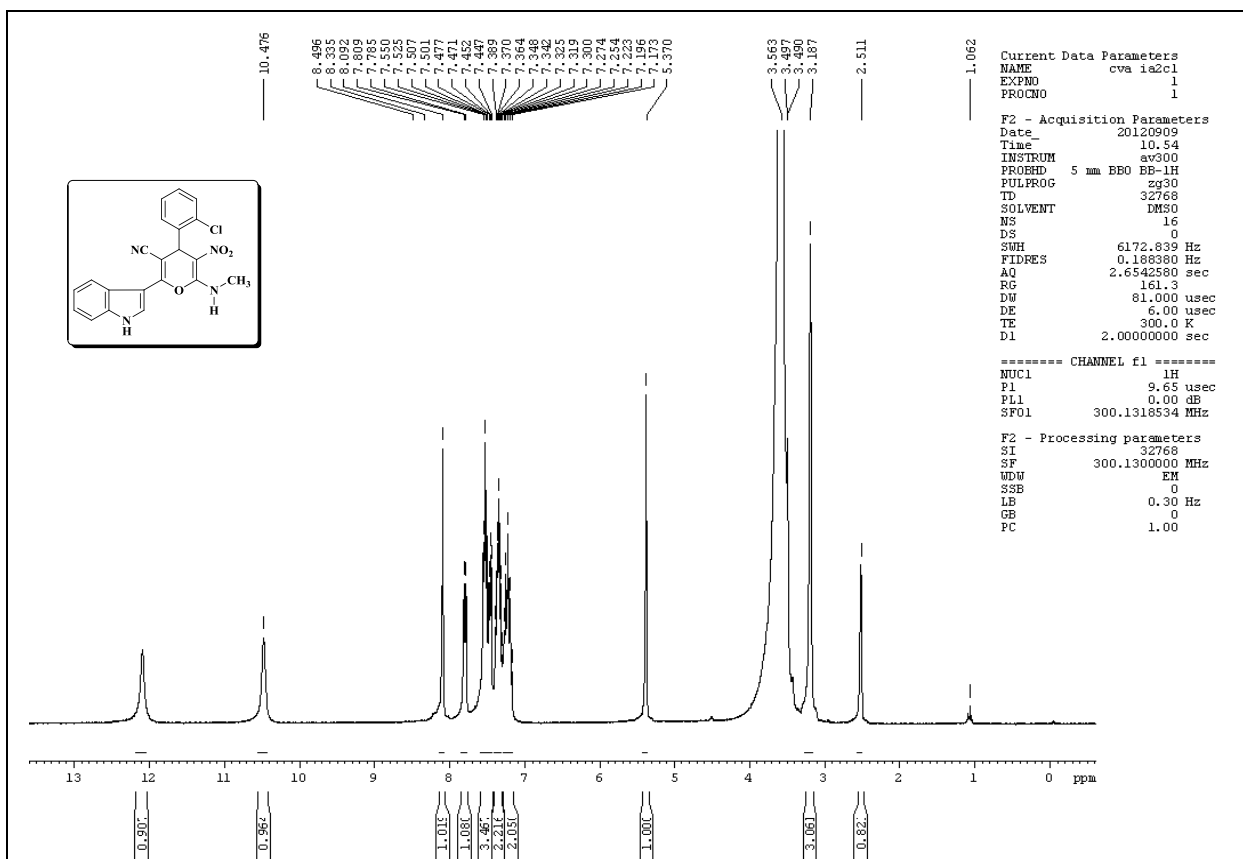

Figure 17. <sup>1</sup>H NMR Spectrum of 5g

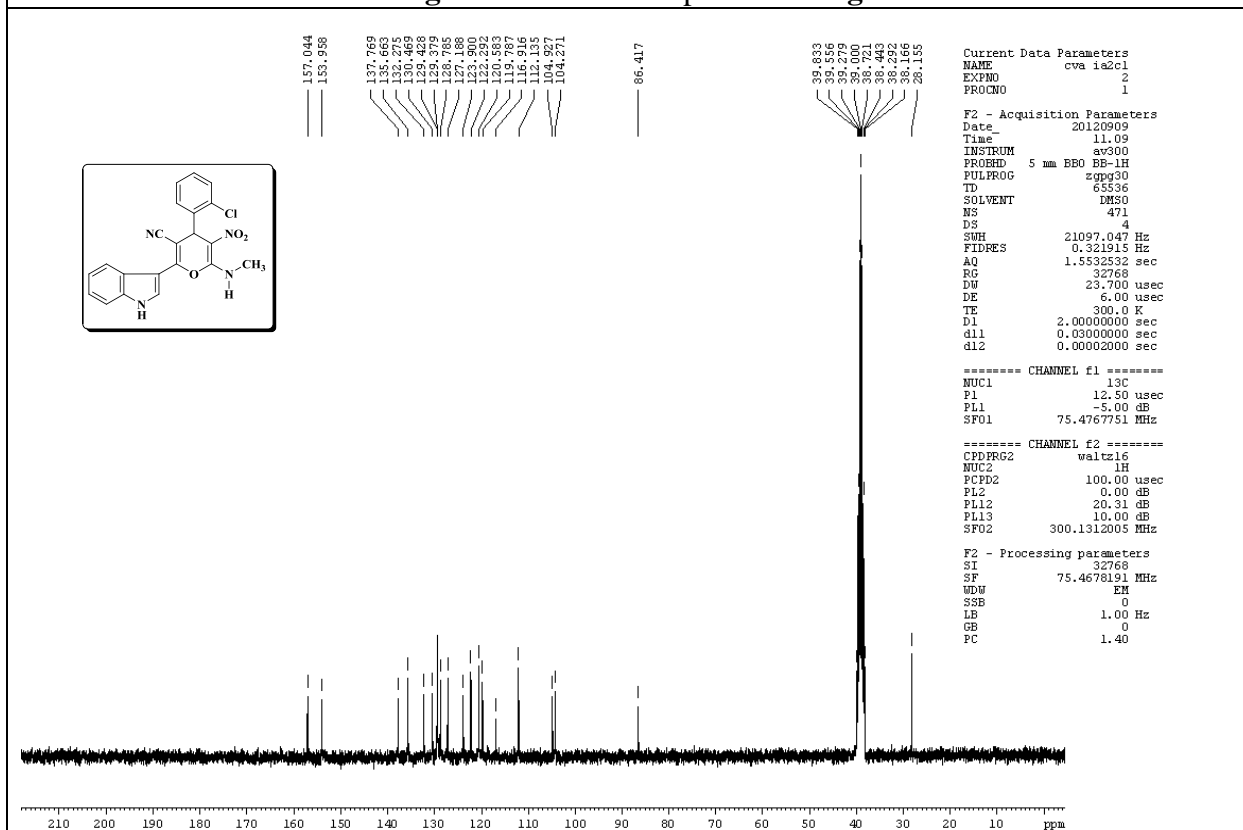

figure 18. <sup>13</sup>C NMR Spectrum of 5g

F

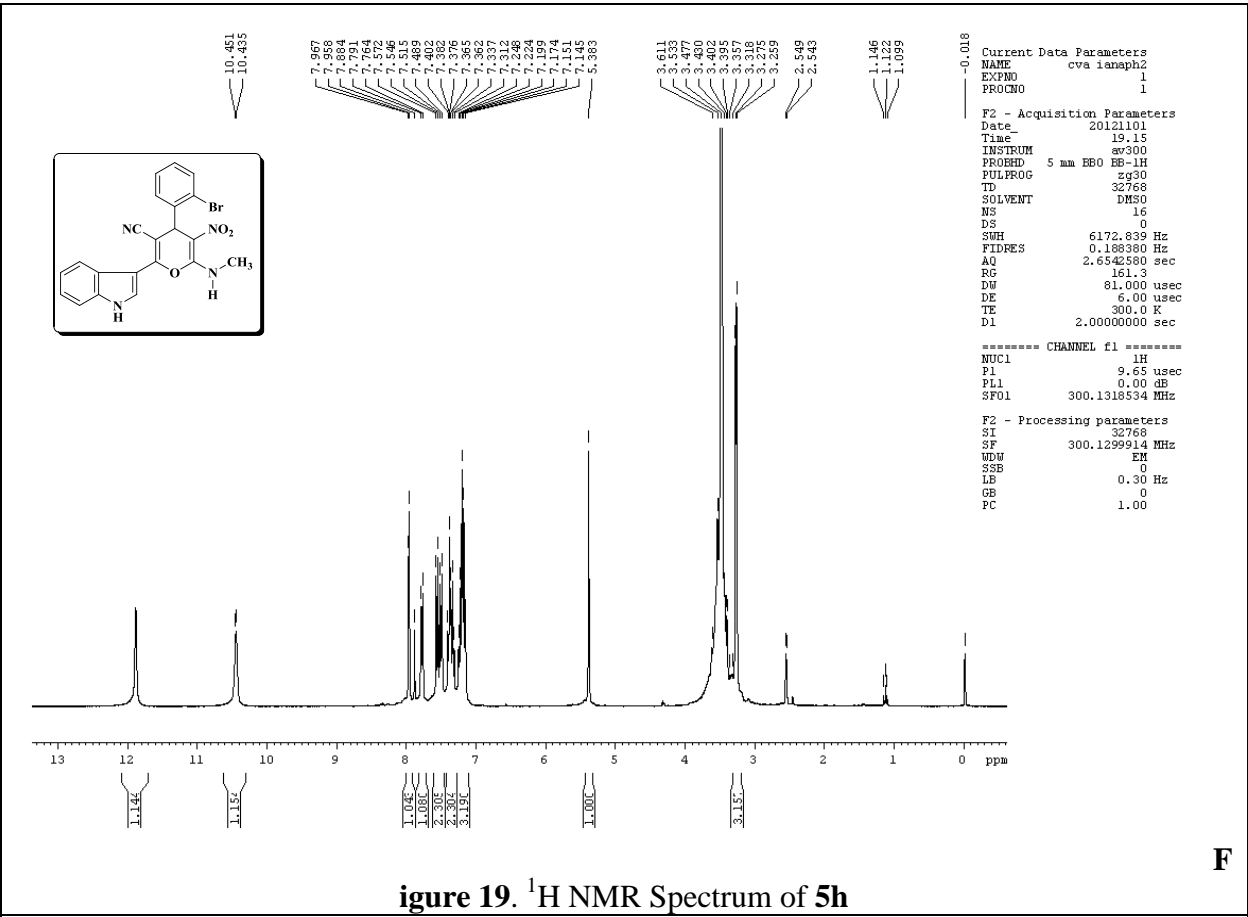

**figure 19.** <sup>1</sup>H NMR Spectrum of **5h**

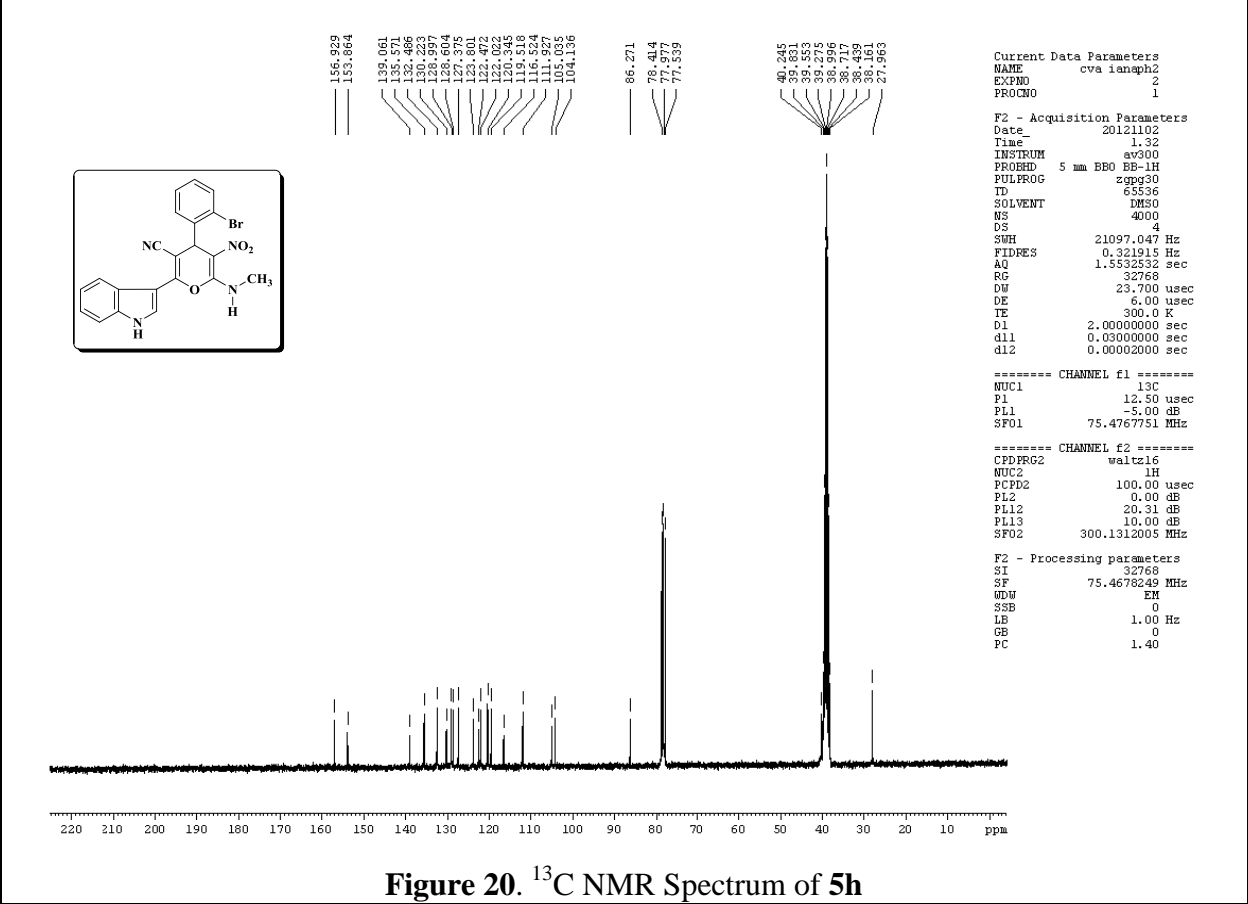

**Figure 20.** <sup>13</sup>C NMR Spectrum of **5h**

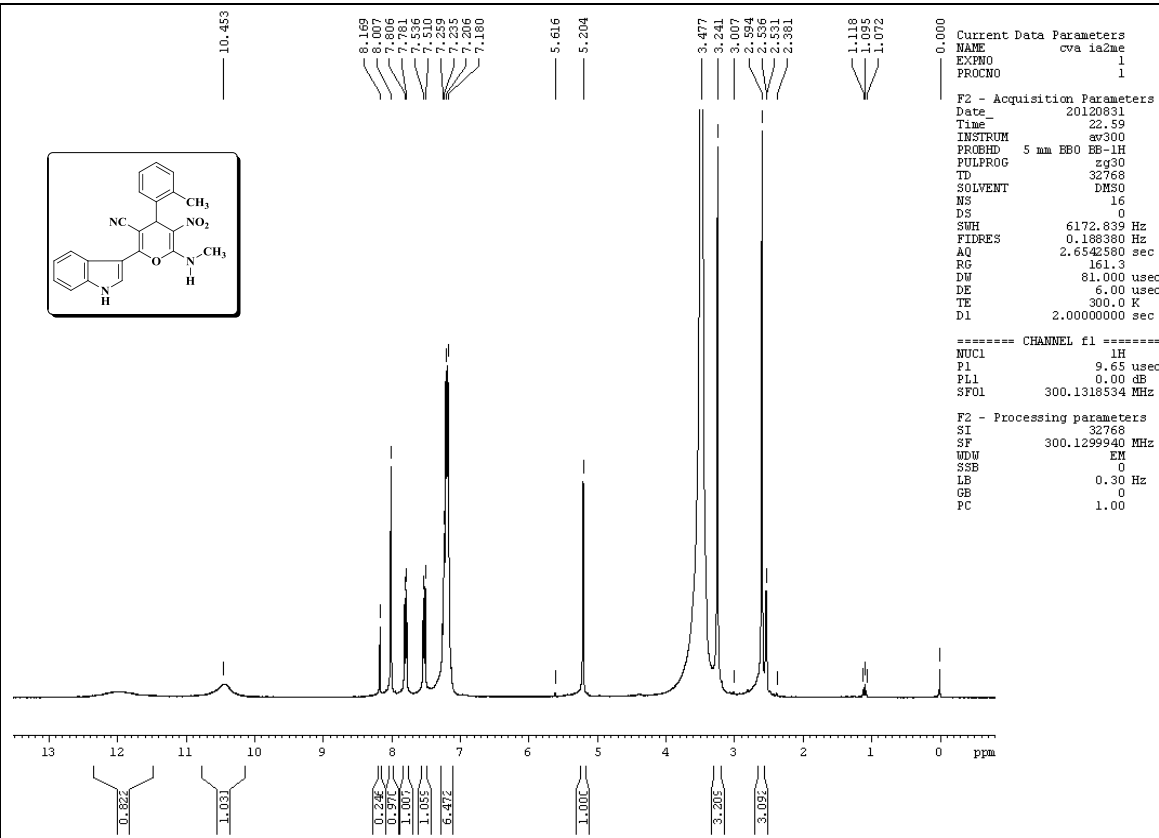

figure 21. <sup>1</sup>H NMR Spectrum of 5i

F

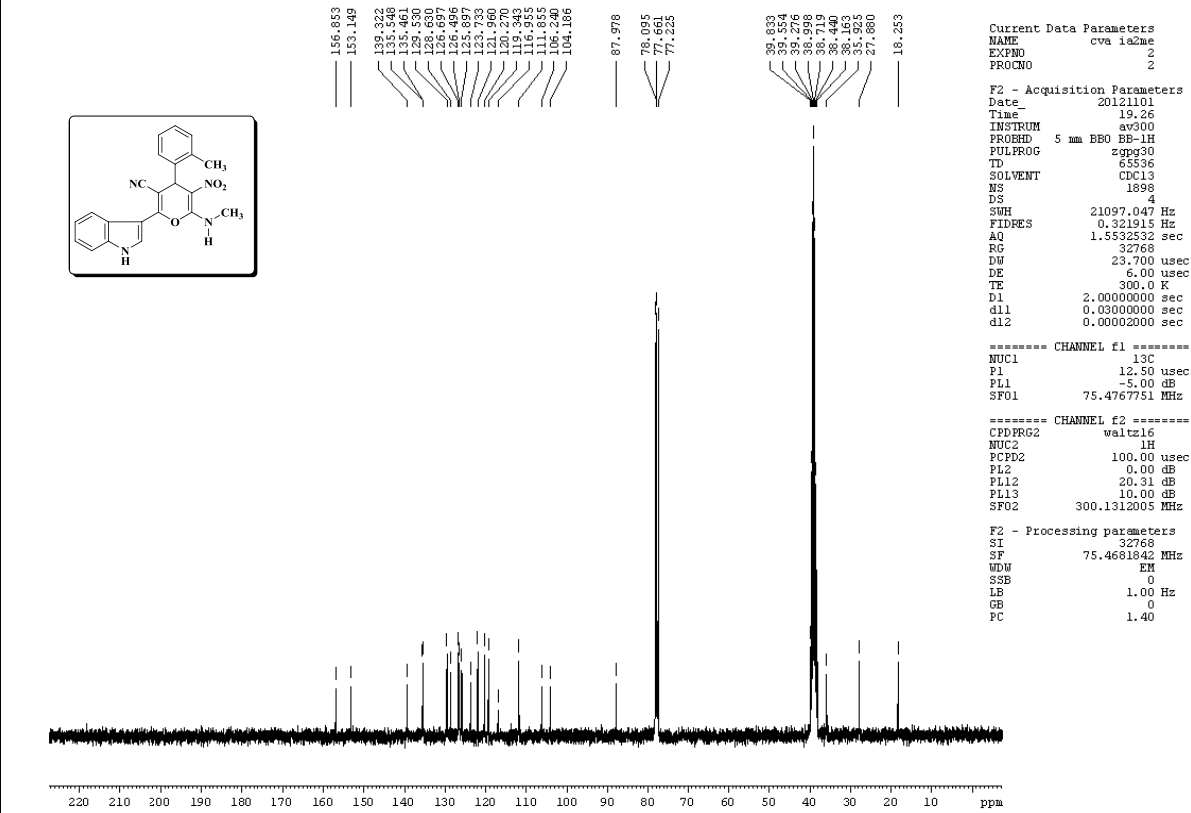

figure 22. <sup>13</sup>C NMR Spectrum of 5i

F

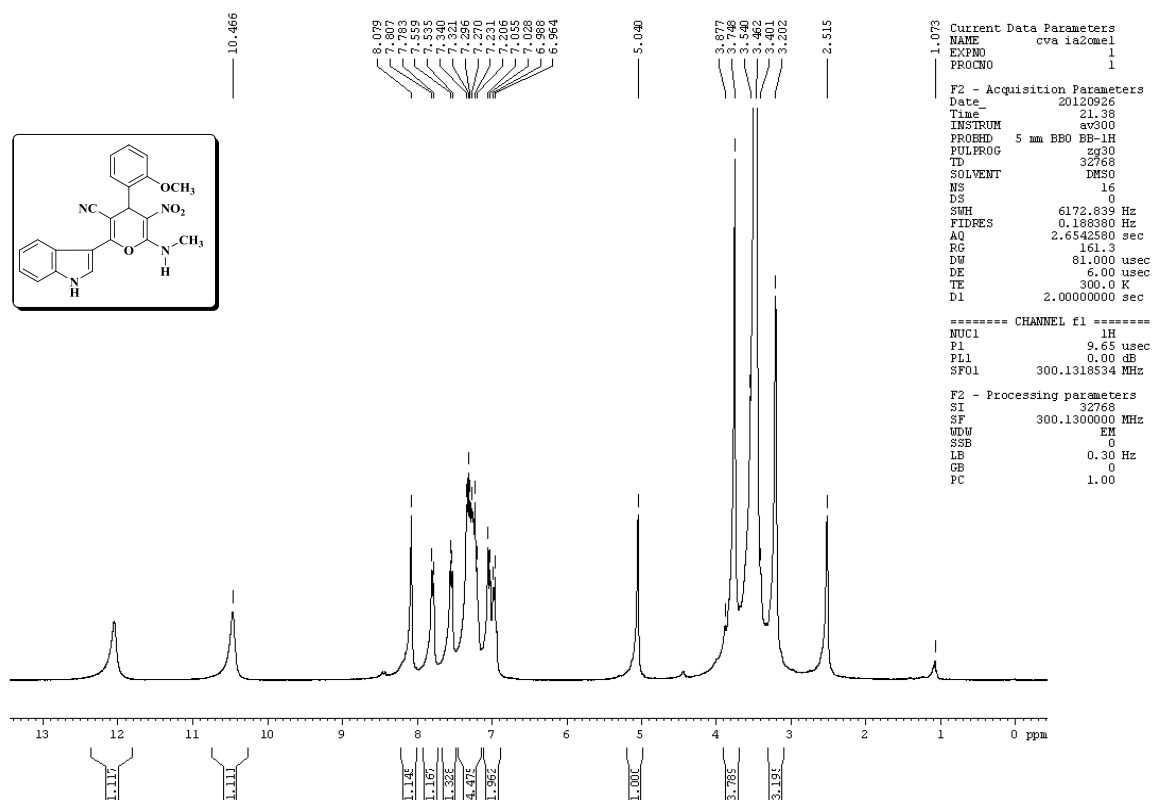

figure 23.  $^1\text{H}$  NMR Spectrum of 5j

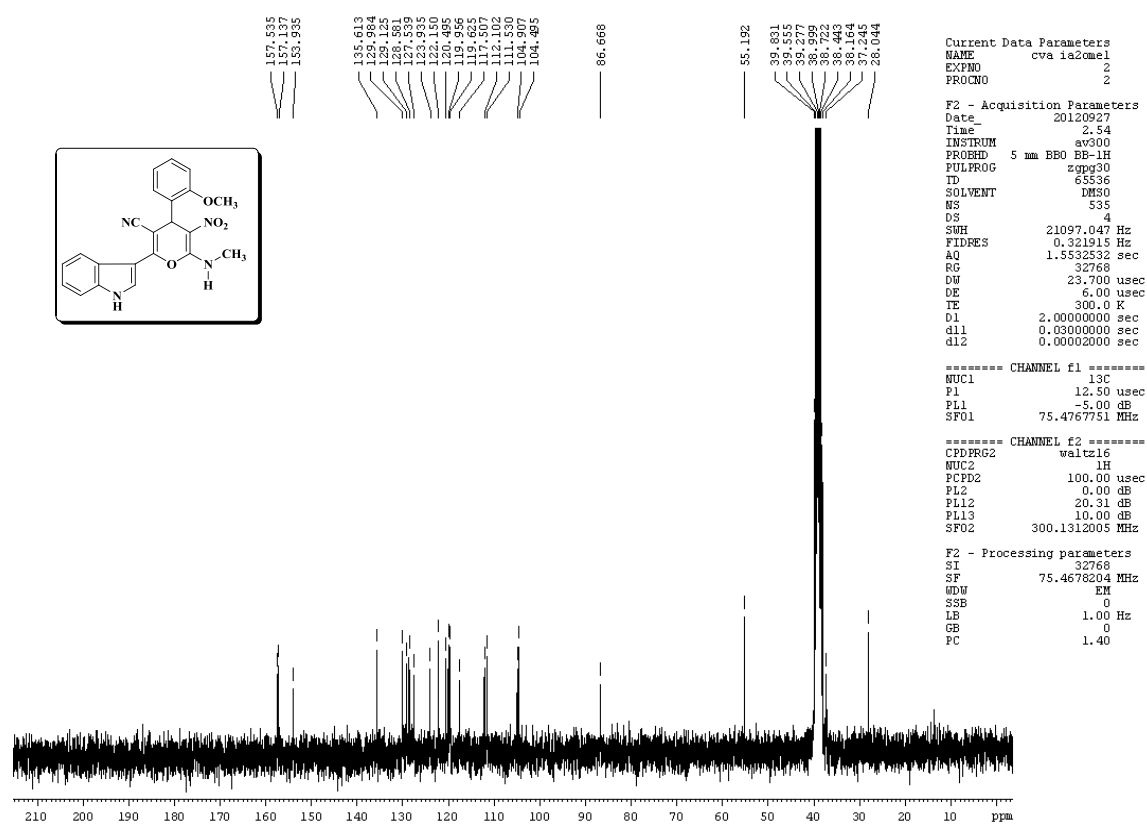

figure 24.  $^{13}\text{C}$  NMR Spectrum of 5j

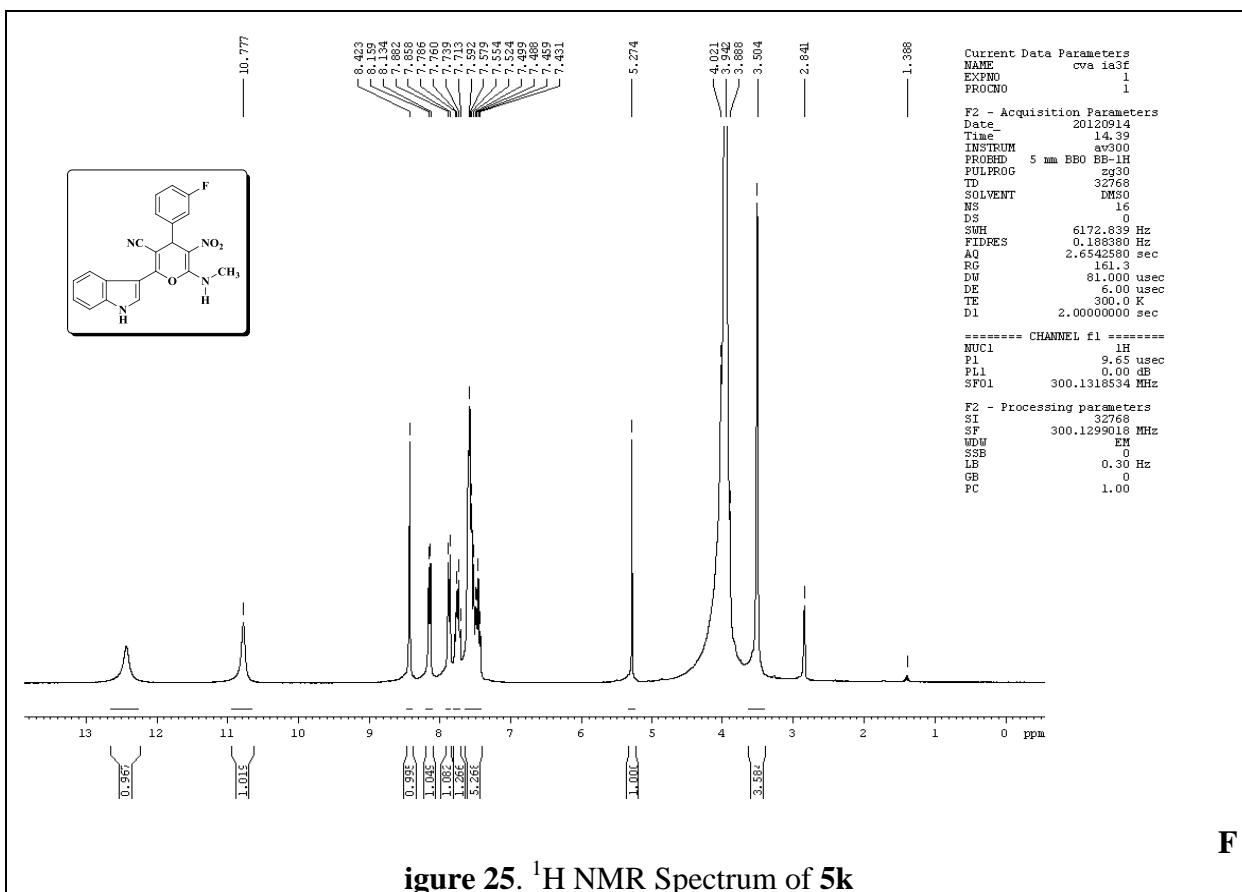

figure 25. <sup>1</sup>H NMR Spectrum of 5k

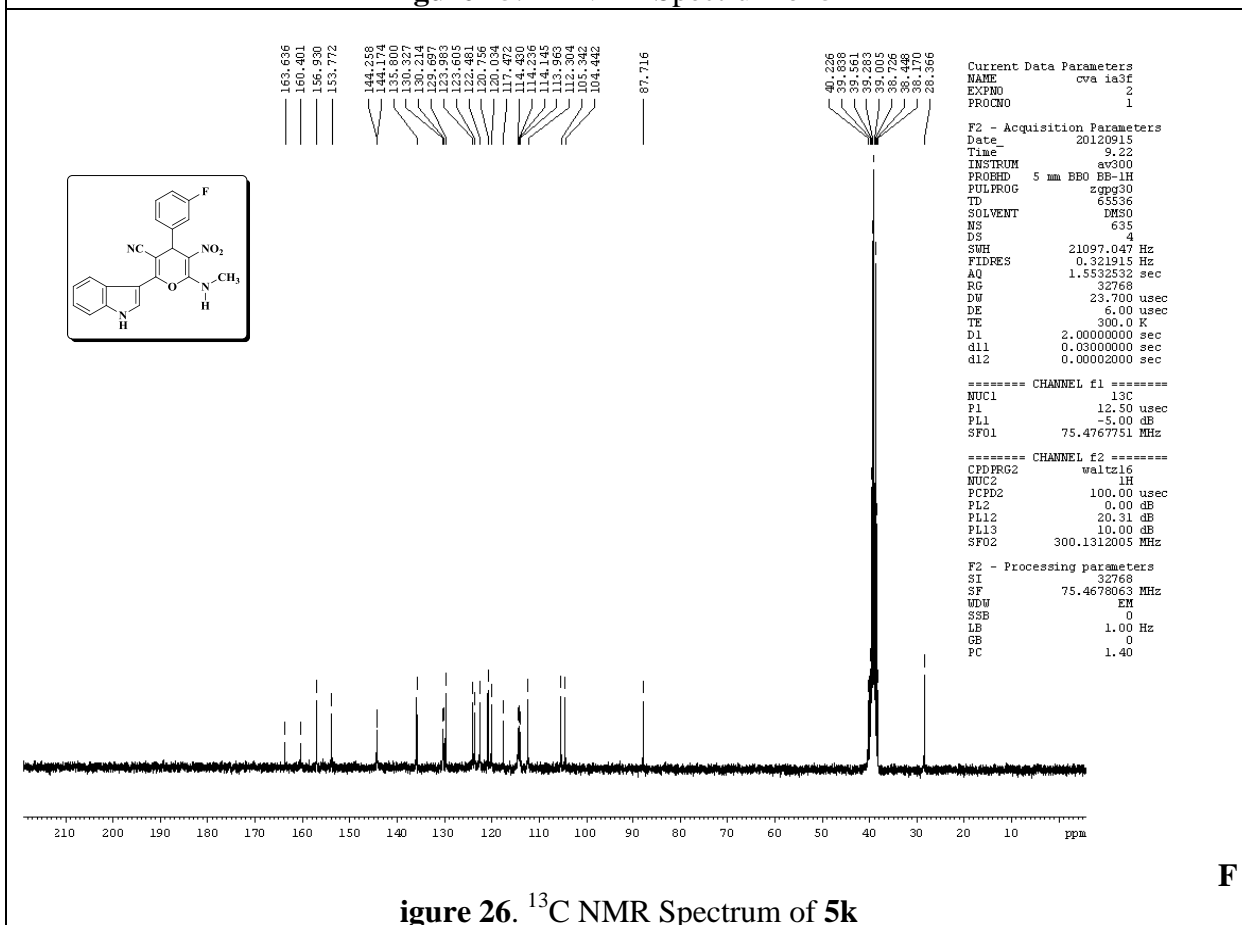

figure 26. <sup>13</sup>C NMR Spectrum of 5k

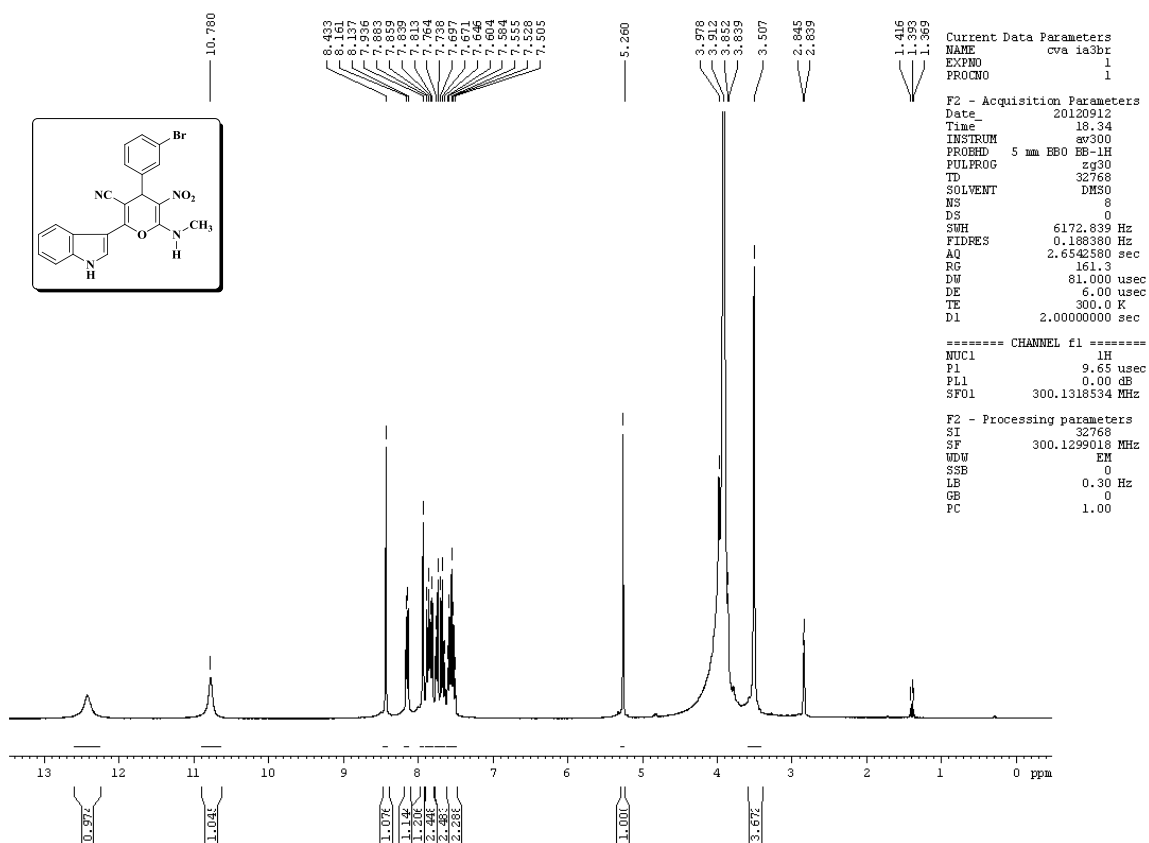

figure 27.  $^1\text{H}$  NMR Spectrum of 51

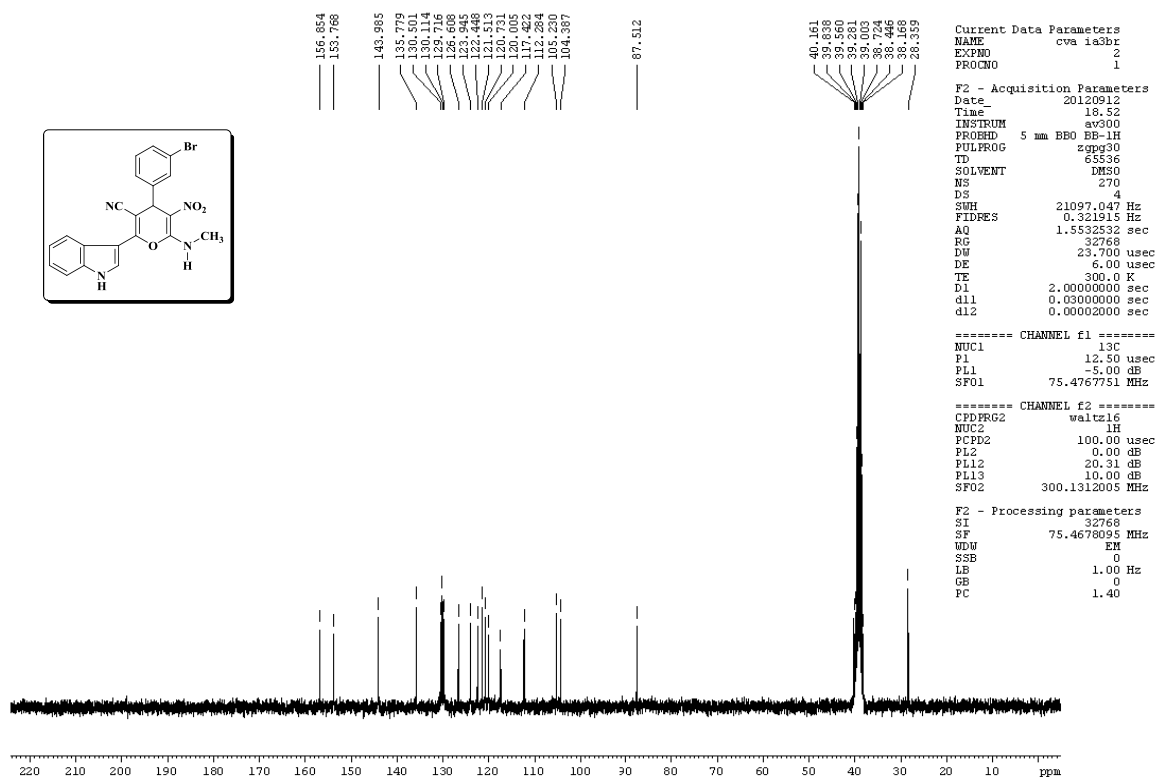

figure 28.  $^{13}\text{C}$  NMR Spectrum of 51

F

F

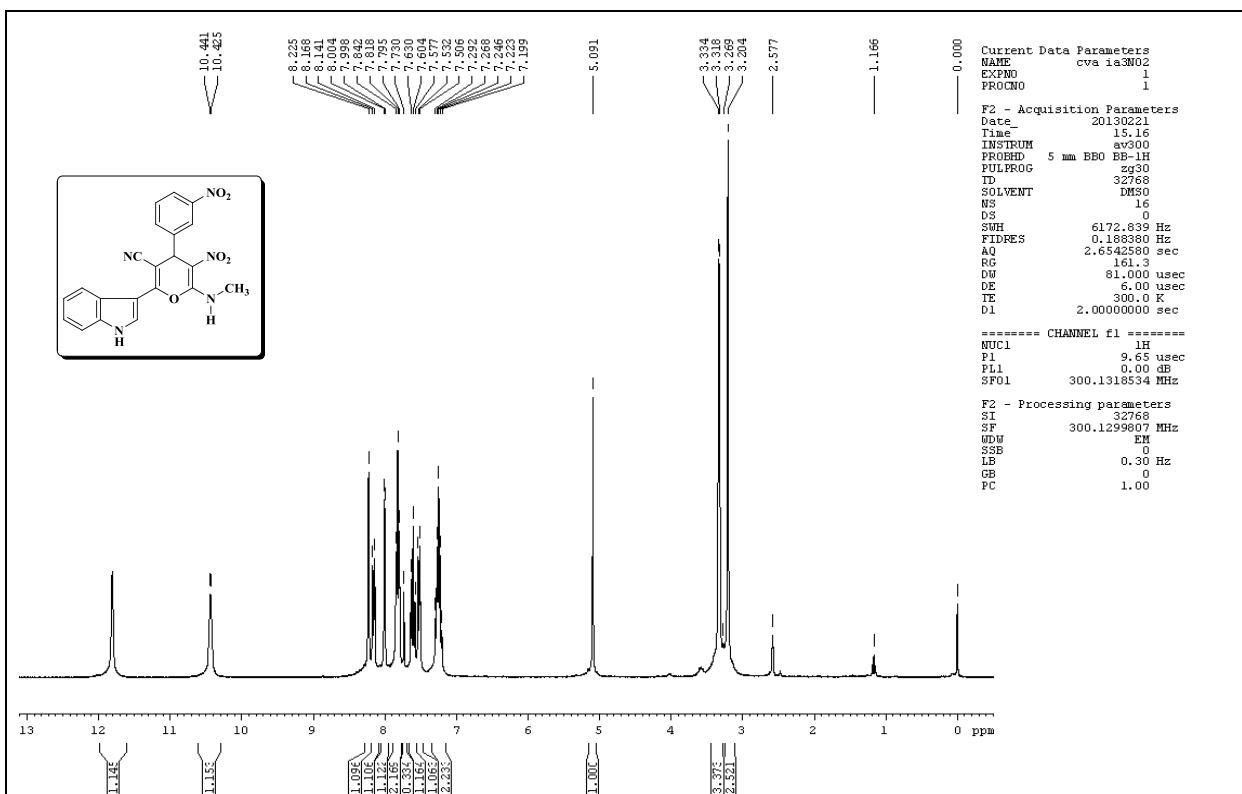

figure 29. <sup>1</sup>H NMR Spectrum of 5m

F

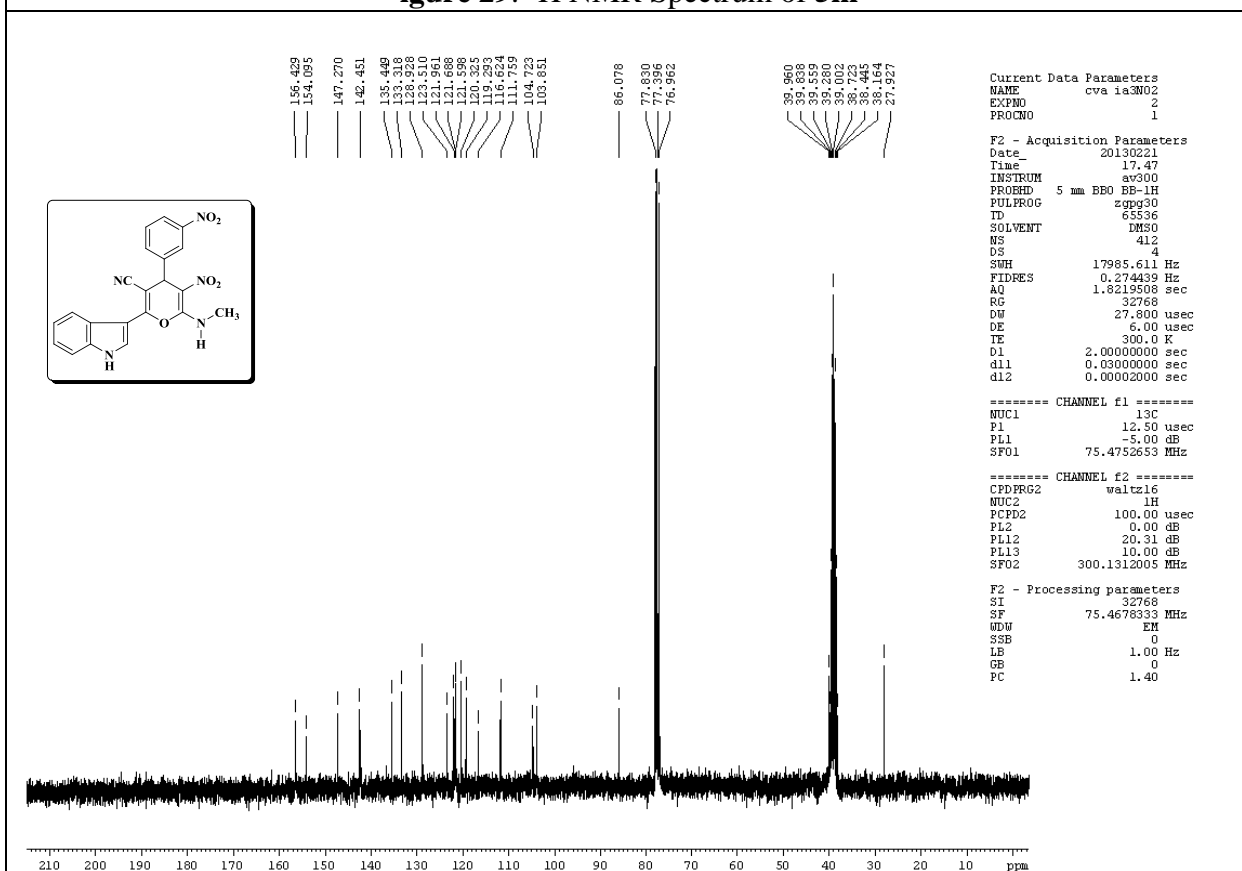

figure 30. <sup>13</sup>C NMR Spectrum of 5m

F

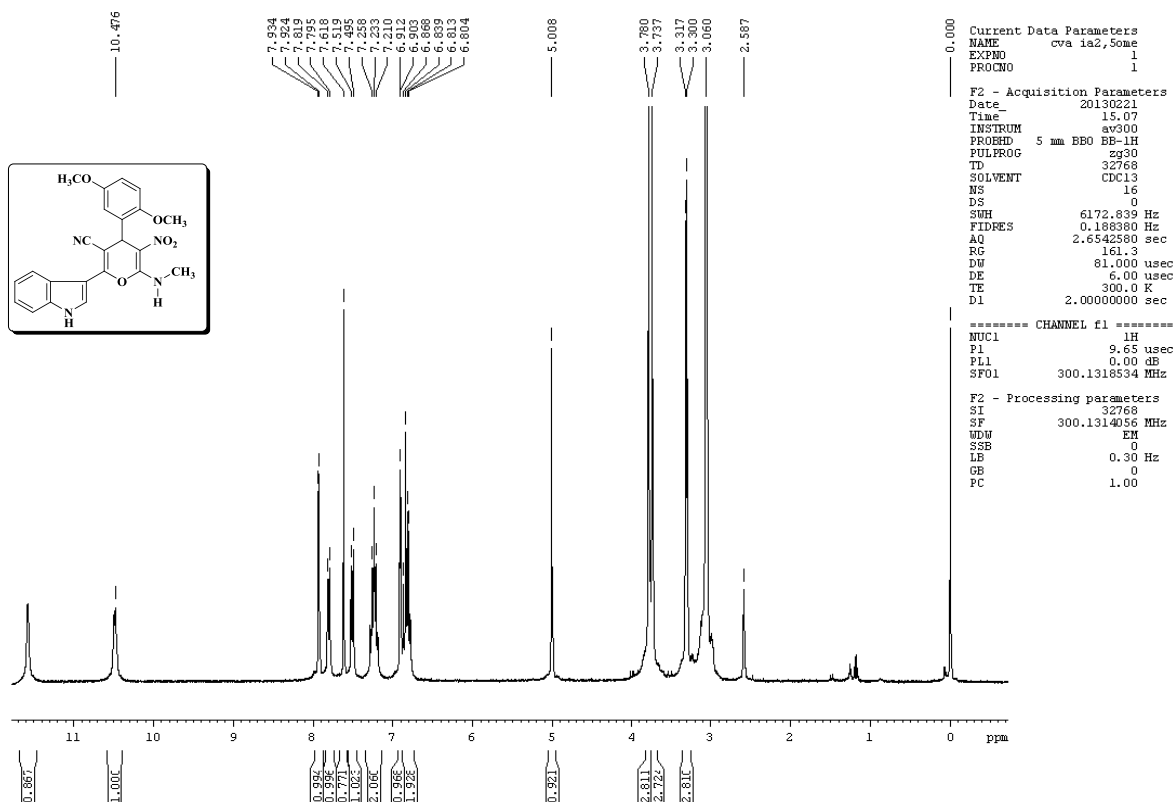

Figure 31. <sup>1</sup>H NMR Spectrum of 5n

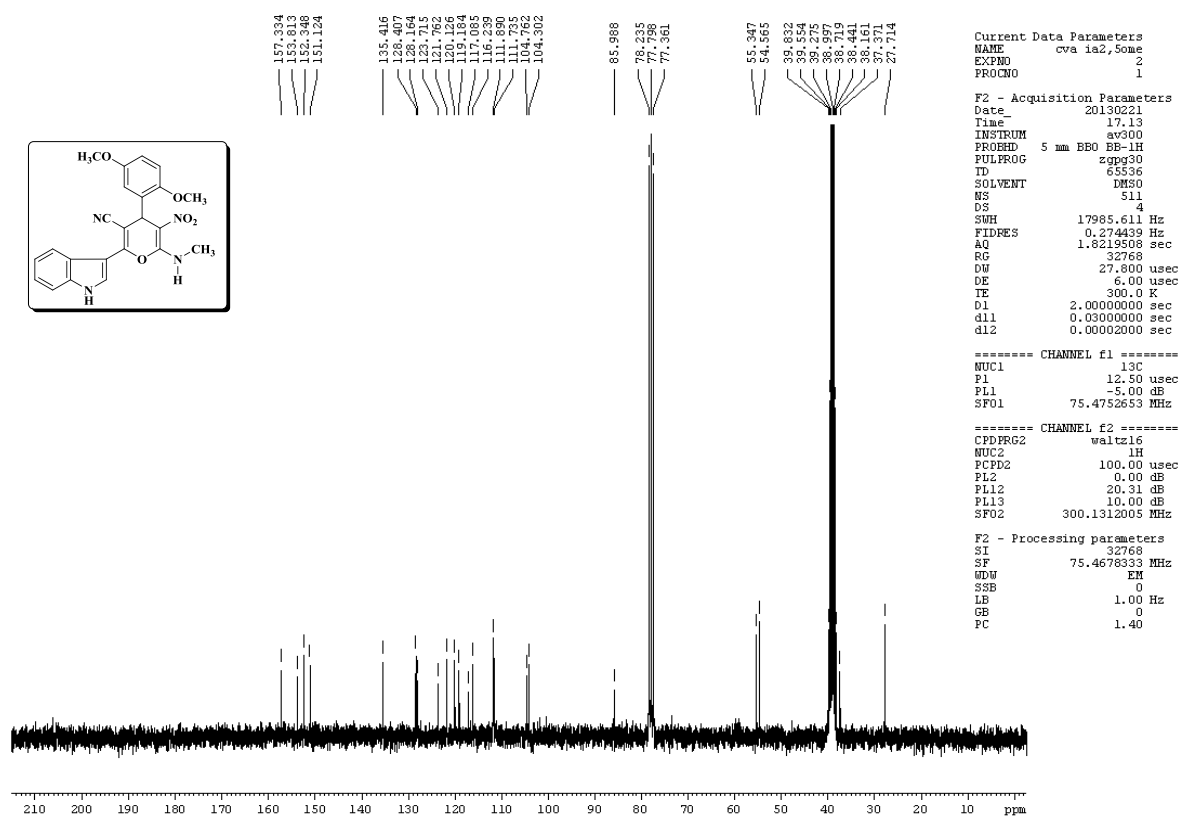

Figure 32. <sup>13</sup>C NMR Spectrum of 5n

F

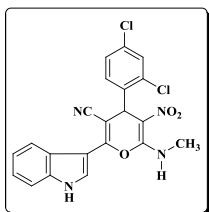

**Figure 33.**  $^1\text{H}$  NMR Spectrum of **5o**

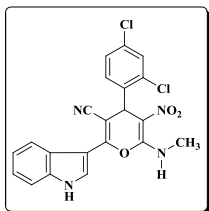

**Figure 34.**  $^{13}\text{C}$  NMR Spectrum of **5o**

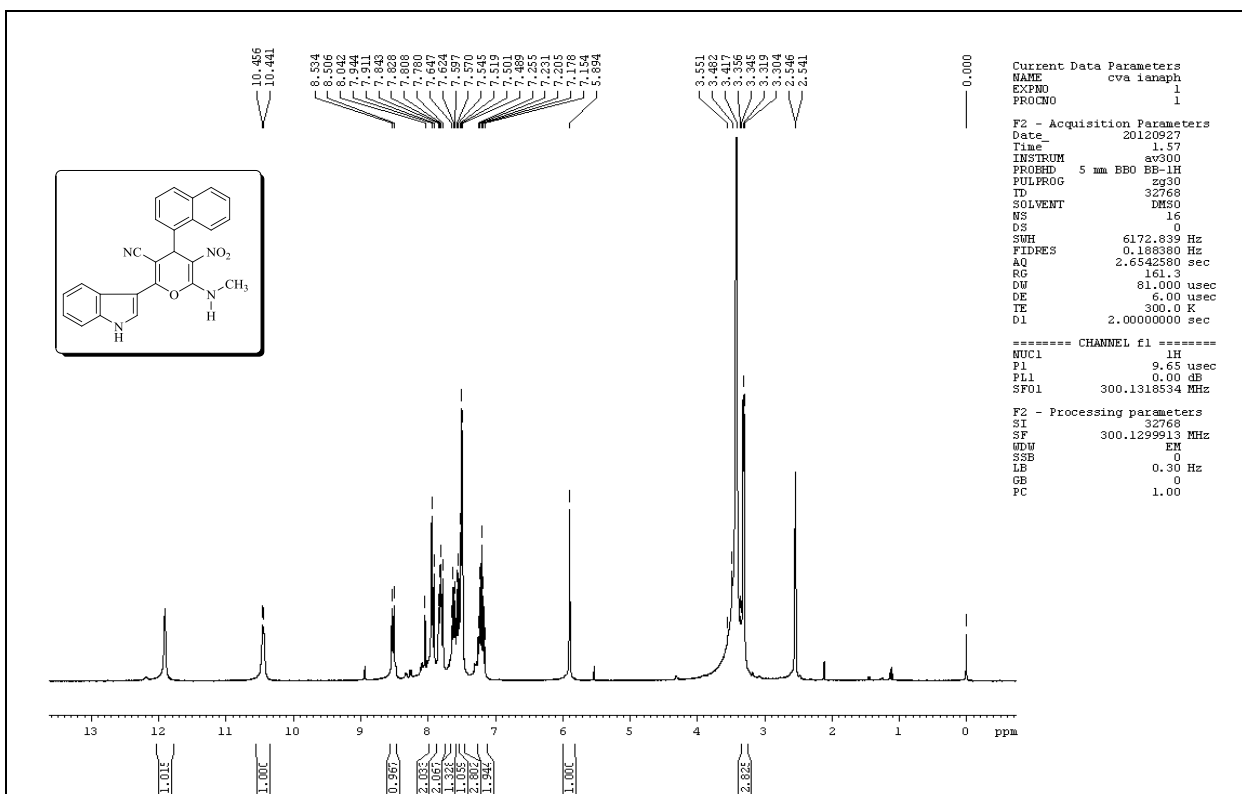

**Figure 35.**  $^1\text{H}$  NMR Spectrum of **5p**

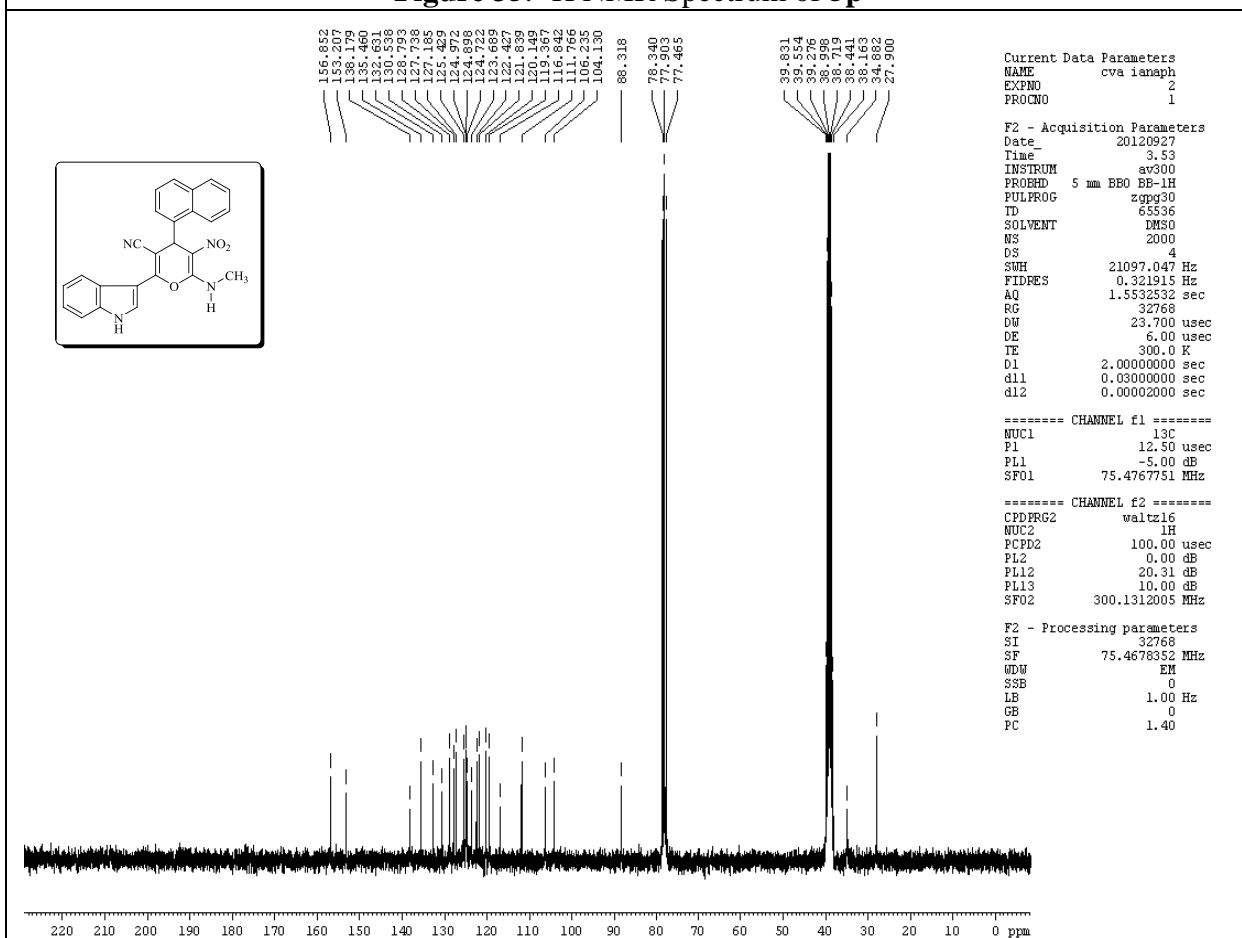

**Figure 36.**  $^{13}\text{C}$  NMR Spectrum of **5p**

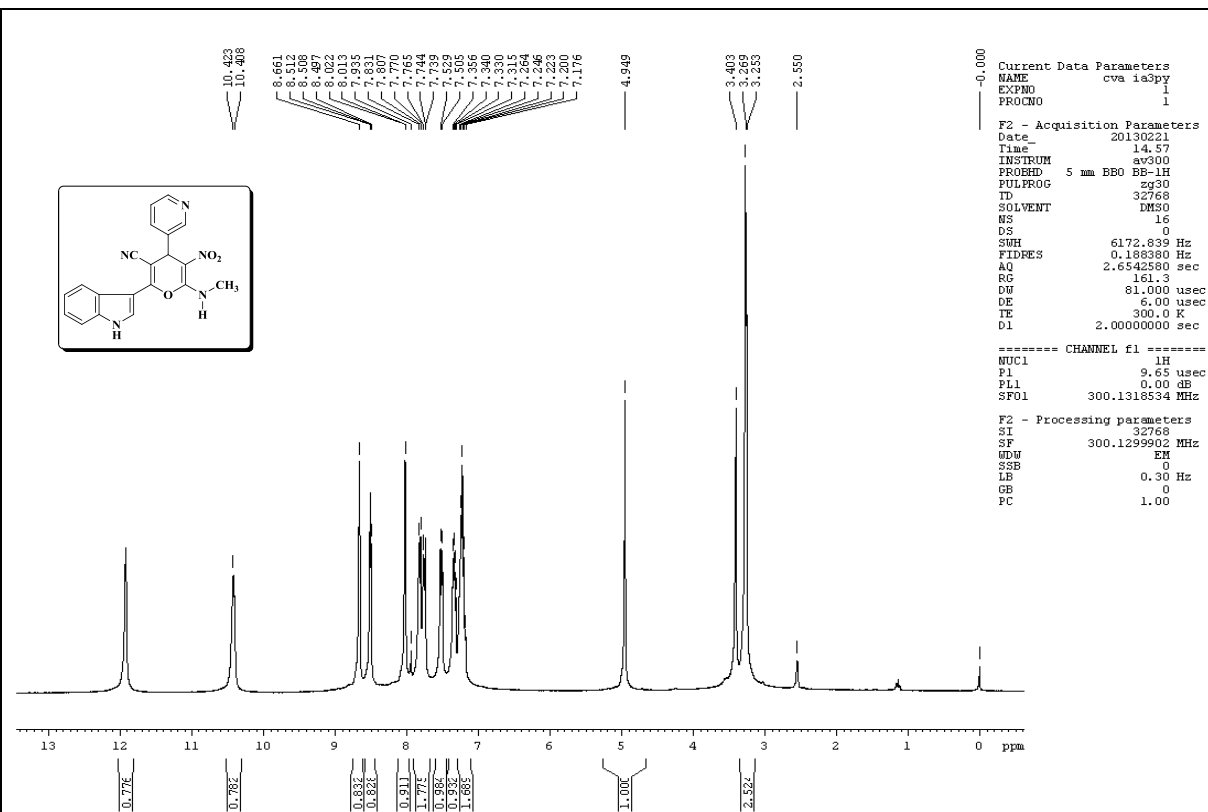

figure 37. <sup>1</sup>H NMR Spectrum of 5q

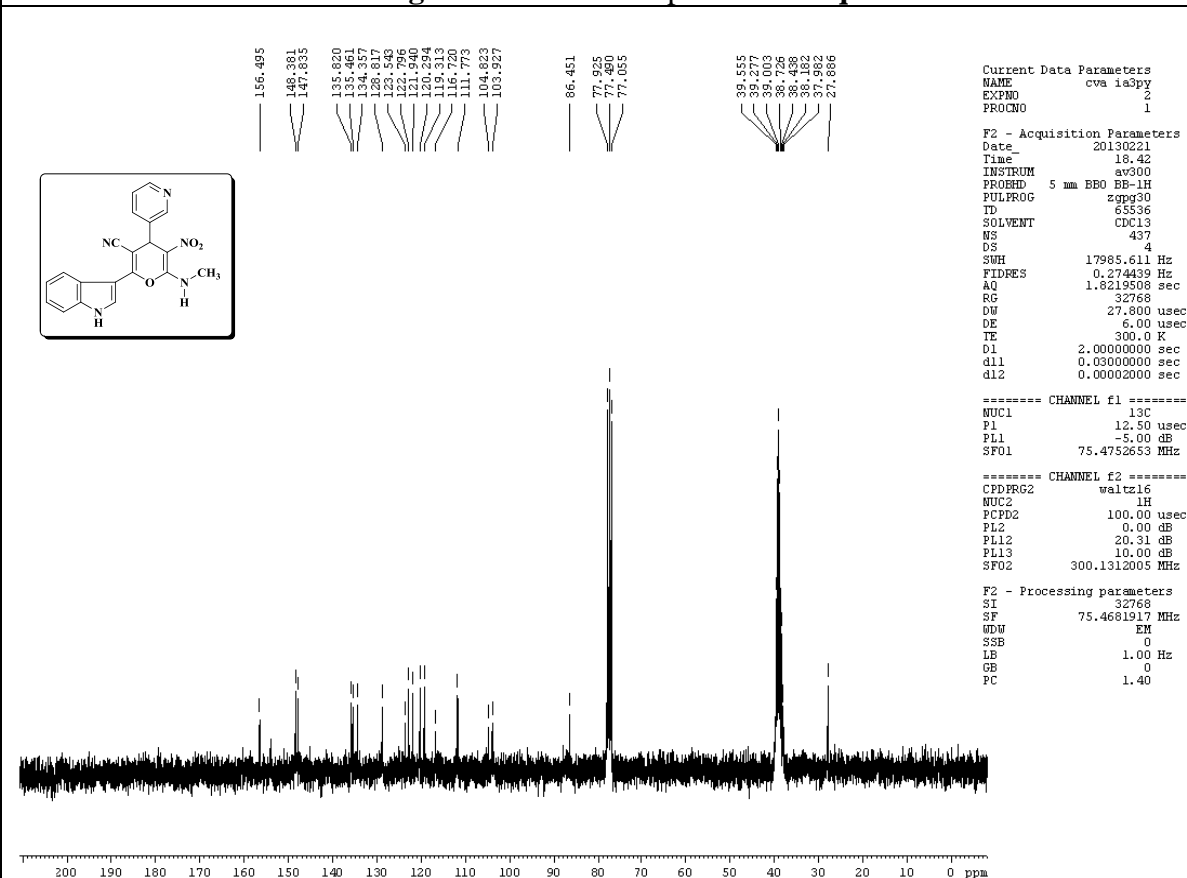

figure 38. <sup>13</sup>C NMR Spectrum of 5q

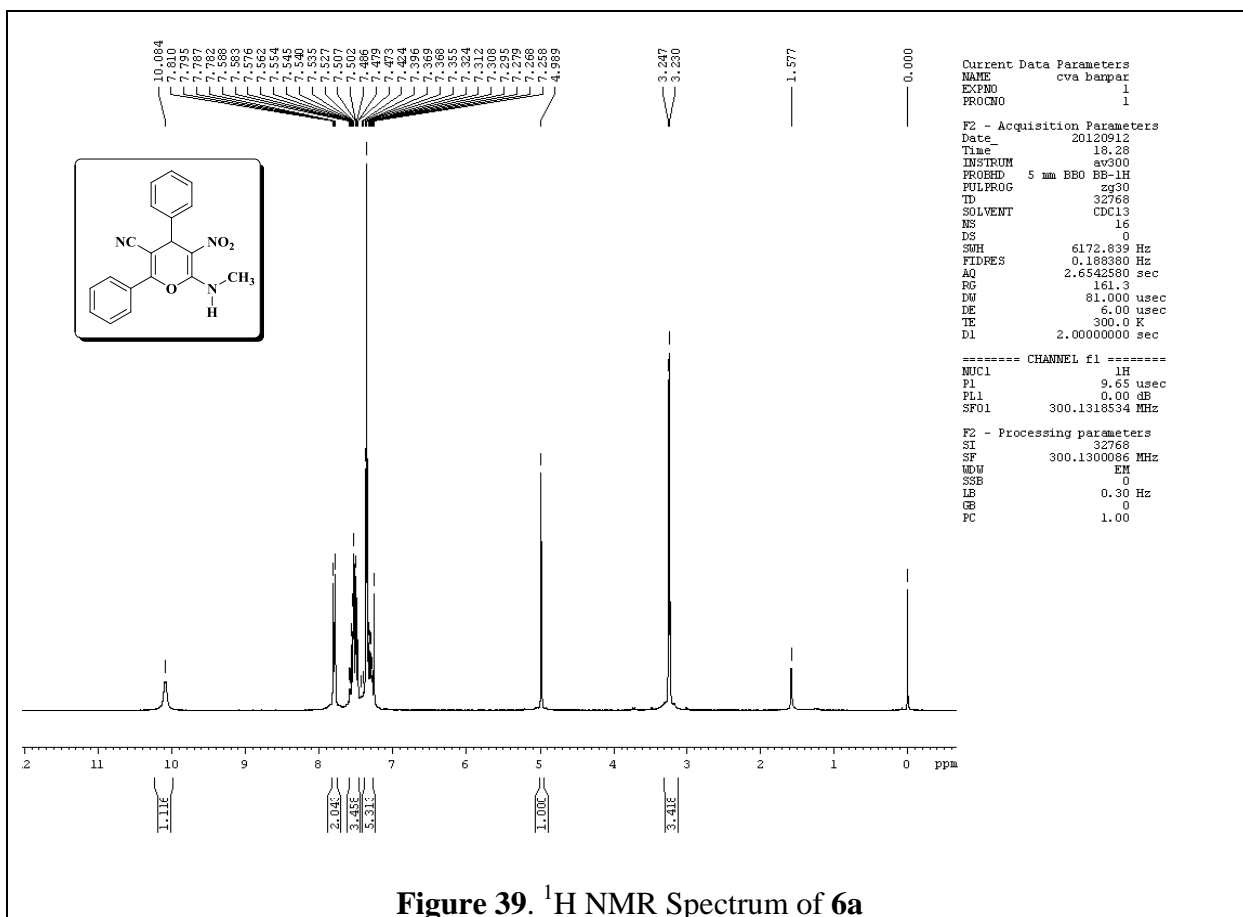

Figure 39. <sup>1</sup>H NMR Spectrum of 6a

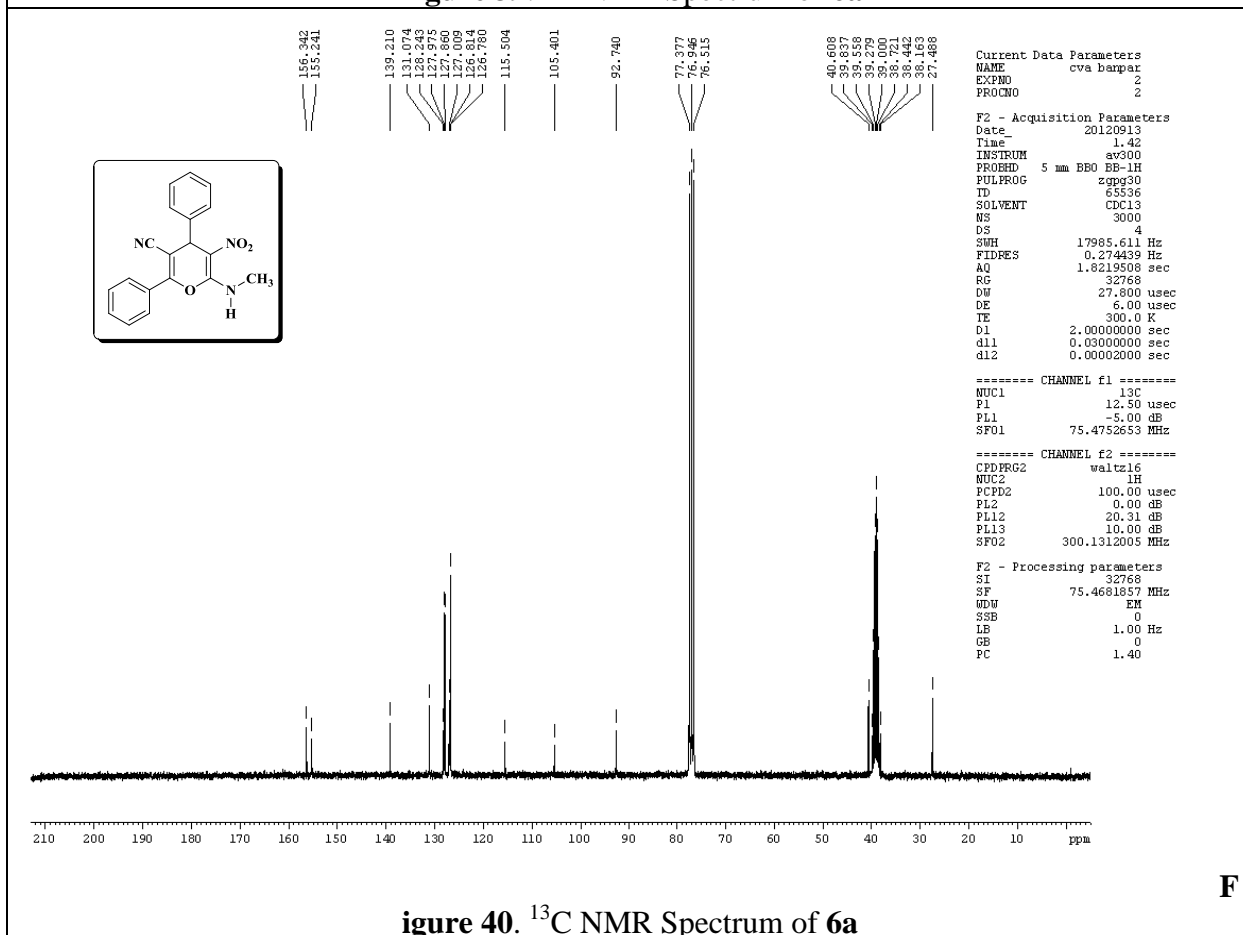

Figure 40. <sup>13</sup>C NMR Spectrum of 6a

F

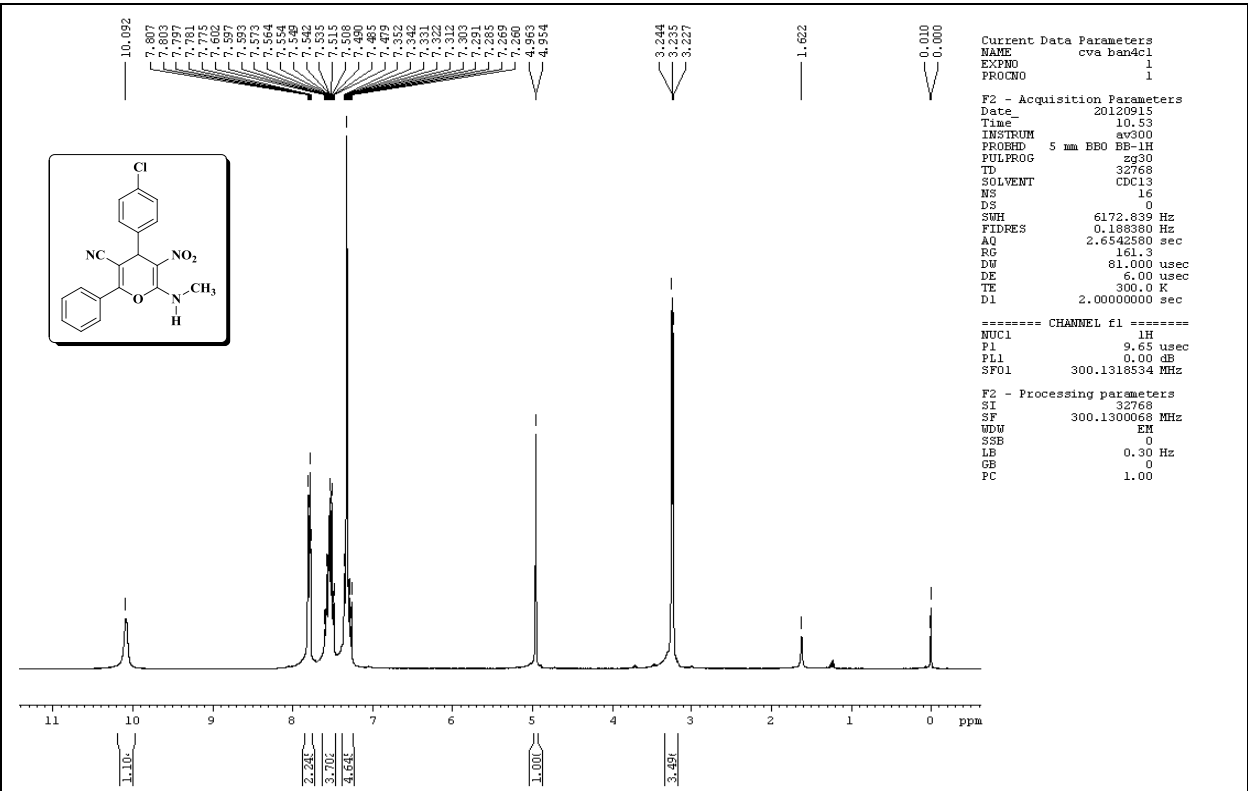

Figure 41. <sup>1</sup>H NMR Spectrum of 6b

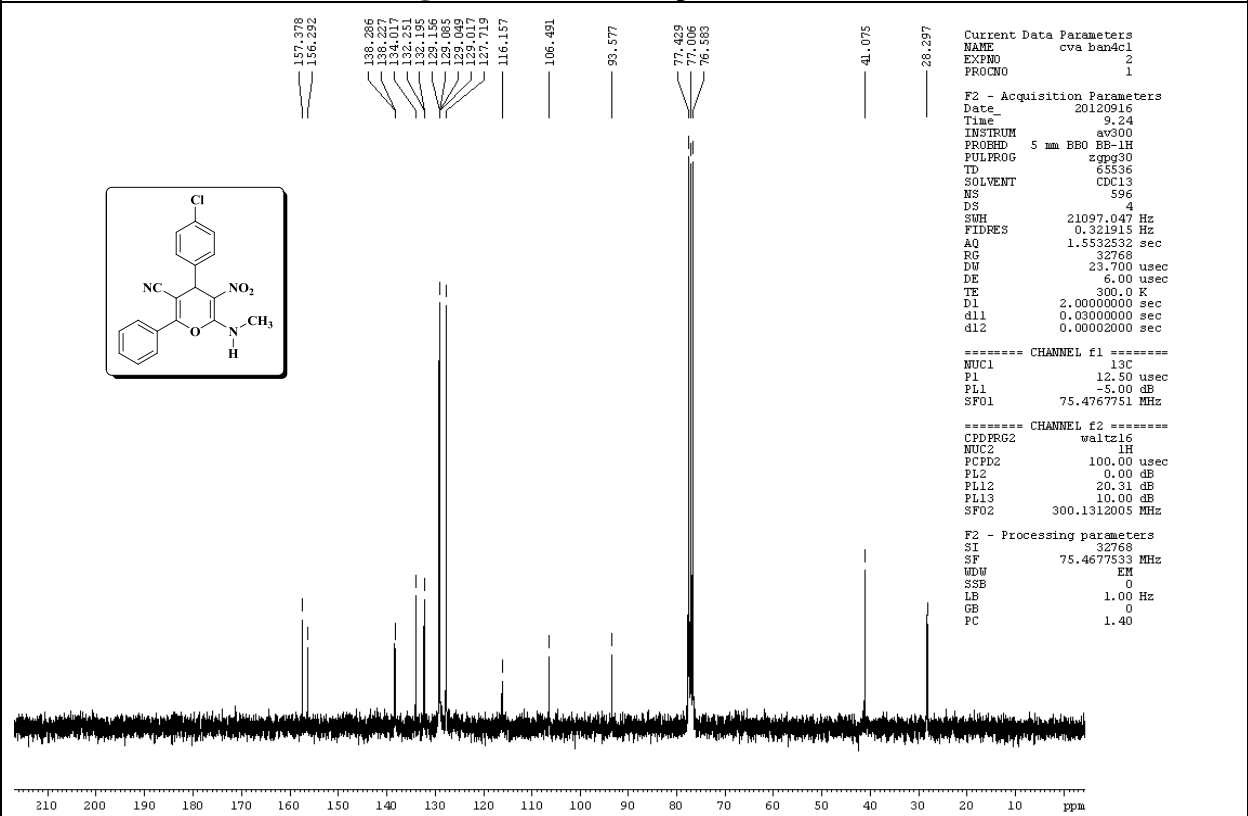

Figure 42. <sup>13</sup>C NMR Spectrum of 6b

F

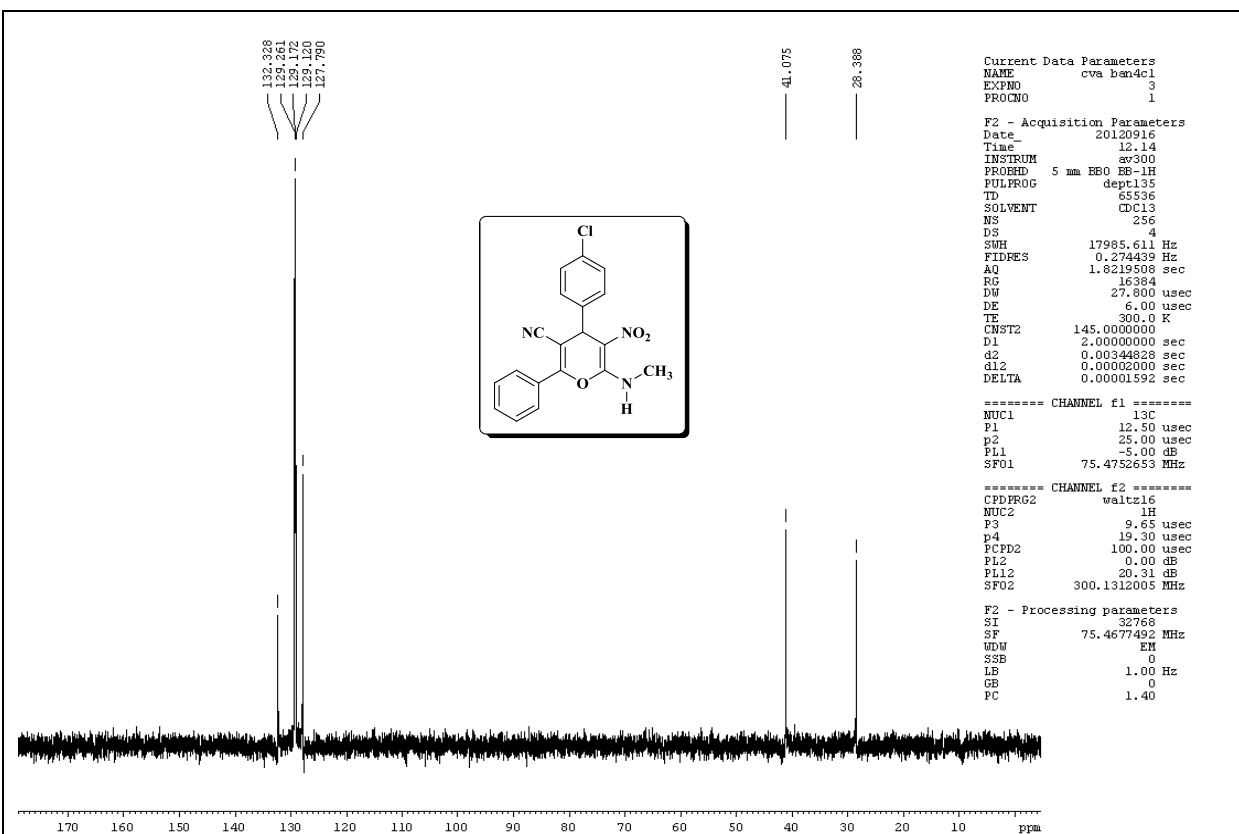

Figure 43. DEPT 135 NMR spectrum of 6b

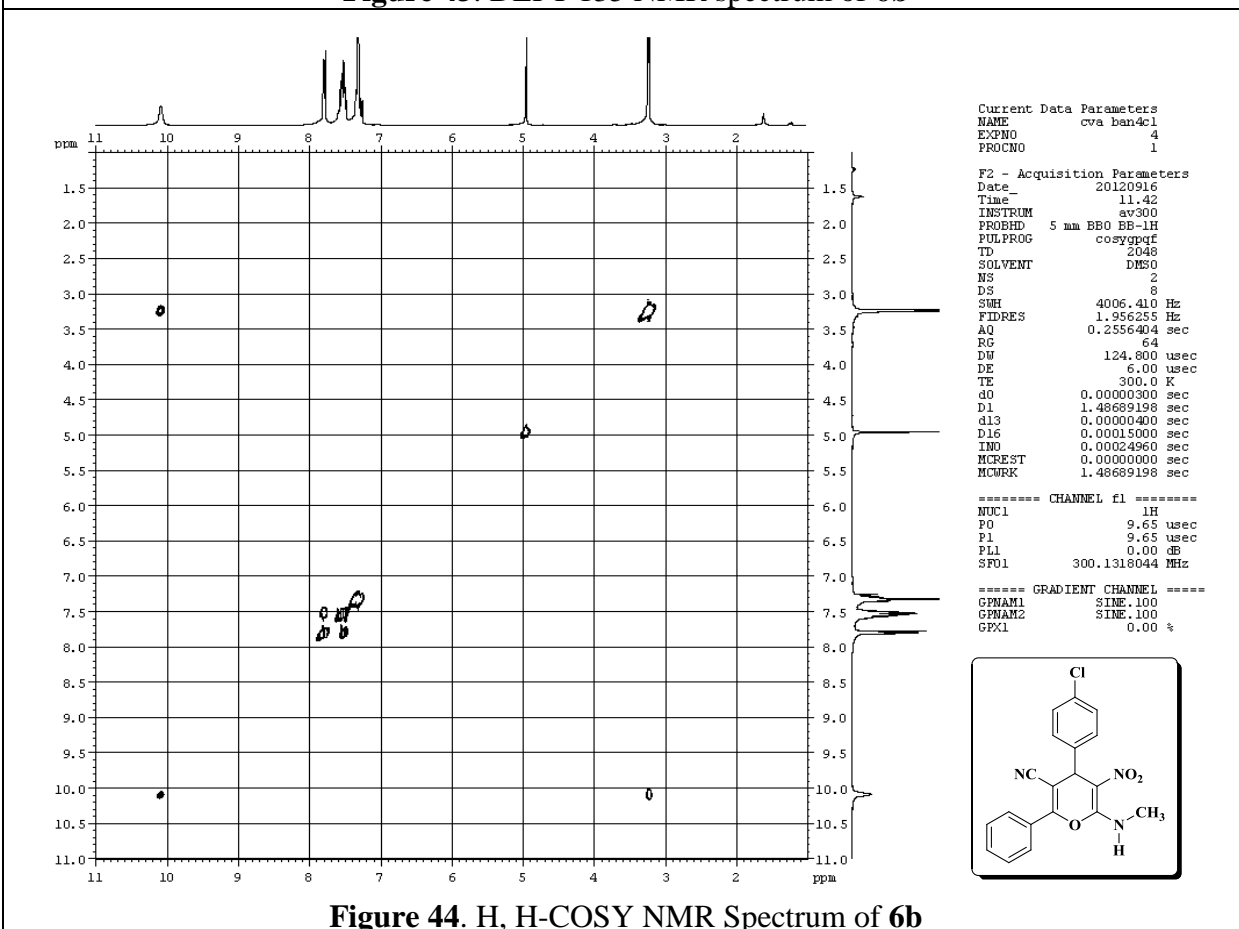

Figure 44. H, H-COSY NMR Spectrum of 6b

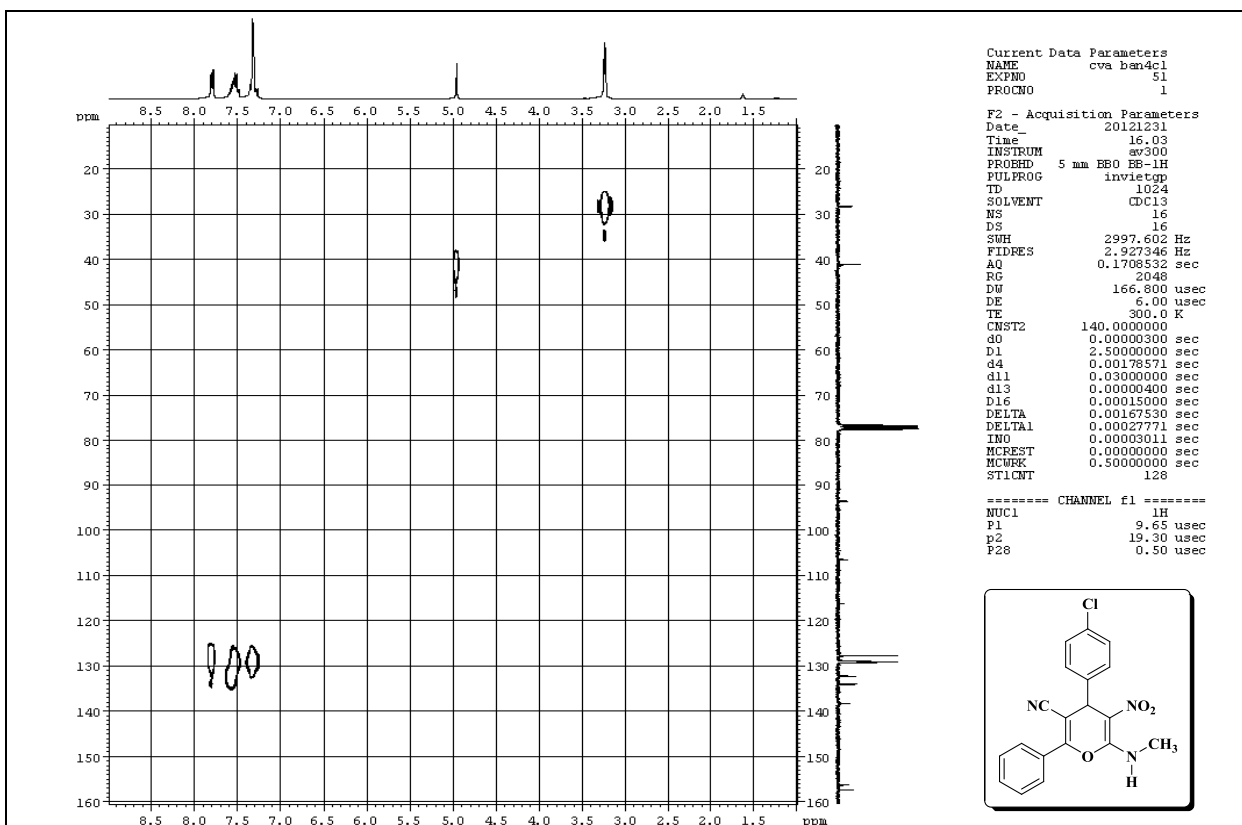

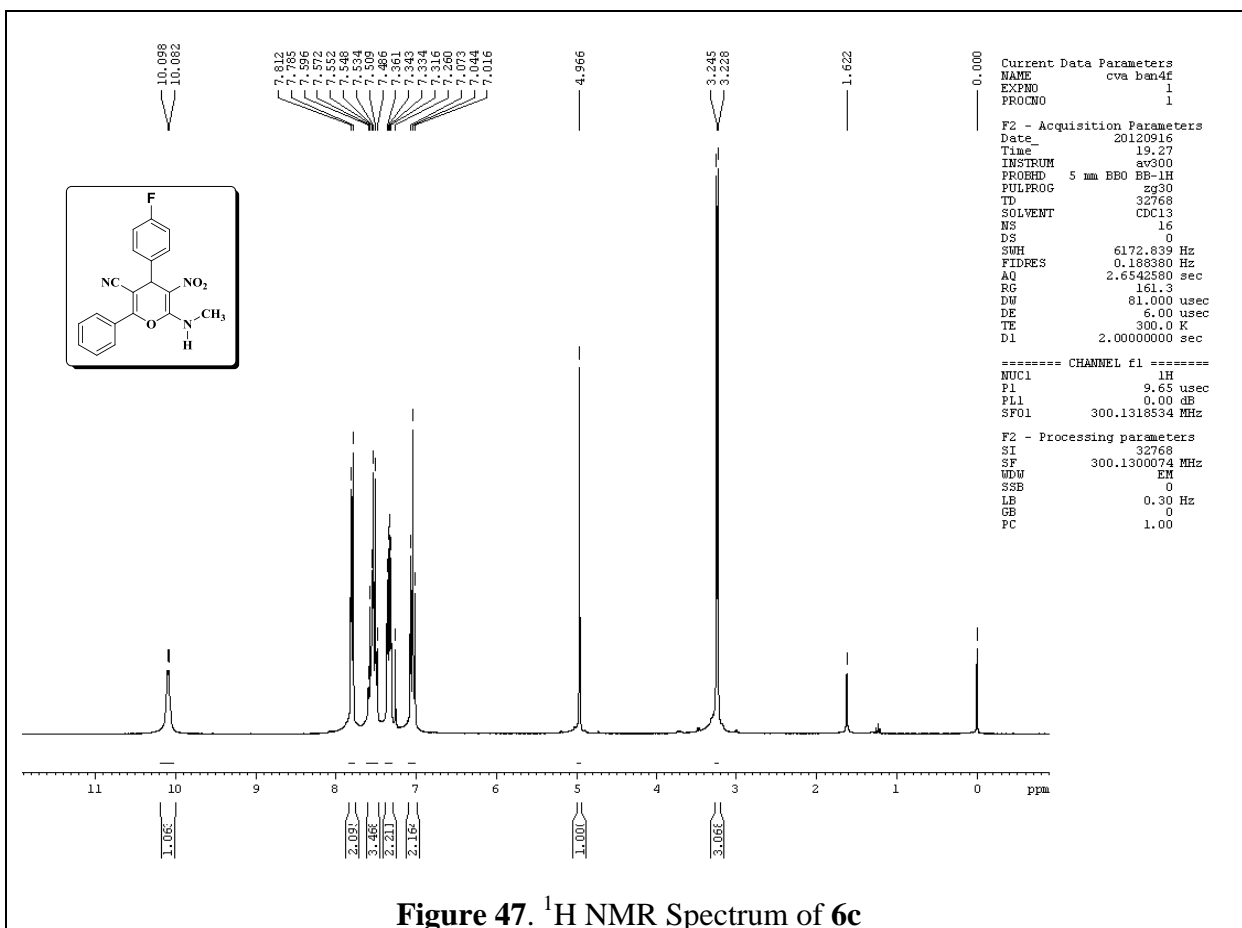

Figure 47. <sup>1</sup>H NMR Spectrum of 6c

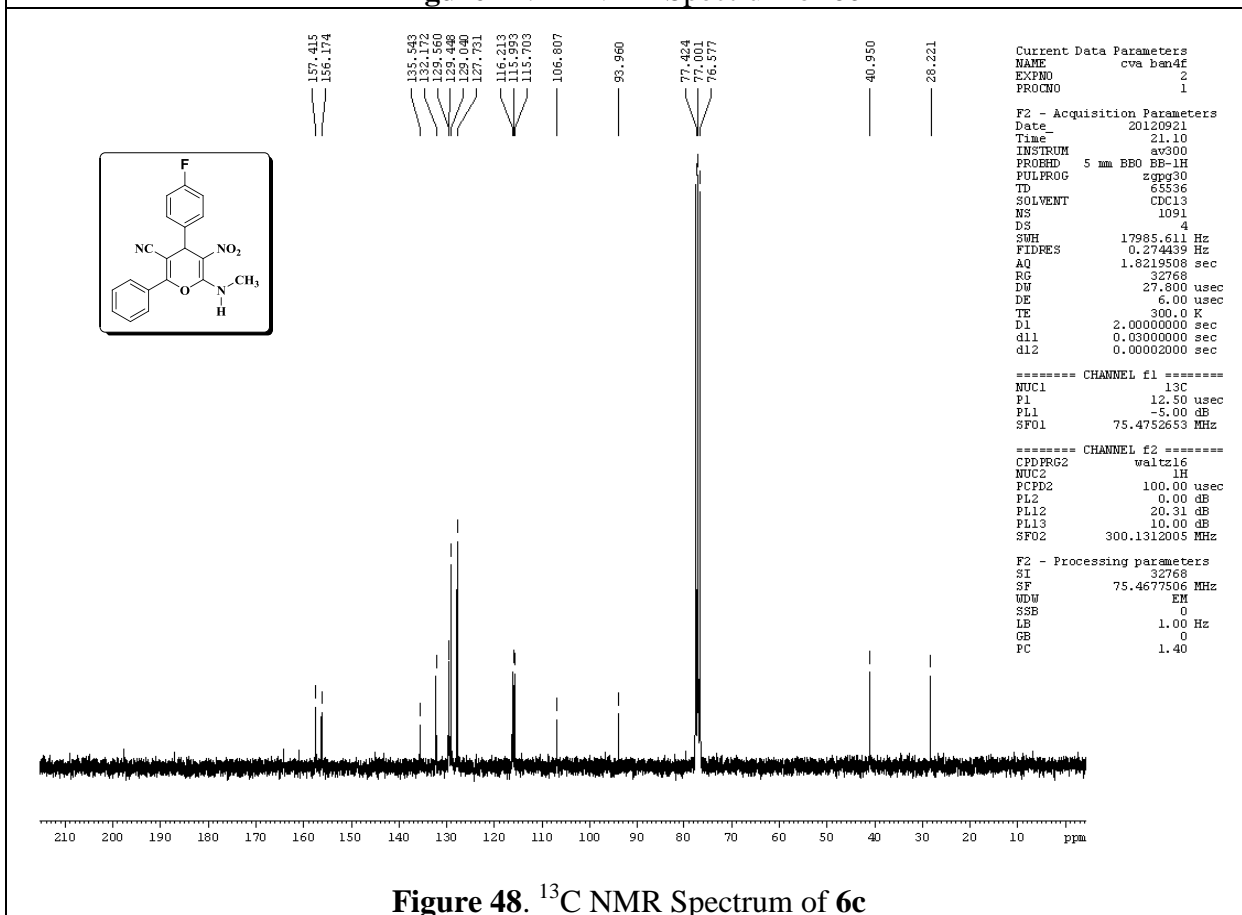

Figure 48. <sup>13</sup>C NMR Spectrum of 6c

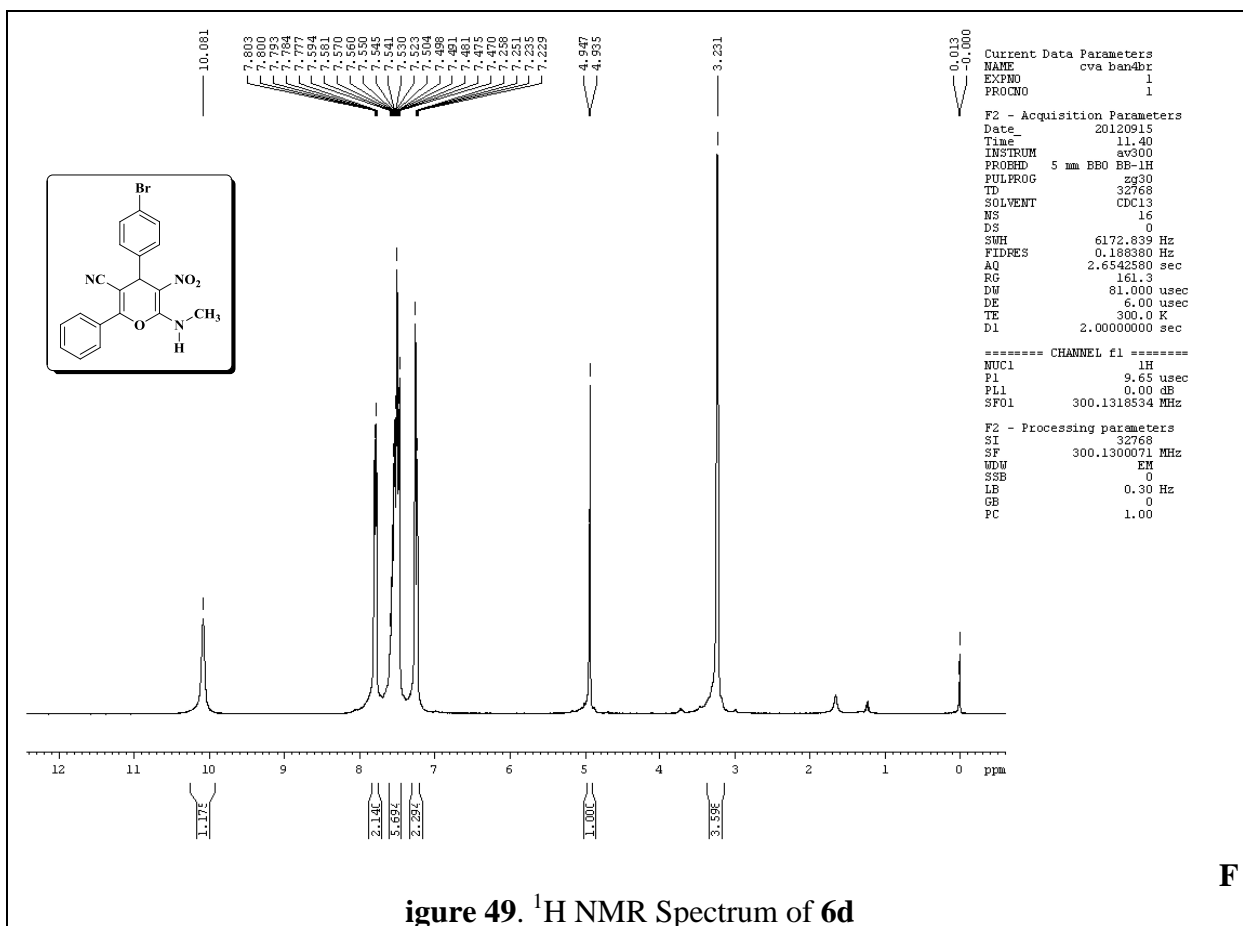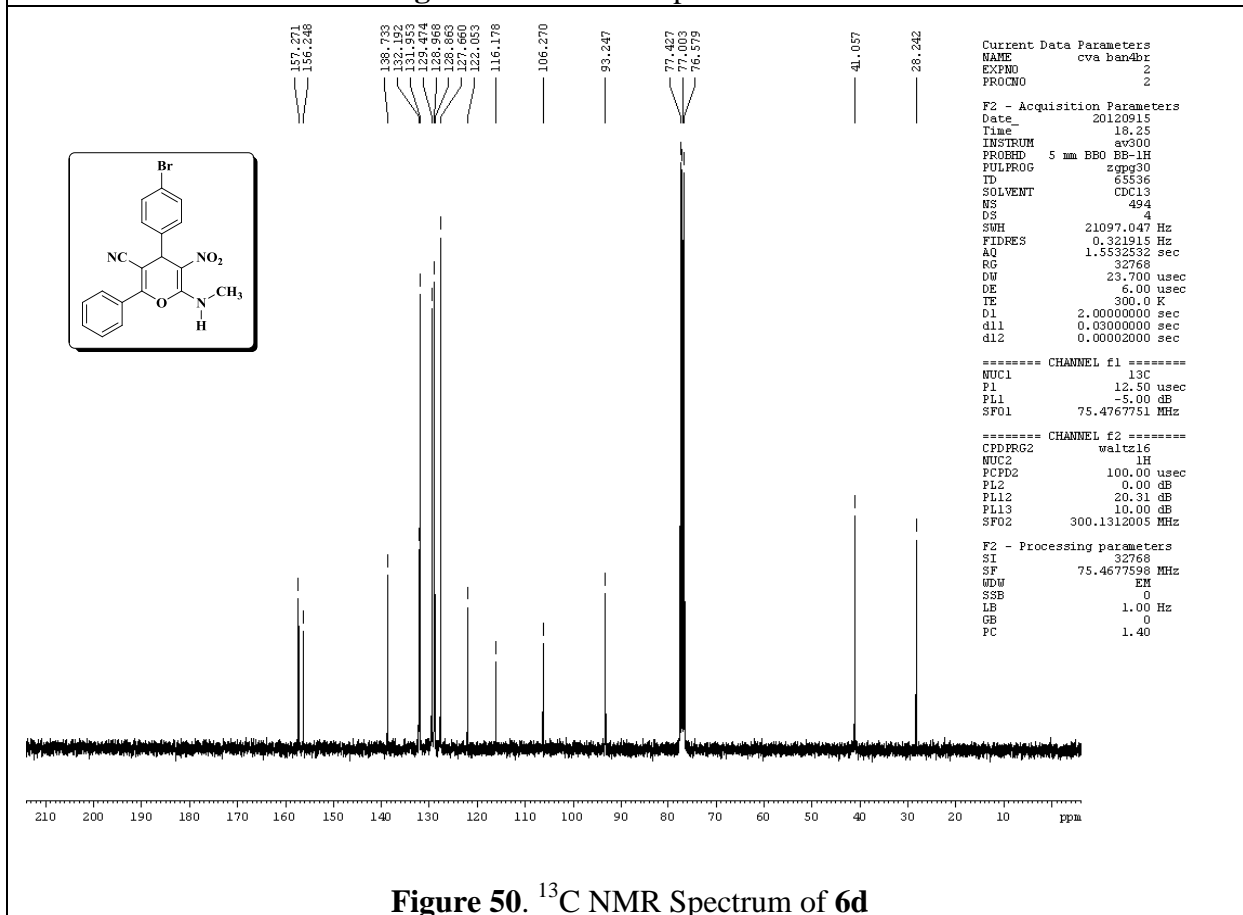

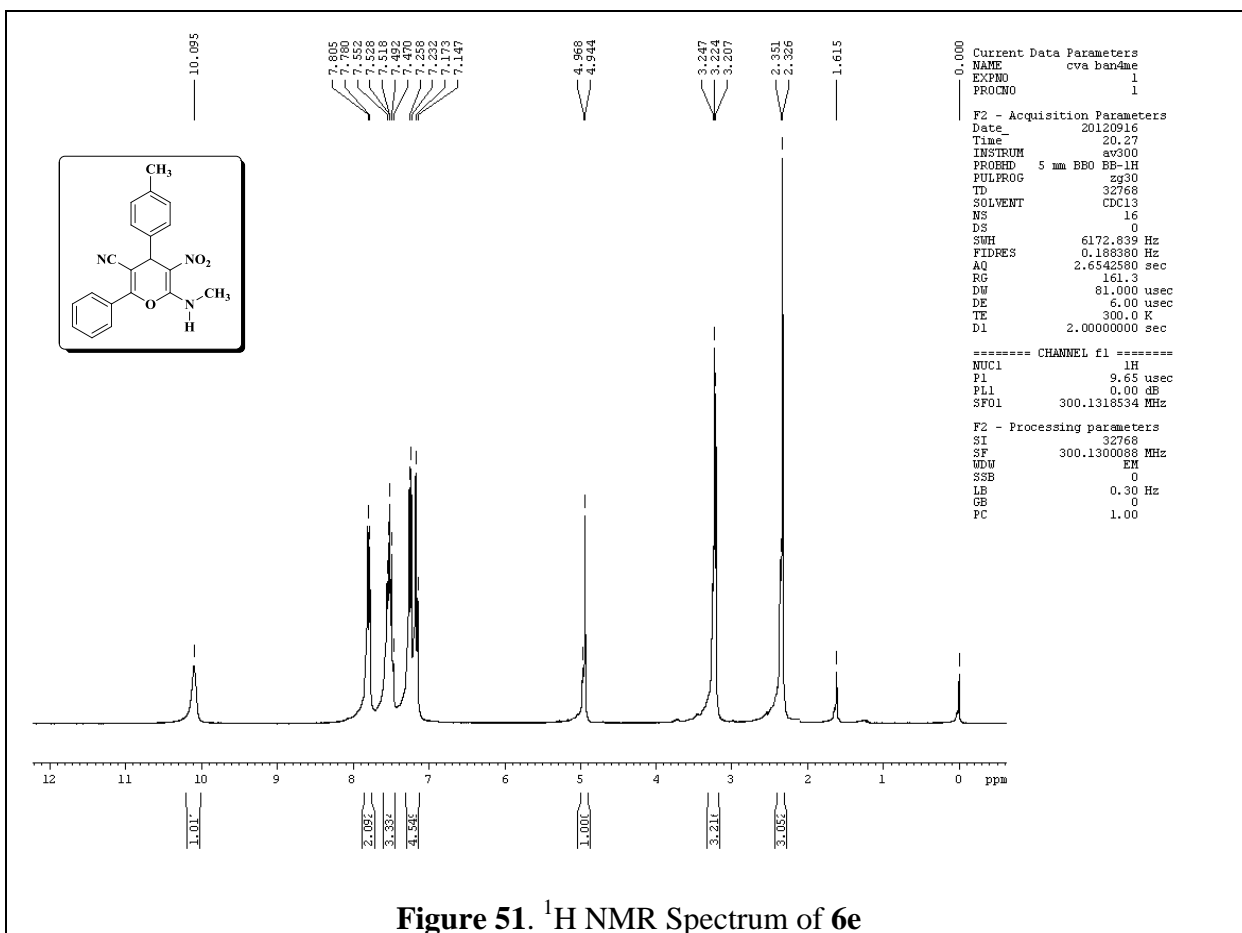

Figure 51. <sup>1</sup>H NMR Spectrum of 6e

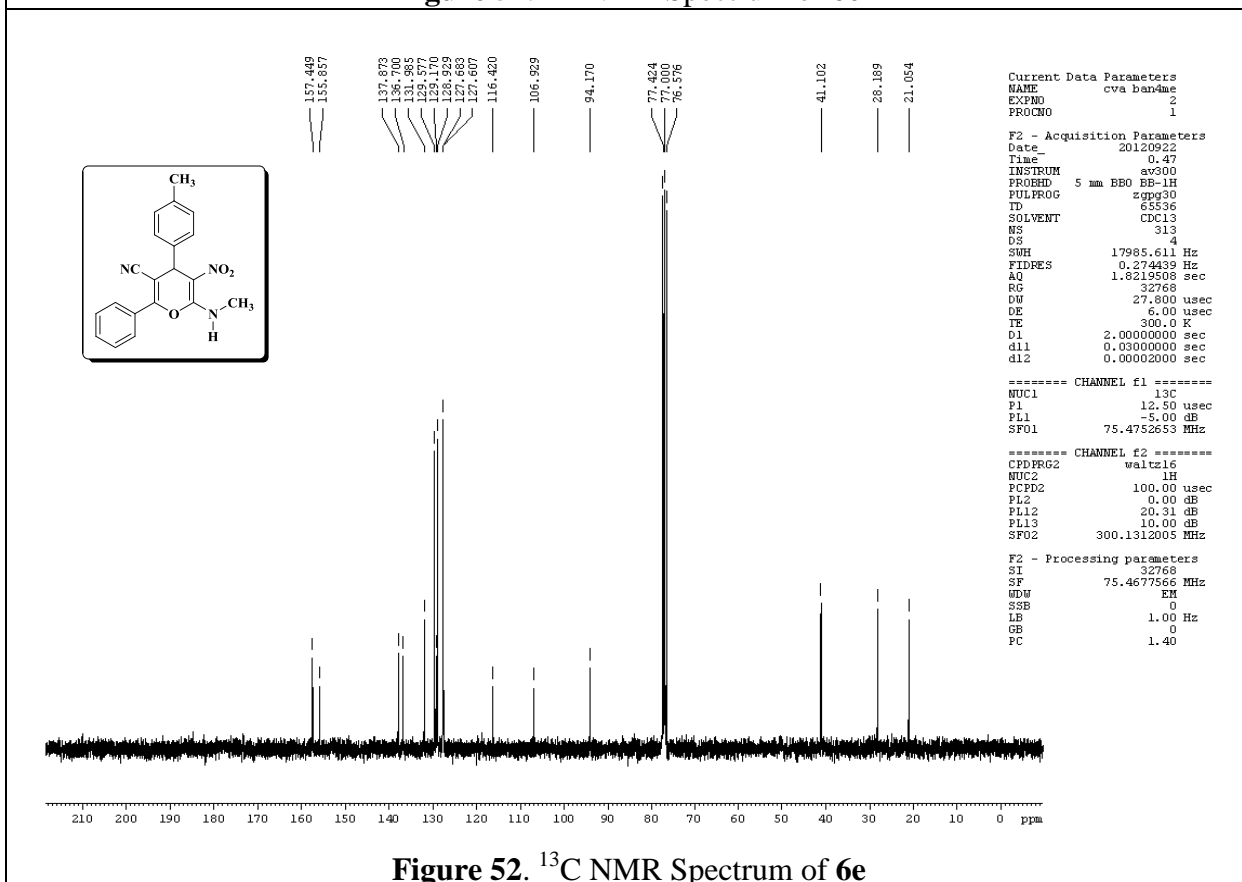

Figure 52. <sup>13</sup>C NMR Spectrum of 6e

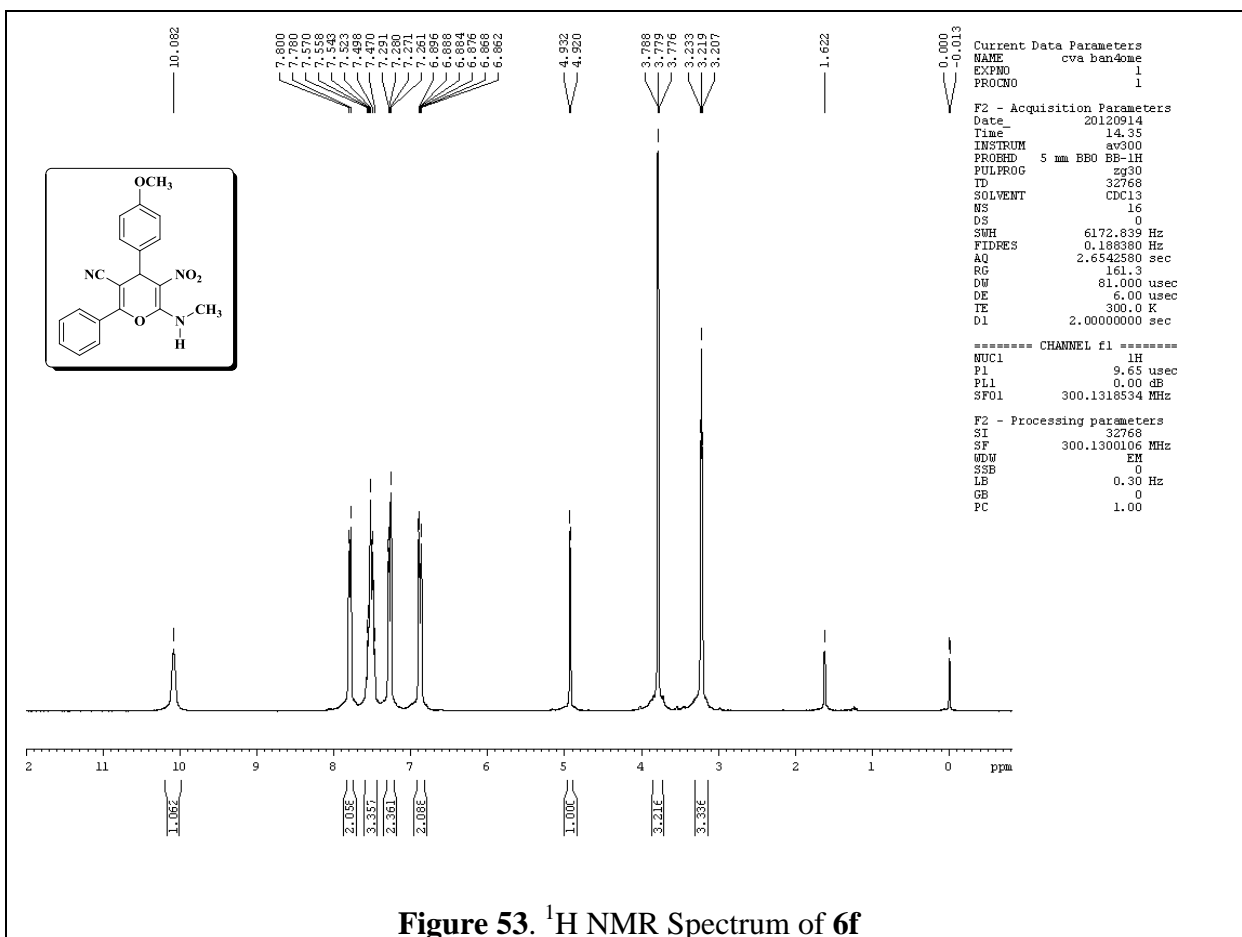

Figure 53. <sup>1</sup>H NMR Spectrum of 6f

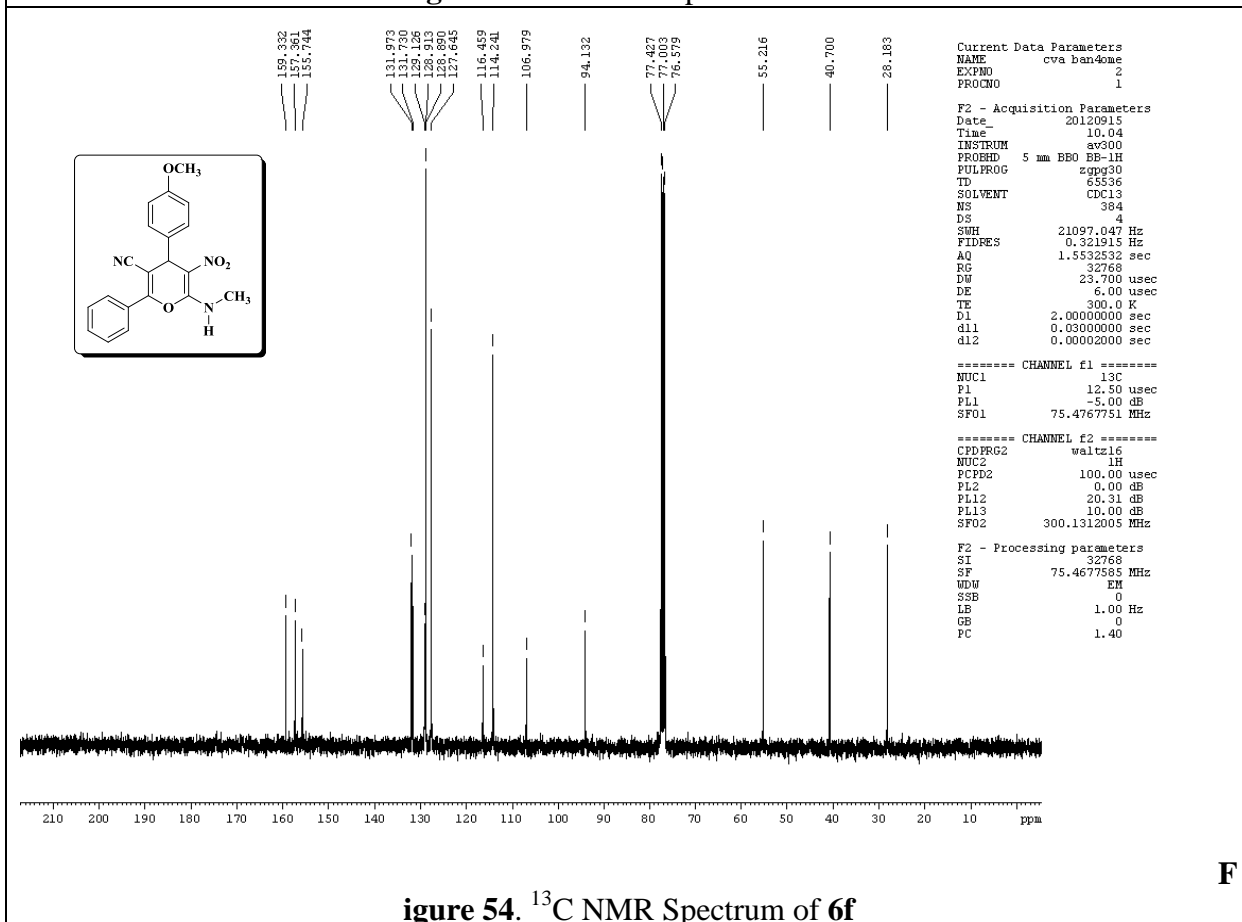

Figure 54. <sup>13</sup>C NMR Spectrum of 6f

F

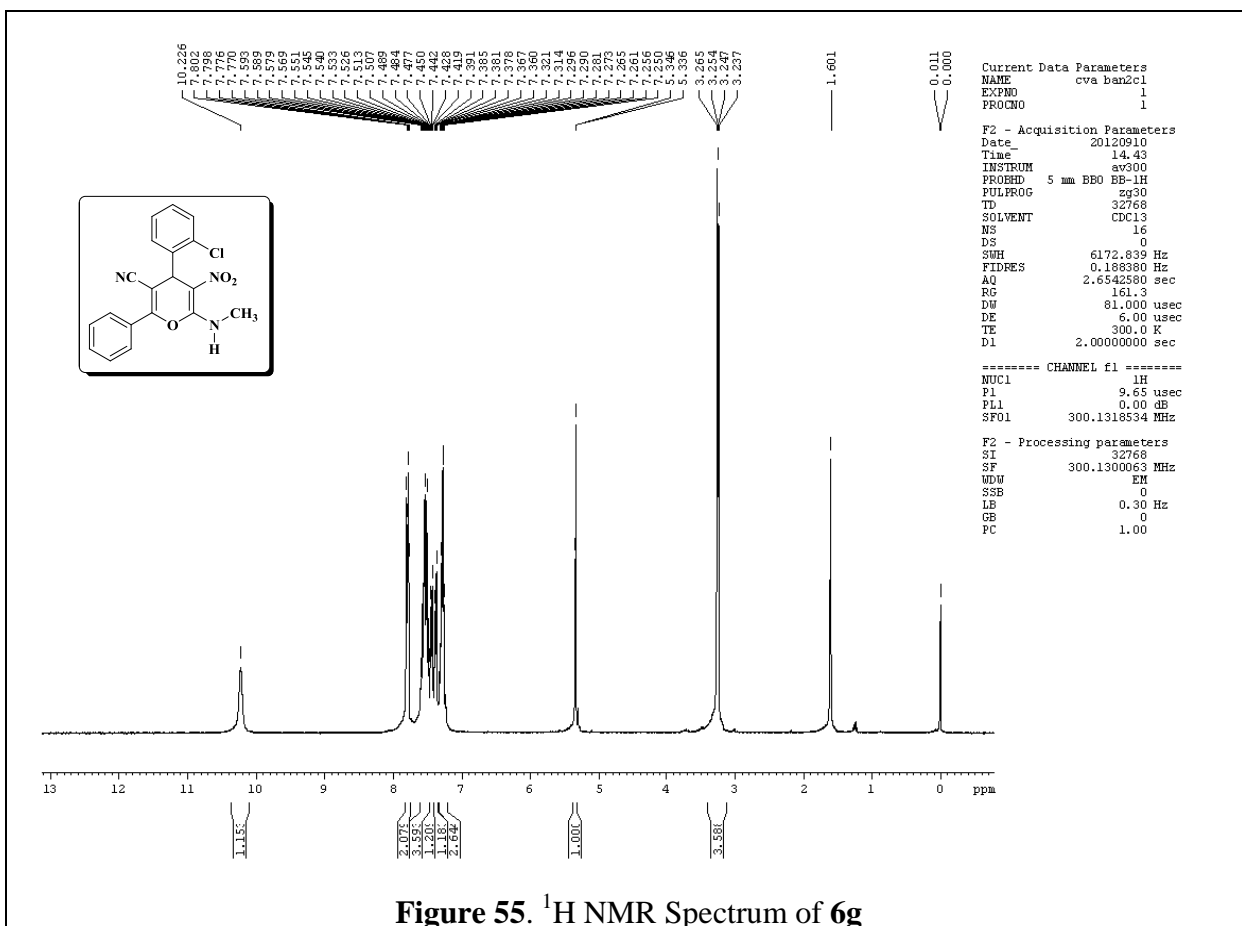

Figure 55. <sup>1</sup>H NMR Spectrum of 6g

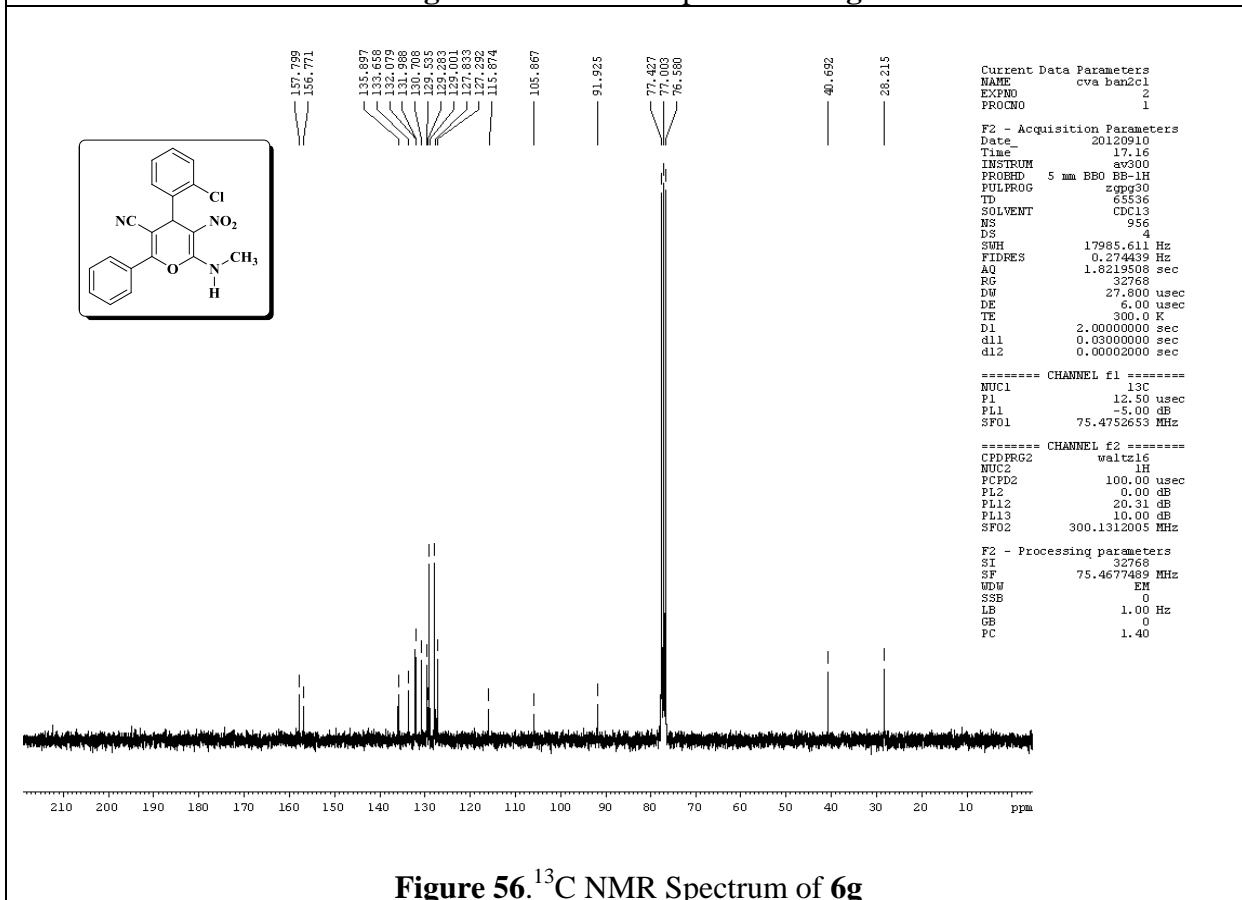

Figure 56. <sup>13</sup>C NMR Spectrum of 6g

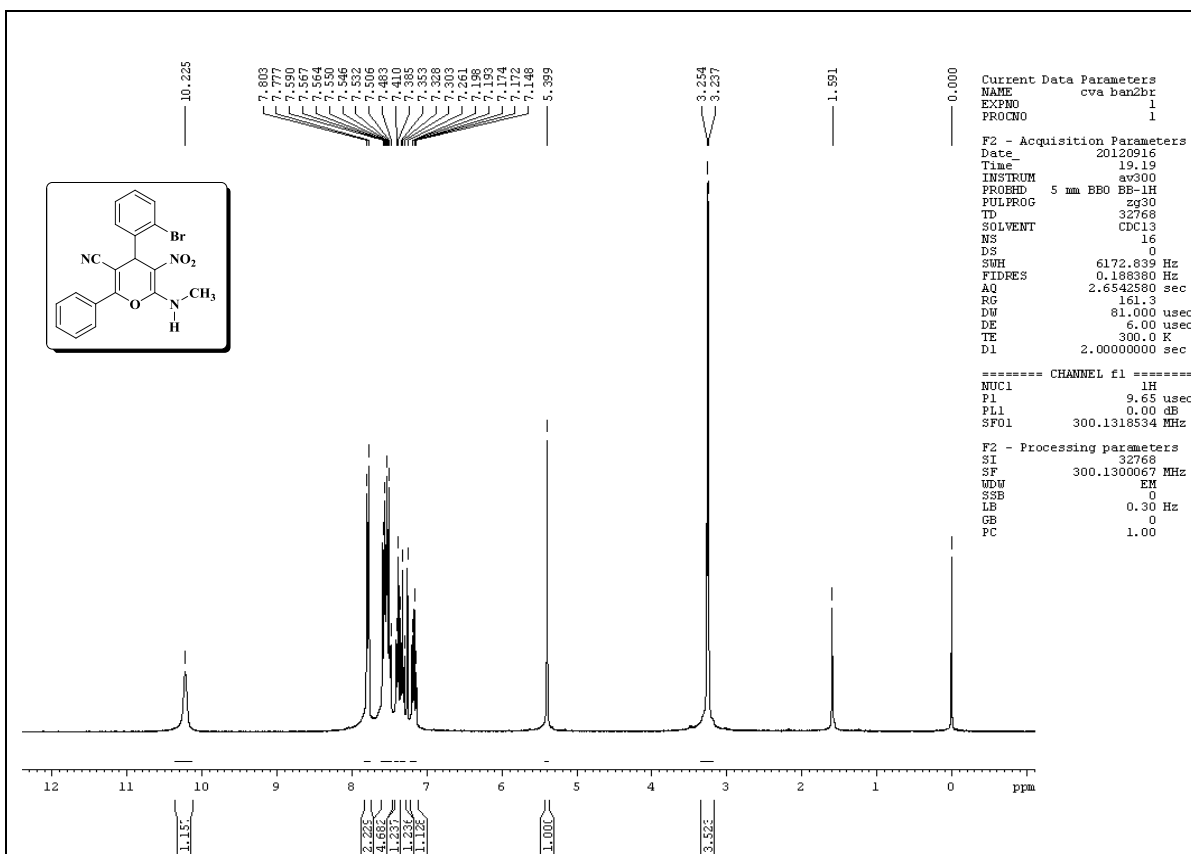

Figure 57. <sup>1</sup>H NMR Spectrum of 6h

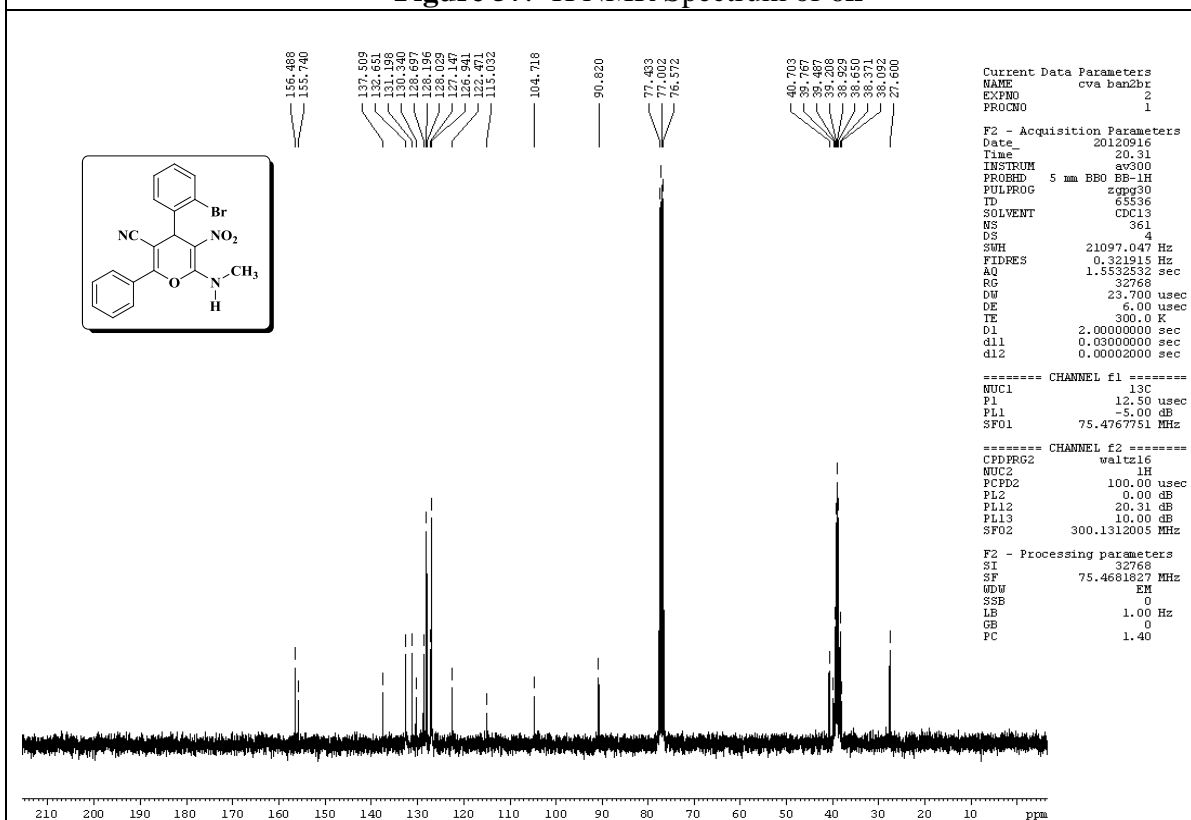

Figure 58. <sup>13</sup>C NMR Spectrum of 6h

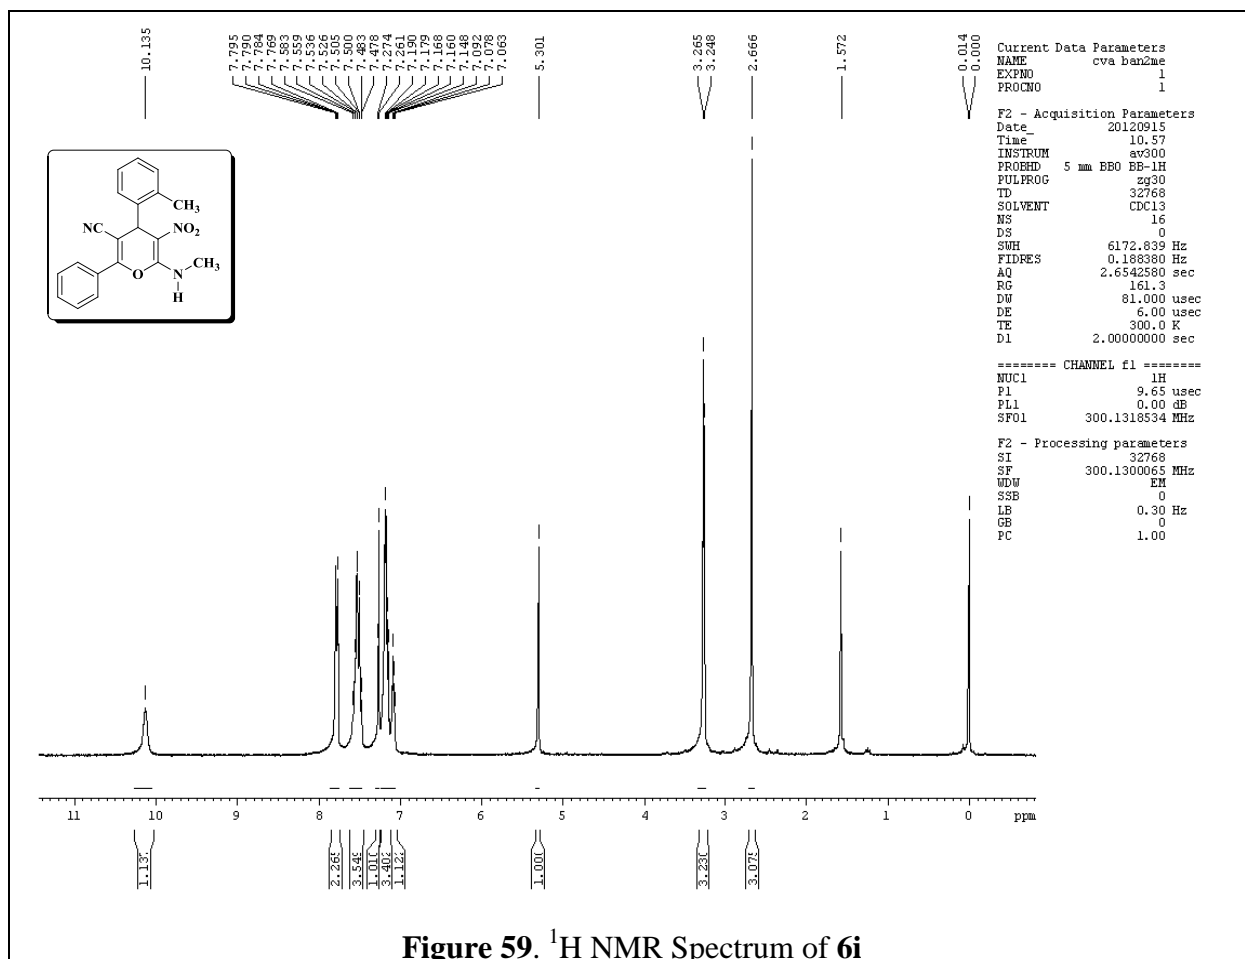

Figure 59. <sup>1</sup>H NMR Spectrum of **6i**

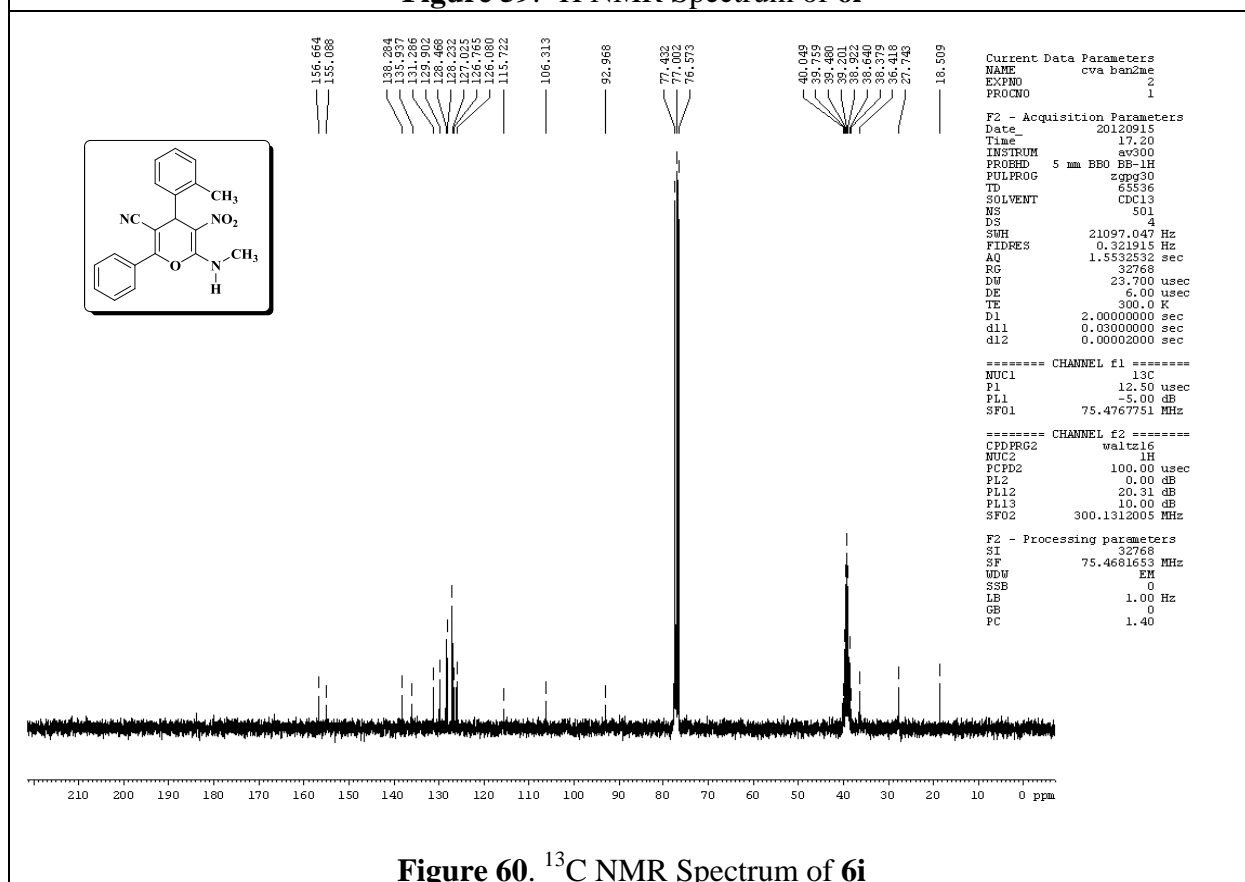

Figure 60. <sup>13</sup>C NMR Spectrum of **6i**

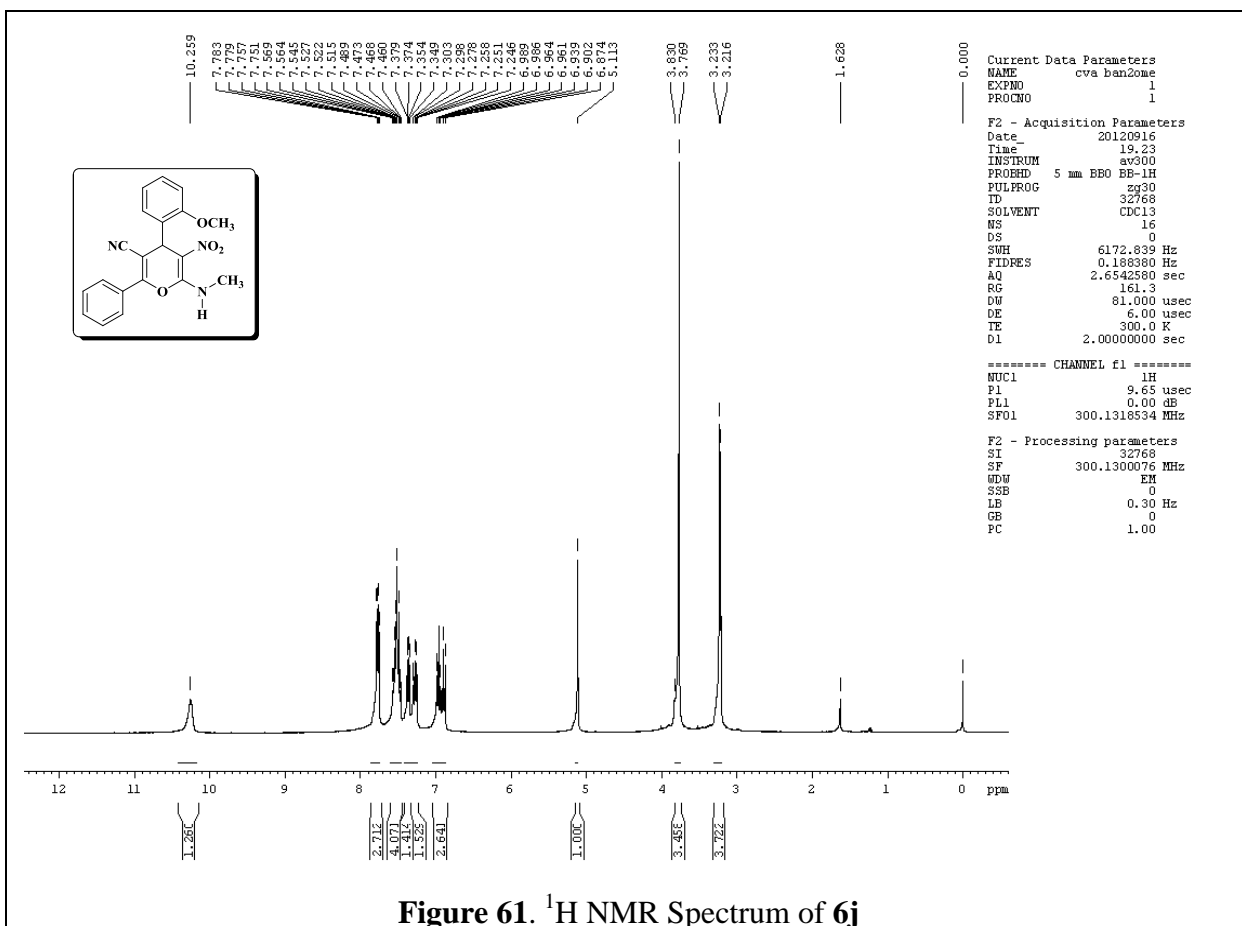

Figure 61. <sup>1</sup>H NMR Spectrum of 6j

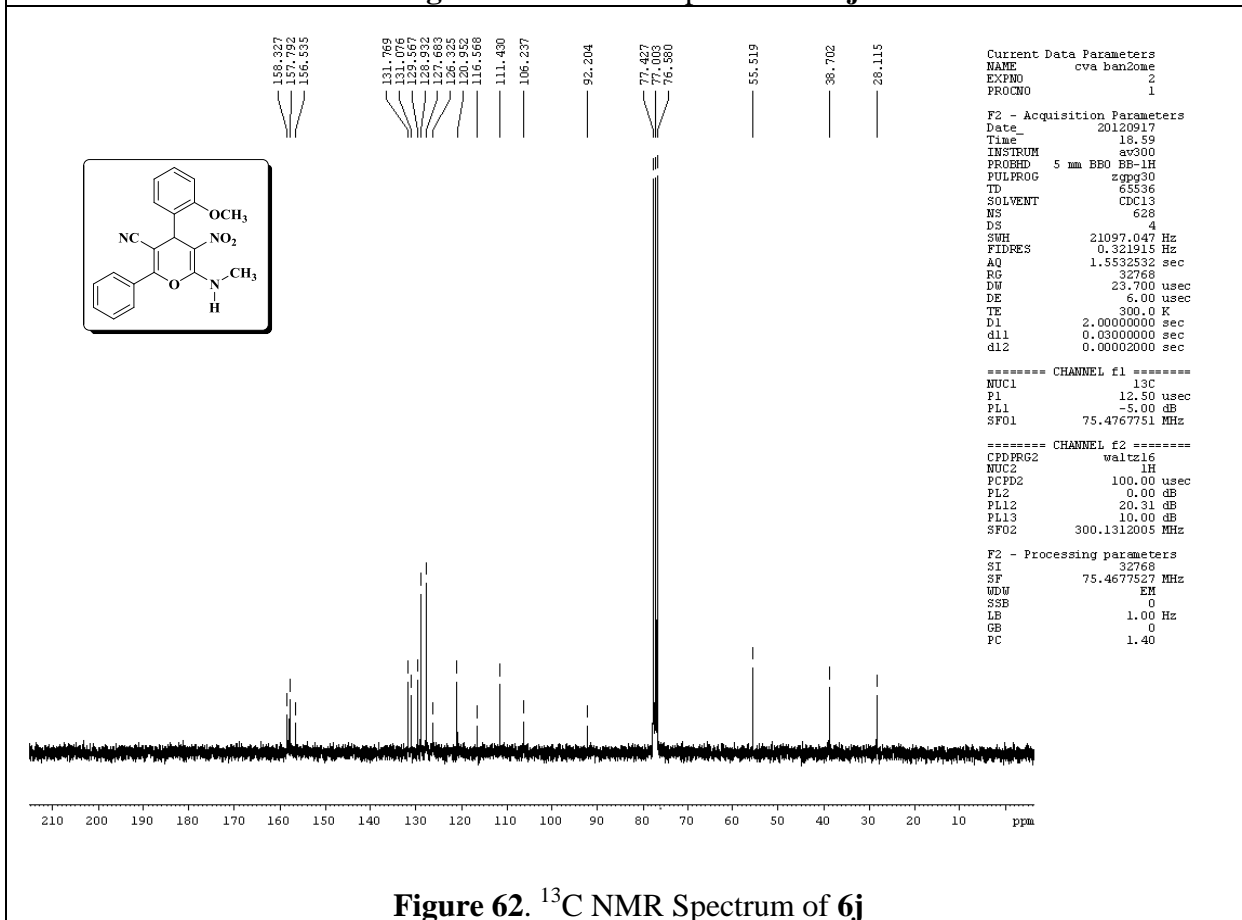

Figure 62. <sup>13</sup>C NMR Spectrum of 6j

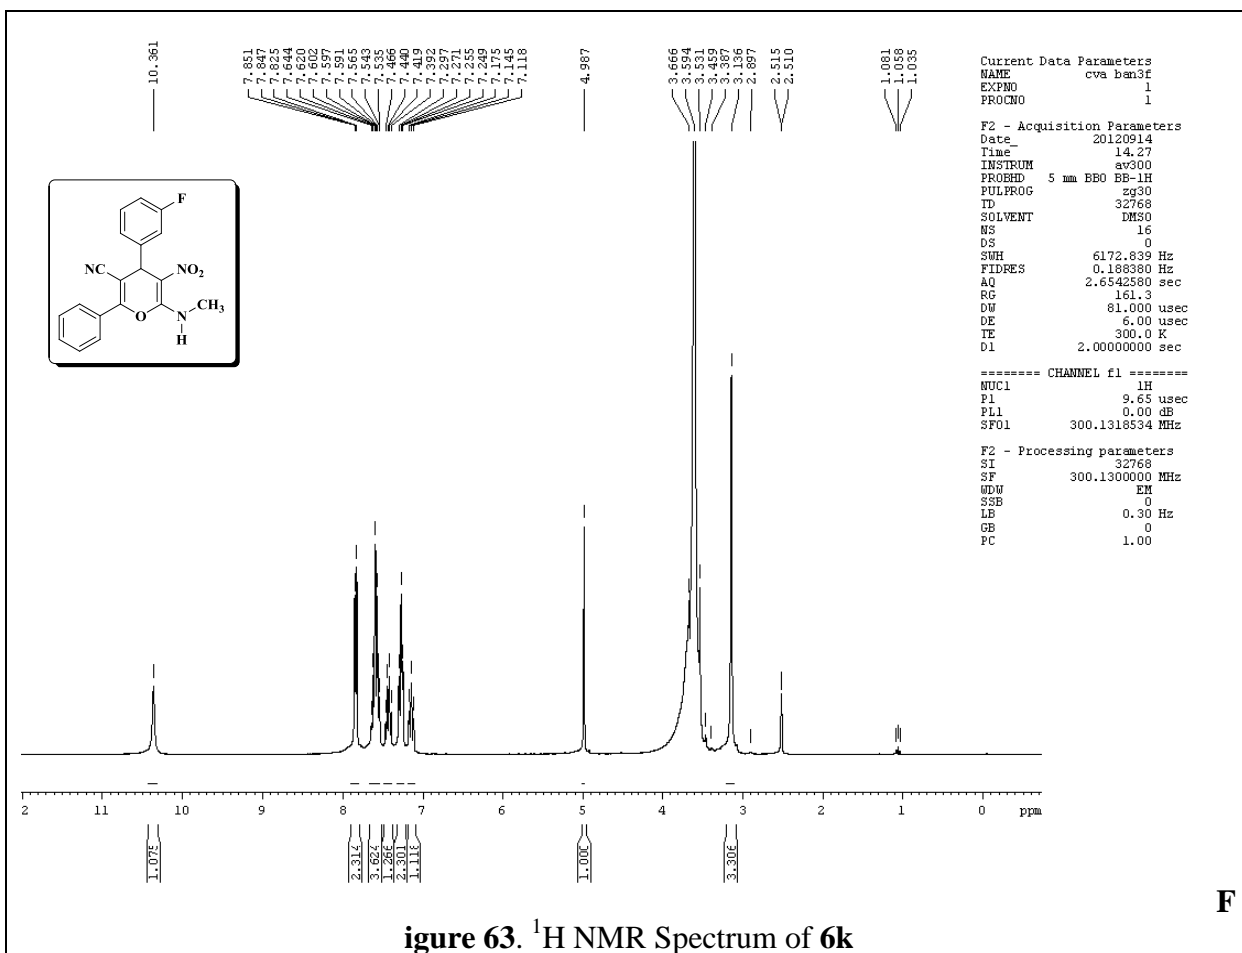

**Figure 63.**  $^1\text{H}$  NMR Spectrum of **6k**

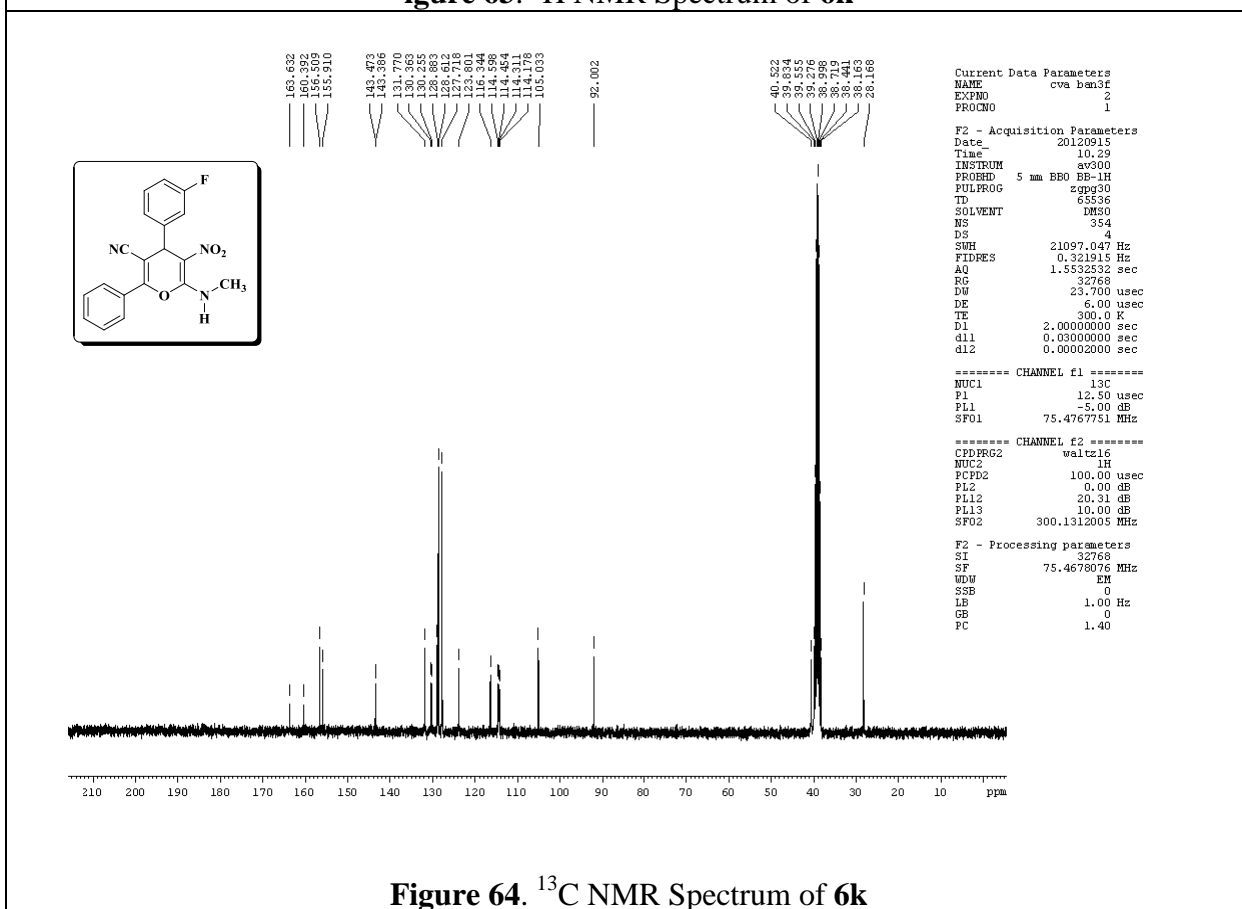

**Figure 64.**  $^{13}\text{C}$  NMR Spectrum of **6k**

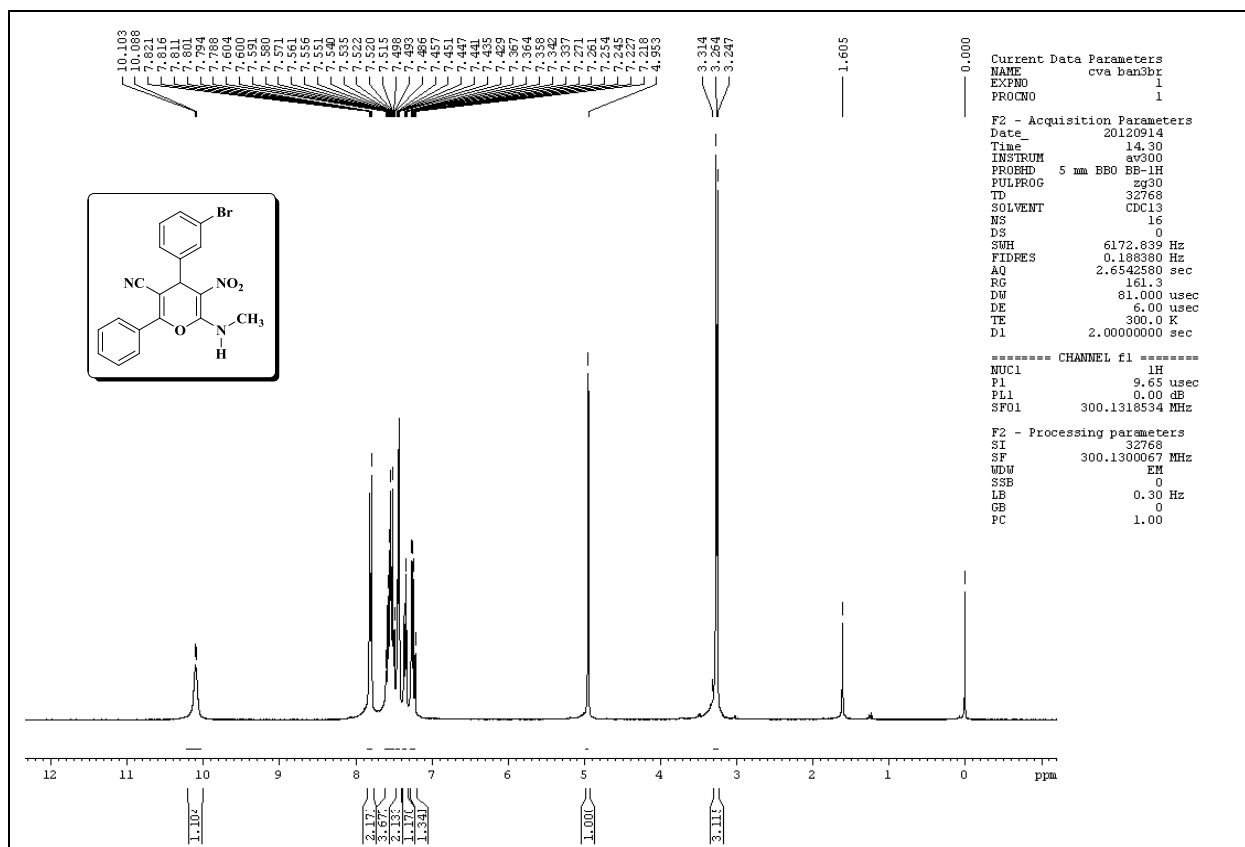

Figure 65. <sup>1</sup>H NMR Spectrum of **6l**

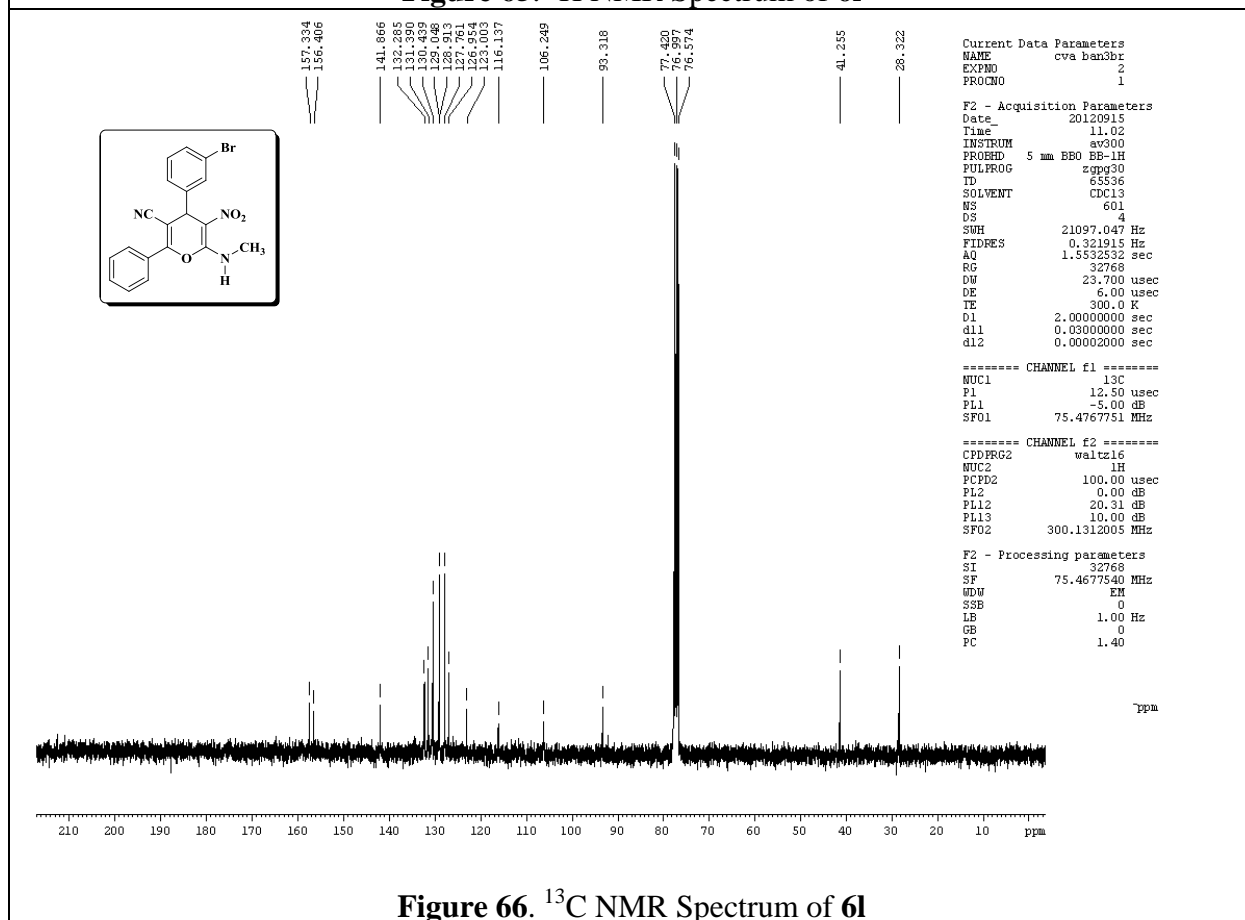

Figure 66. <sup>13</sup>C NMR Spectrum of **6l**

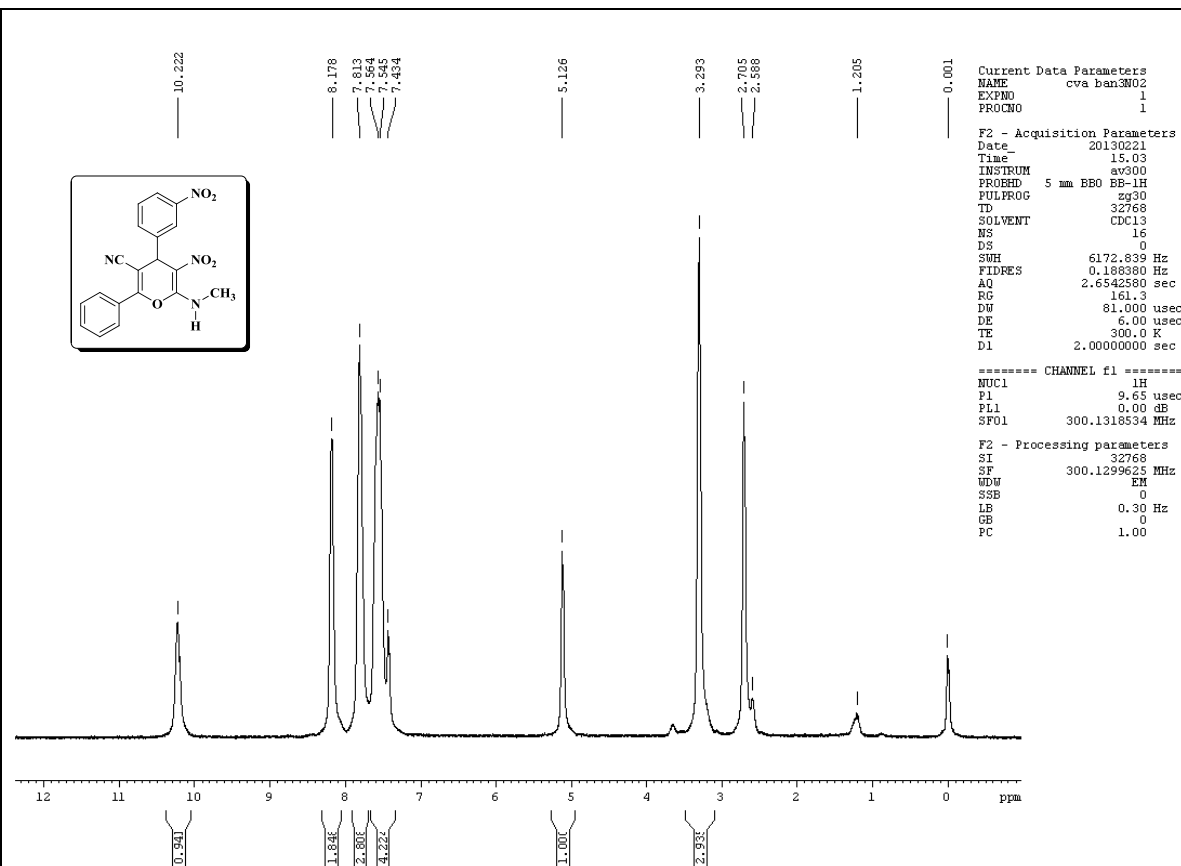

figure 67. <sup>1</sup>H NMR Spectrum of 6m

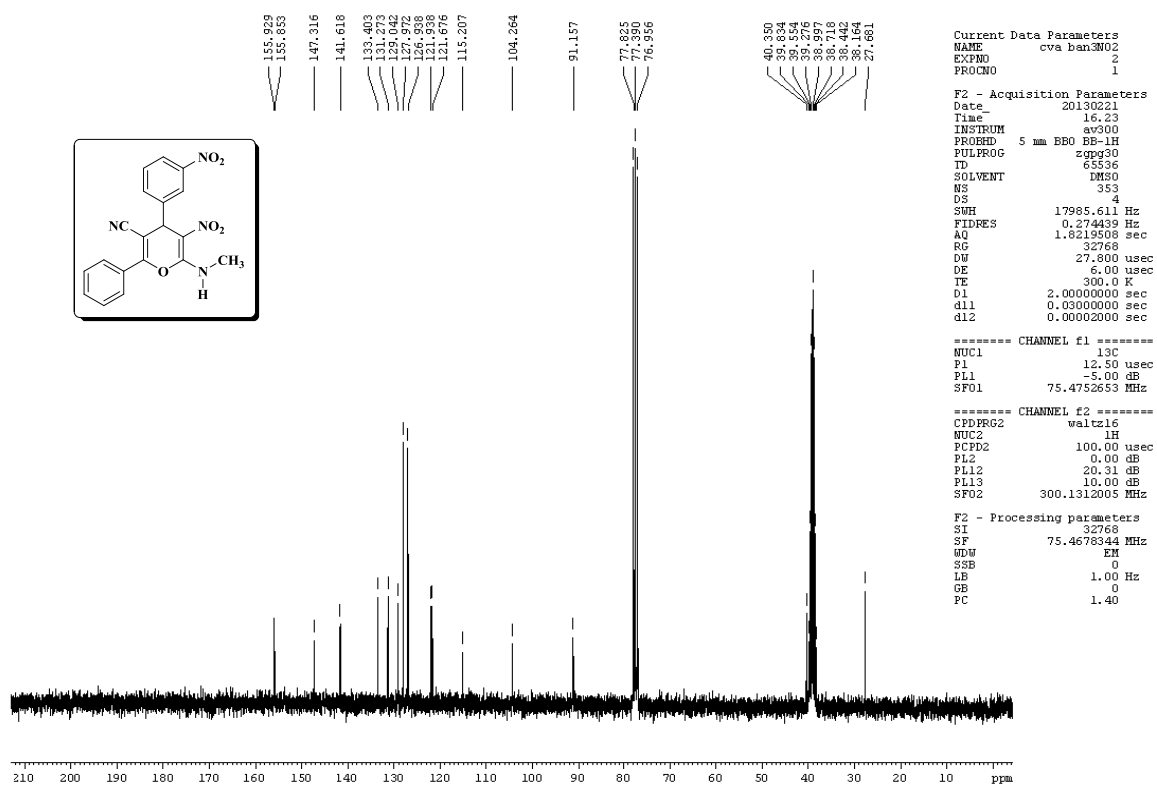

figure 68. <sup>13</sup>C NMR Spectrum of 6m

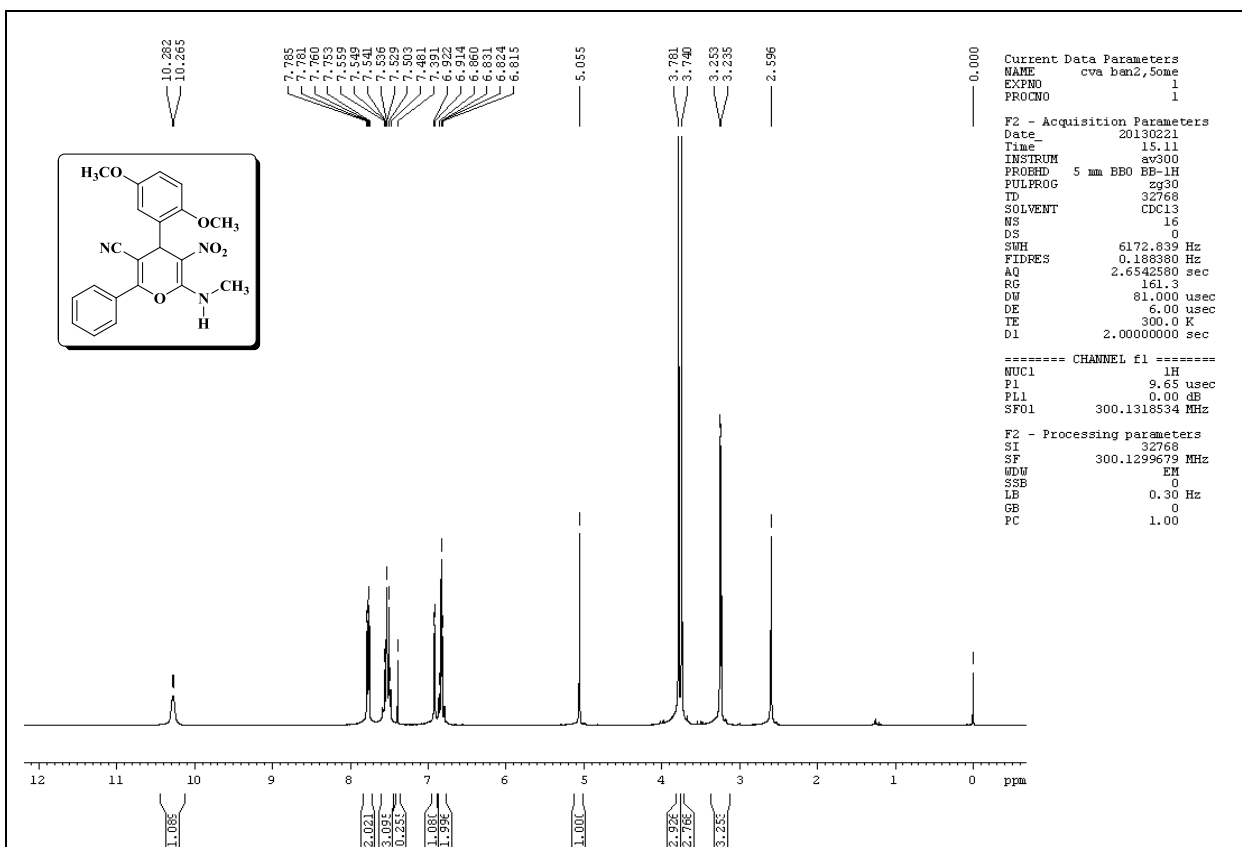

Figure 69. <sup>1</sup>H NMR Spectrum of 6n

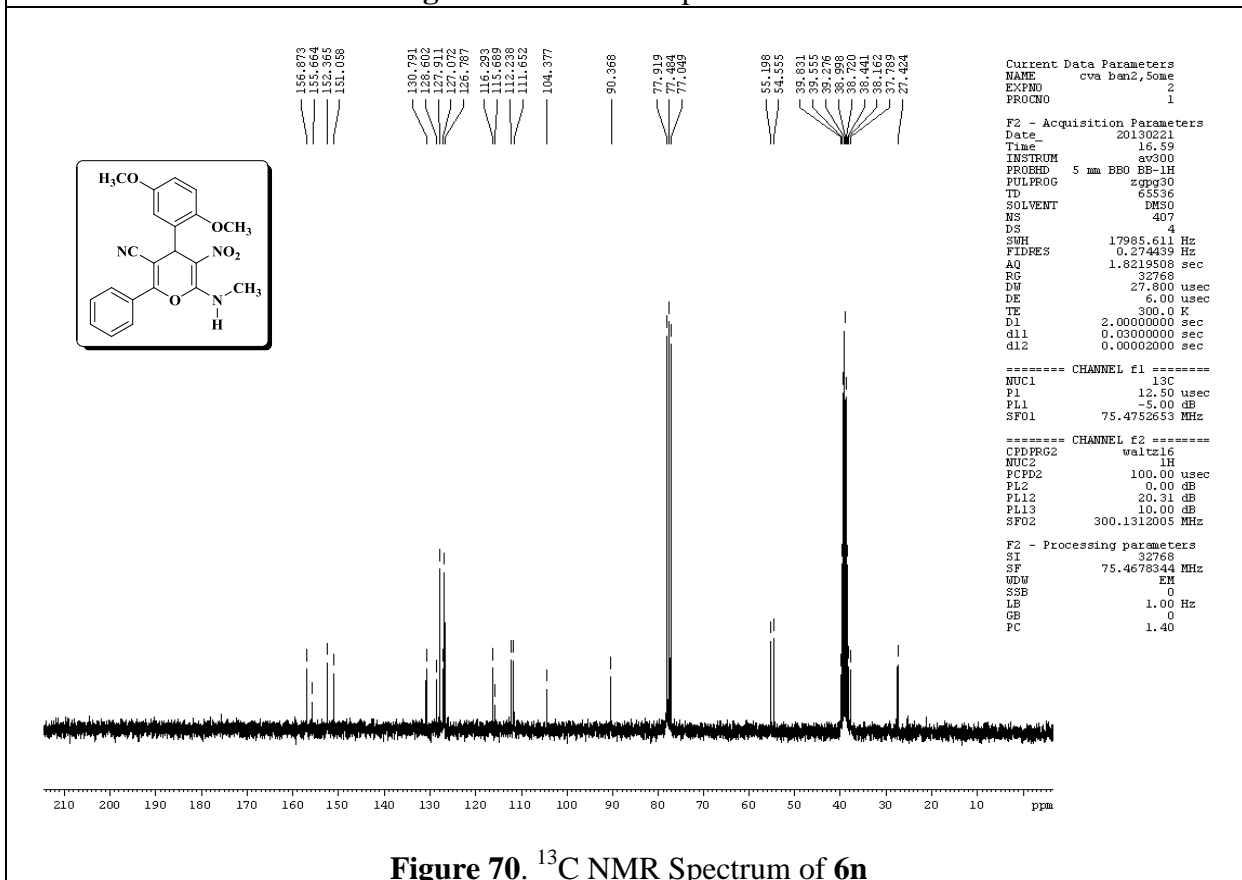

Figure 70. <sup>13</sup>C NMR Spectrum of 6n

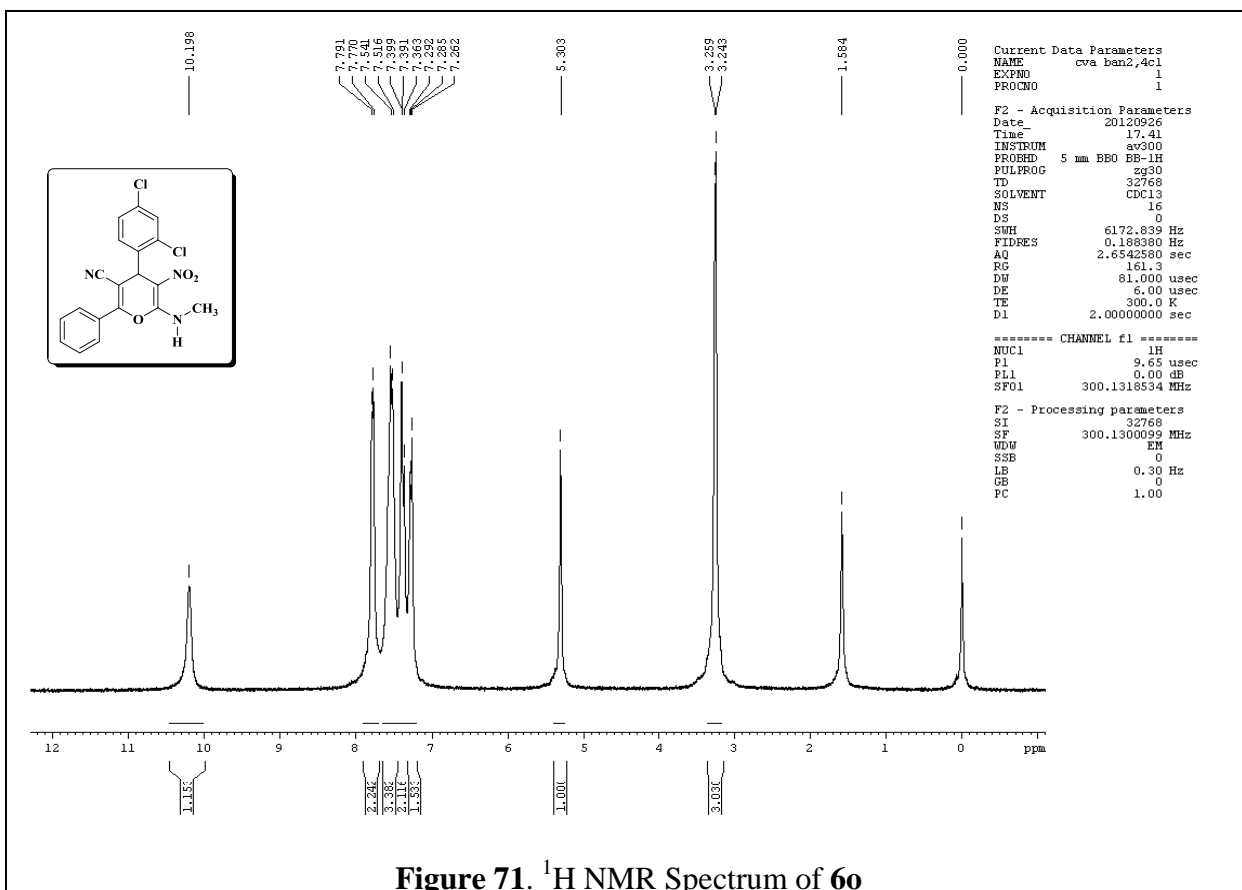

**Figure 71.**  $^1\text{H}$  NMR Spectrum of **60**

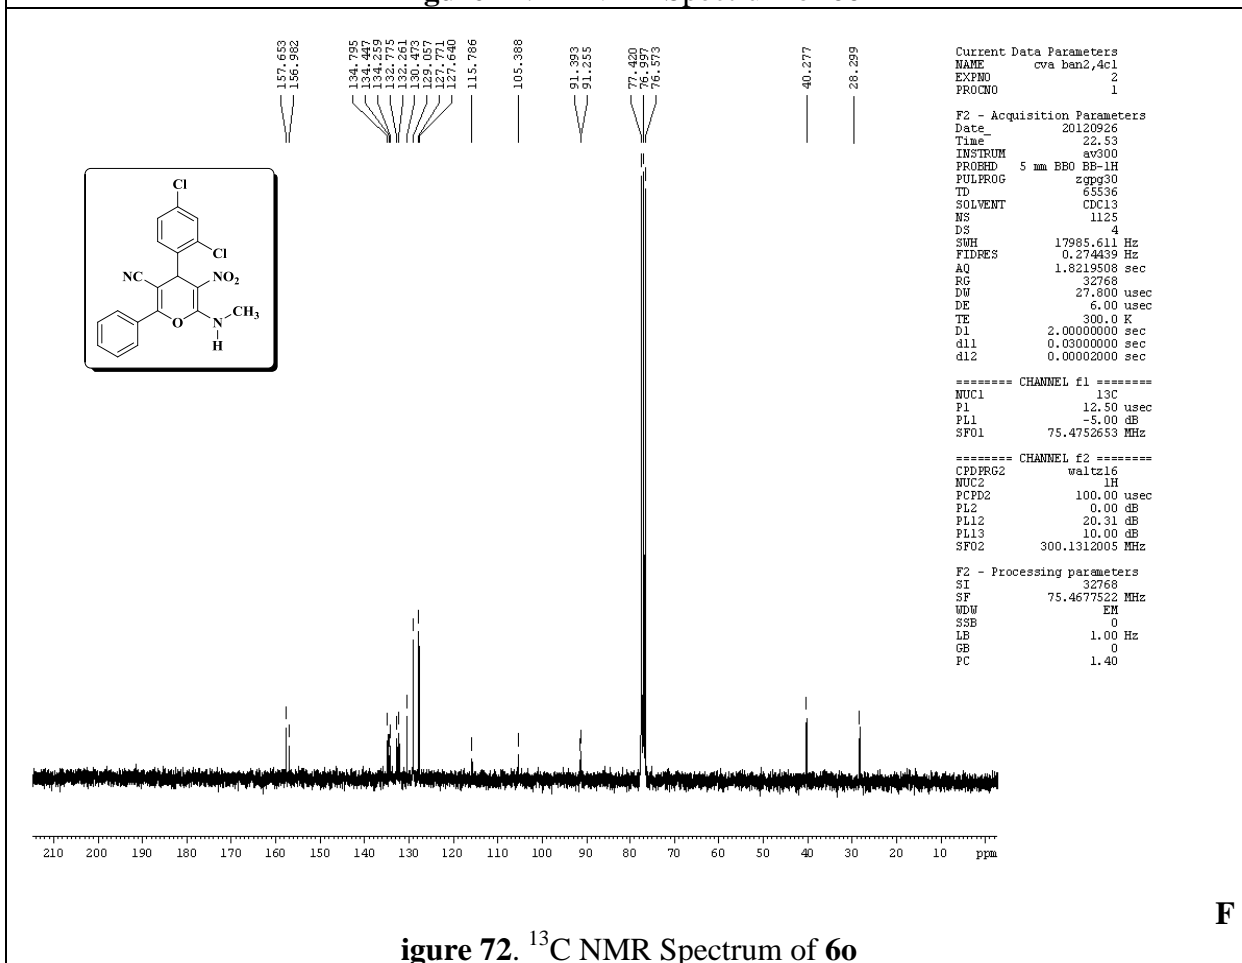

**figure 72.**  $^{13}\text{C}$  NMR Spectrum of **60**

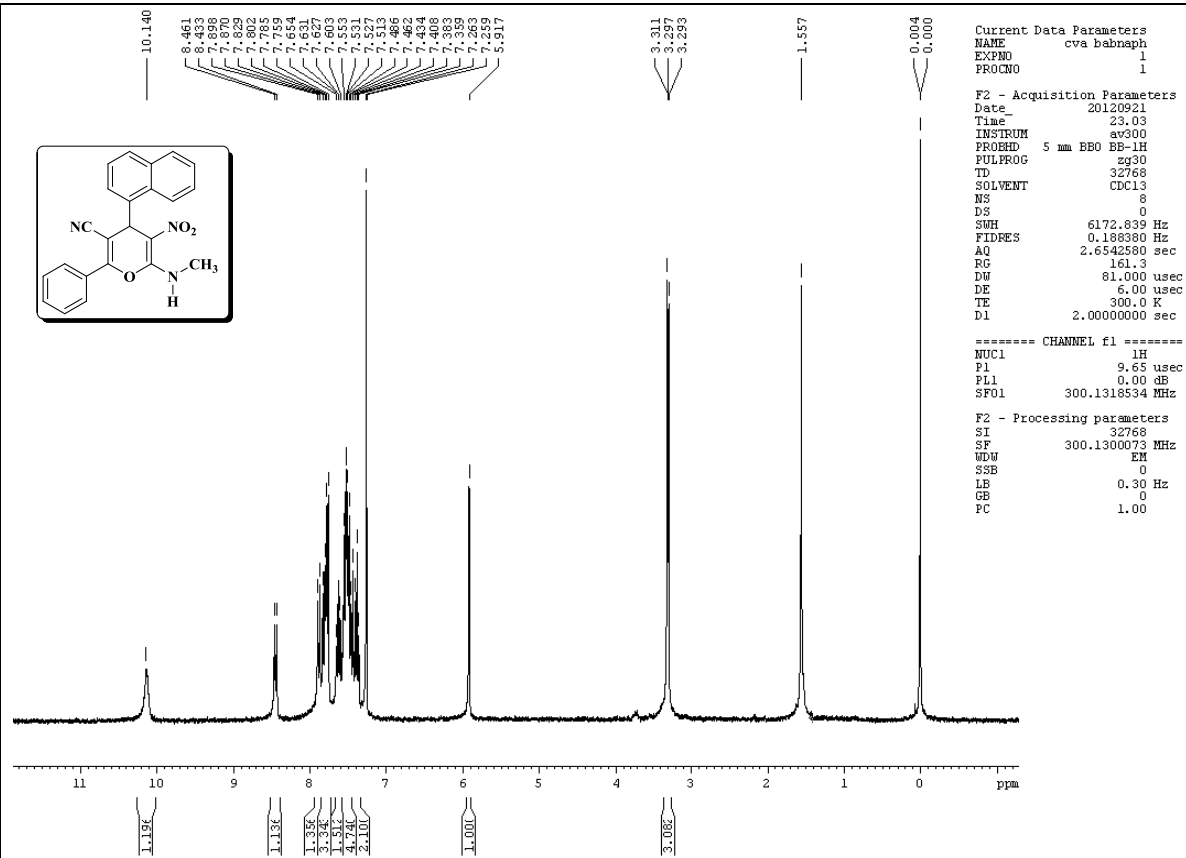

figure 73. <sup>1</sup>H NMR Spectrum of 6p

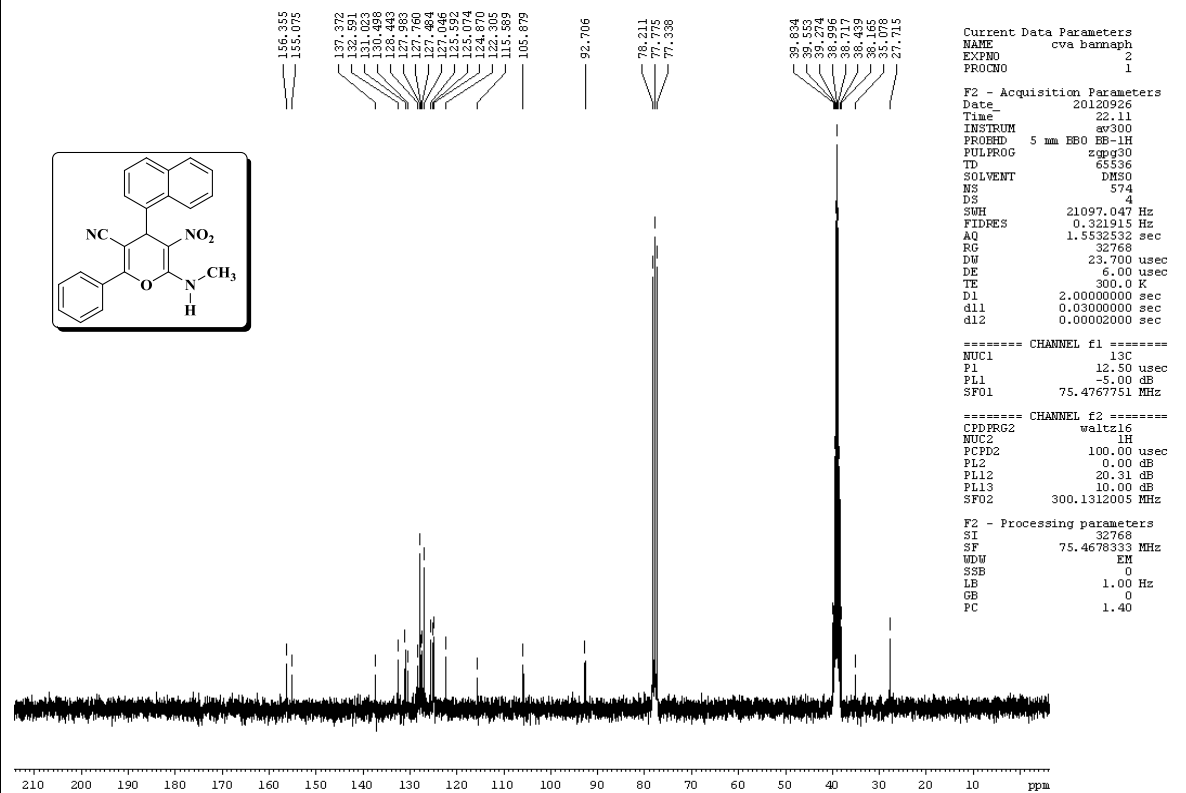

Figure 74. <sup>13</sup>C NMR Spectrum of 6p

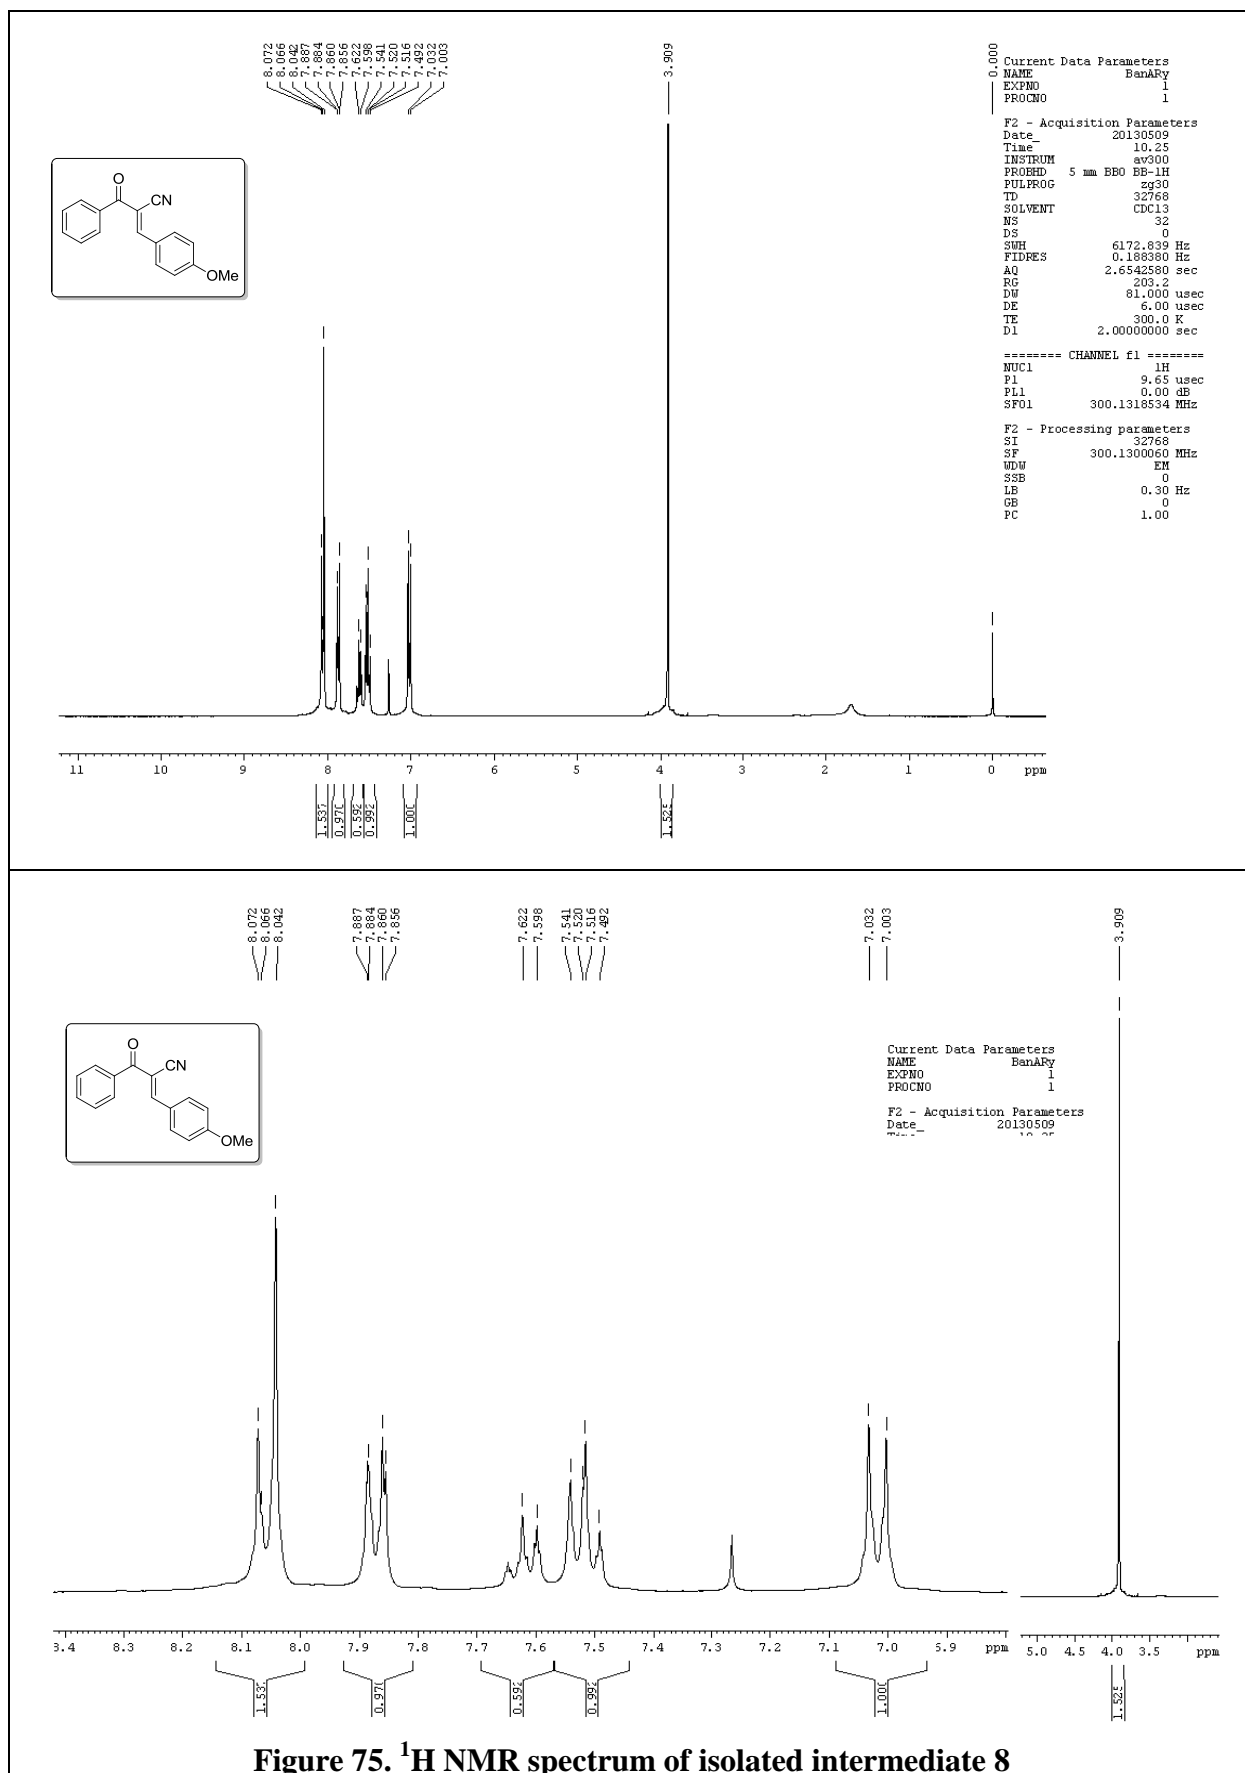

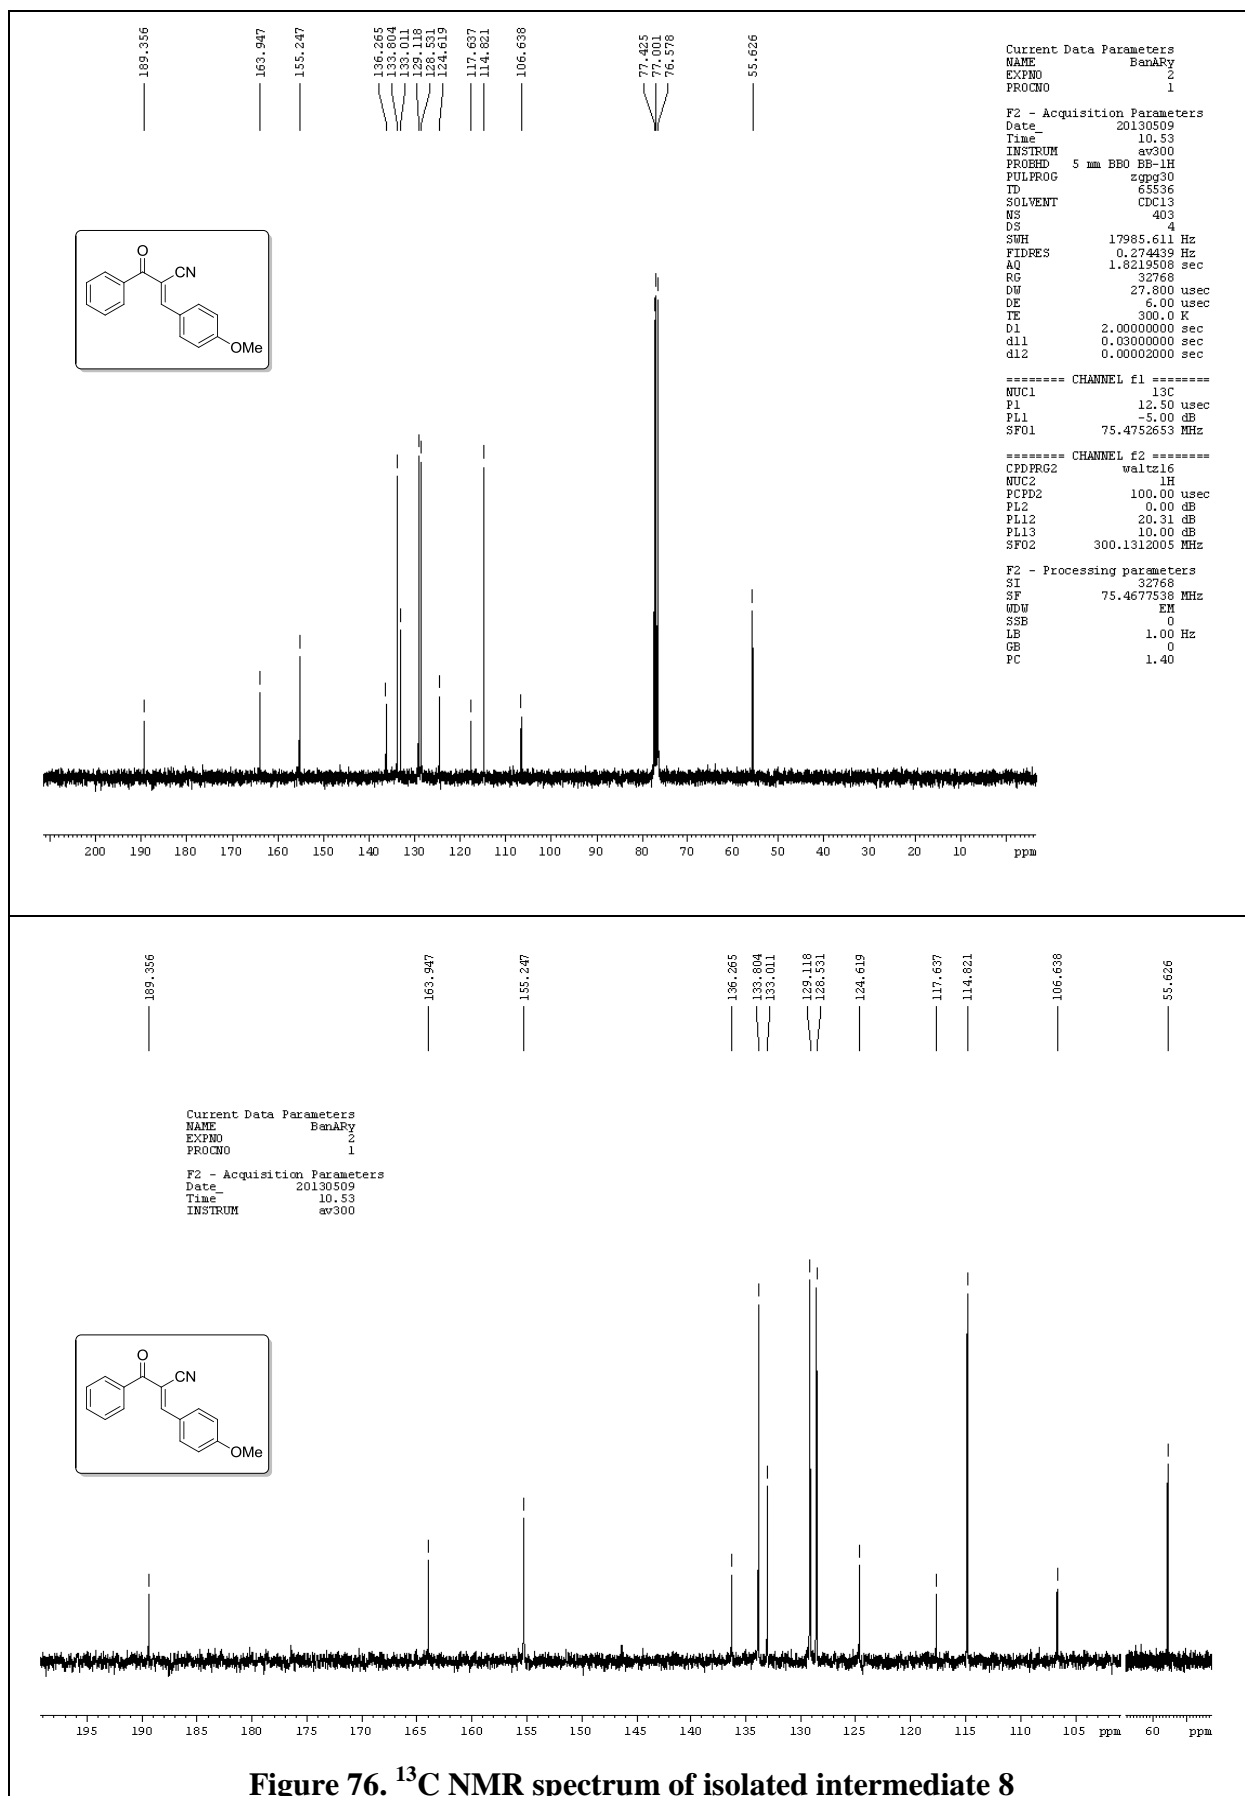

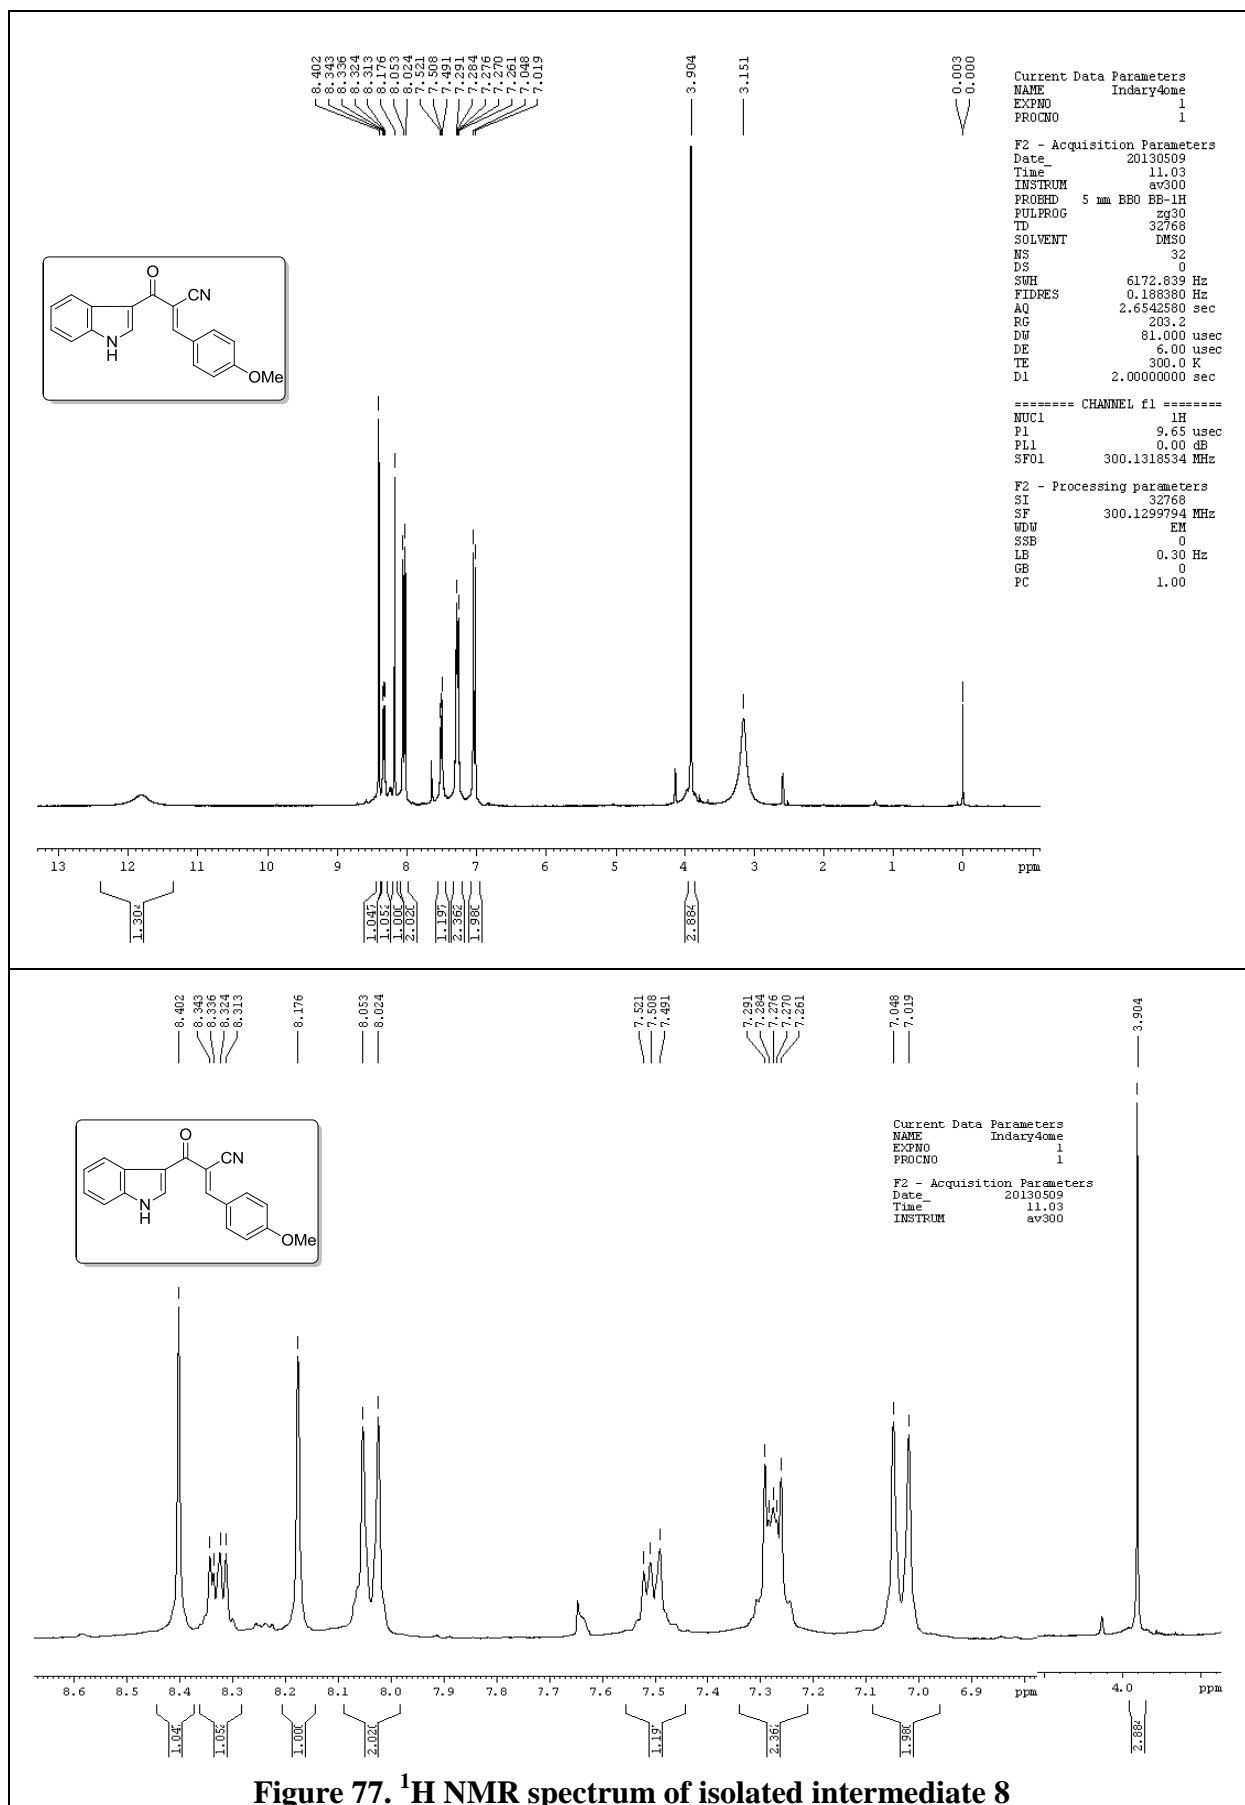

Figure 77.  $^1\text{H}$  NMR spectrum of isolated intermediate 8

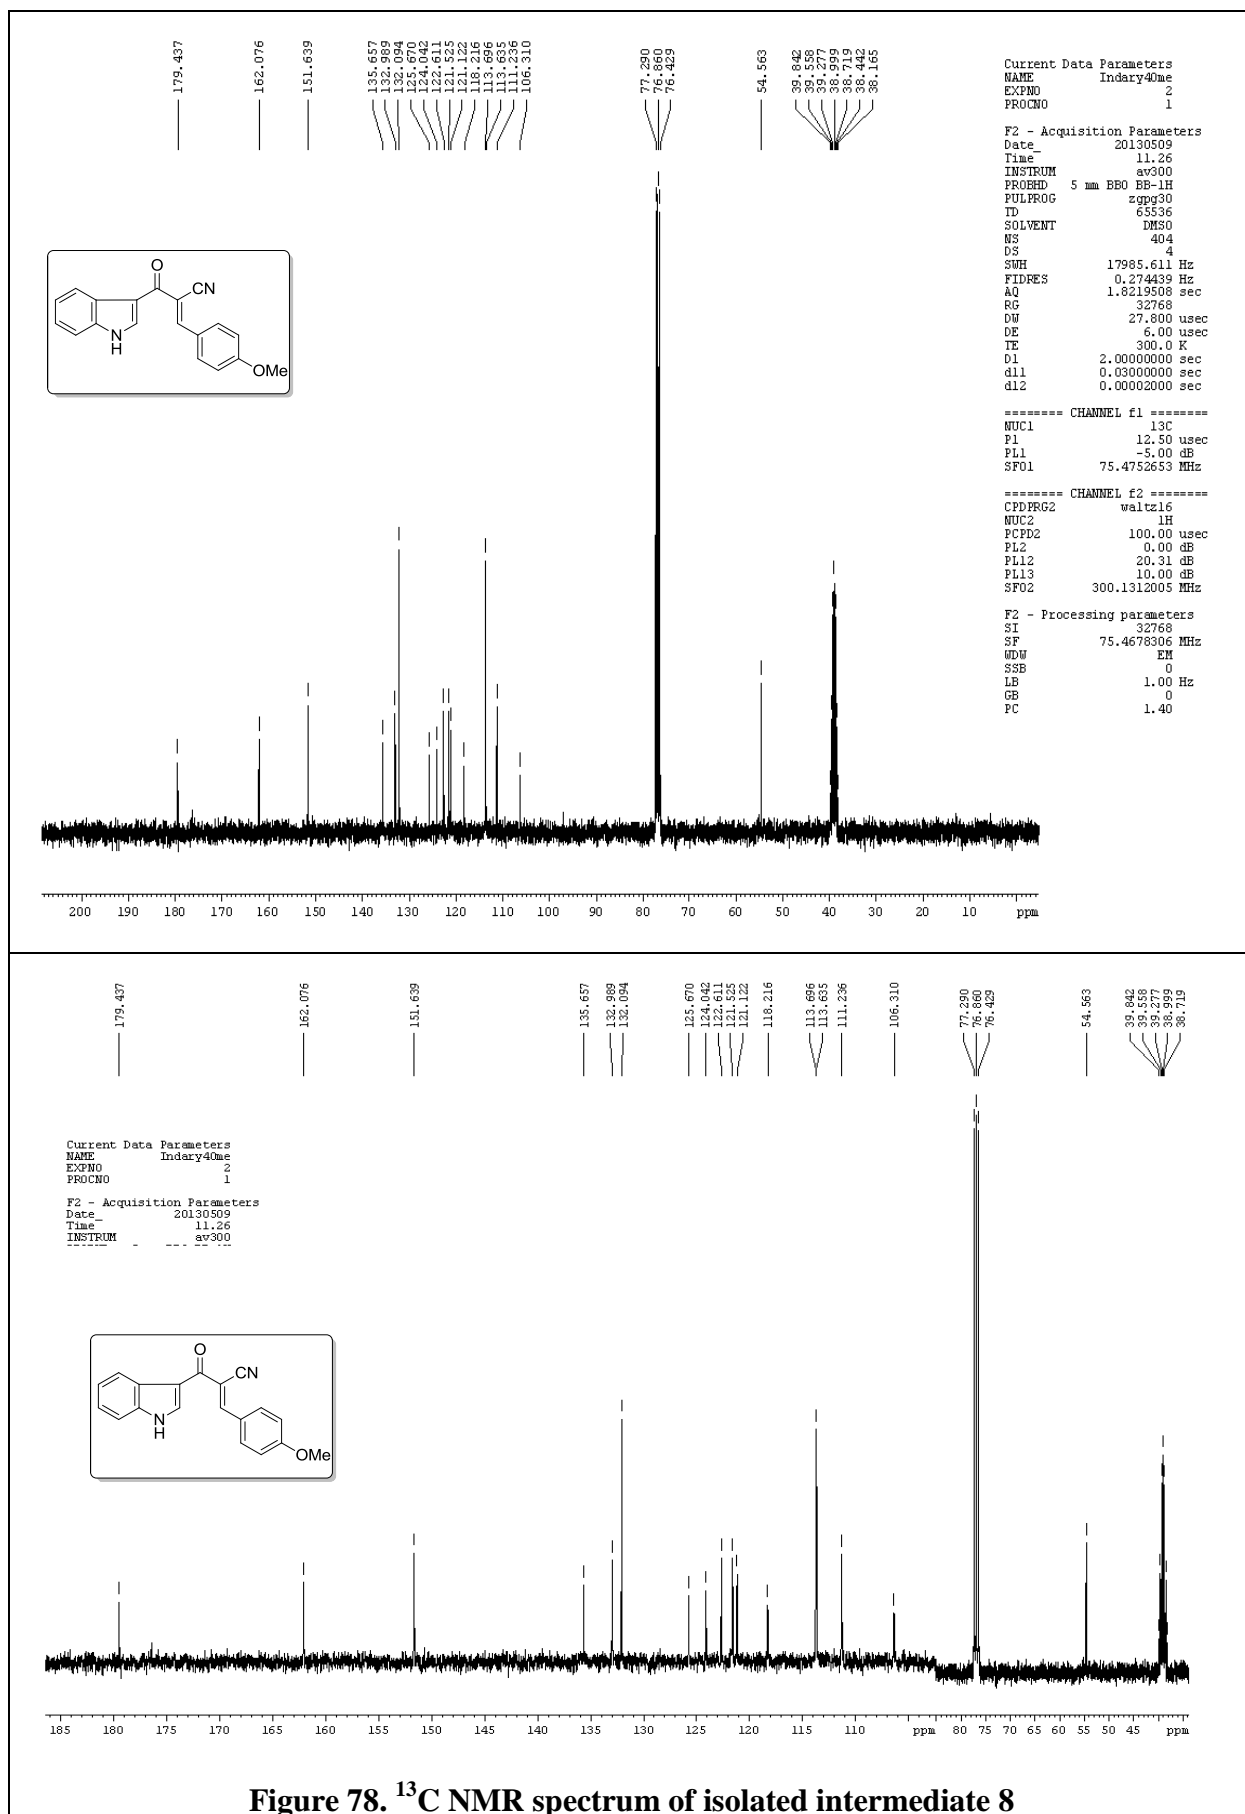

Figure 78.  $^{13}\text{C}$  NMR spectrum of isolated intermediate 8
